# Supplementary material
Source: PubMed Central journal article supplement (PMC6364590)
Supplement: rspb20182076supp14.pdf [file rspb20182076supp14.pdf]

# Supplementary Material

to

## An integrative phylogenomic approach illuminates the evolutionary history of cockroaches and termites (Blattodea)

Dominic A. Evangelista, Benjamin Wipfler, Olivier Béthoux, Alexander Donath, Mari Fujita, Manpreet K. Kohli, Frédéric Legendre, Shanlin Liu, Ryuichiro Machida, Bernhard Misof, Ralph S. Peters, Lars Podsiadlowski, Jes Rust, Kai Schuette, Ward Tollenaar, Jessica L. Ware, Torsten Wappler, Xin Zhou, Karen Meusemann, Sabrina Simon

### Table of Contents

|    |                                                                                                        |    |
|----|--------------------------------------------------------------------------------------------------------|----|
| 11 | <b>Table of Contents</b> .....                                                                         | 1  |
| 12 | Index of figures and tables.....                                                                       | 3  |
| 13 | S1 Datasets and molecular analyses.....                                                                | 3  |
| 14 | Figures.....                                                                                           | 3  |
| 15 | Tables.....                                                                                            | 3  |
| 16 | S2 Fossil selection.....                                                                               | 4  |
| 17 | S3 Evolution of morphology, behavior and life history.....                                             | 4  |
| 18 | Tables.....                                                                                            | 4  |
| 19 | S4 Nomenclature.....                                                                                   | 4  |
| 20 | Tables.....                                                                                            | 4  |
| 21 | Note on taxon names.....                                                                               | 5  |
| 22 | S1 Datasets and molecular analyses.....                                                                | 6  |
| 23 | S1.1 Molecular dataset generation.....                                                                 | 6  |
| 24 | Taxon sampling, sequencing and assembly.....                                                           | 6  |
| 25 | Identification of orthologous sequences.....                                                           | 6  |
| 26 | Alignment, protein domain identification, alignment masking, optimizing datasets.....                  | 7  |
| 27 | S1.2 Phylogenetic inference and assessing support.....                                                 | 9  |
| 28 | Dataset partitioning.....                                                                              | 9  |
| 29 | Tree search and bootstrapping.....                                                                     | 10 |
| 30 | Rogue taxon analyses.....                                                                              | 11 |
| 31 | S1.3 Identity and phylogenetic position of <i>Anallacta</i> .....                                      | 11 |
| 32 | S1.4 Topology tests: Approximately Unbiased (AU) tests and Four-cluster Likelihood Mapping (FcLM)..... | 13 |
| 34 | S1.5 Divergence time estimation.....                                                                   | 17 |
| 35 | Fossil calibrations and maximum bounds.....                                                            | 17 |

|    |                                                                                                |     |
|----|------------------------------------------------------------------------------------------------|-----|
| 36 | Estimating divergence times .....                                                              | 18  |
| 37 | S1.6 Inferring the presence of <i>Blattabacterium</i> within transcriptome data .....          | 19  |
| 38 | Current understanding of <i>Blattabacterium</i> in Blattodea .....                             | 19  |
| 39 | BLAST survey for <i>Blattabacterium</i> .....                                                  | 20  |
| 40 | <i>Blattabacterium</i> presence in transcriptomes .....                                        | 20  |
| 41 | Figures .....                                                                                  | 22  |
| 42 | References.....                                                                                | 31  |
| 43 | S2 Fossil Calibrations .....                                                                   | 39  |
| 44 | S2.1 Fossils Selected as Clade Minimum Age Calibrations .....                                  | 39  |
| 45 | Selected fossil calibrations.....                                                              | 39  |
| 46 | References.....                                                                                | 52  |
| 47 | S2.2 Fossils Excluded as Clade Minimum Age Calibrations .....                                  | 60  |
| 48 | Fossils excluded as calibration points .....                                                   | 60  |
| 49 | References.....                                                                                | 80  |
| 50 | S2.3 Locality Ages.....                                                                        | 88  |
| 51 | Localities.....                                                                                | 88  |
| 52 | References.....                                                                                | 90  |
| 53 | S3 Evolution of morphology, behavior and life history.....                                     | 93  |
| 54 | S3.1 Current knowledge about phenotypic evolution in Blattodea.....                            | 93  |
| 55 | S3.2 Ancestral state reconstruction of phenotypic traits .....                                 | 93  |
| 56 | S3.3 Detailed description of selected characters.....                                          | 94  |
| 57 | S3.4 Results and discussion .....                                                              | 96  |
| 58 | References.....                                                                                | 97  |
| 59 | S4 Taxonomic terminology.....                                                                  | 101 |
| 60 | S4.1 Criteria for naming clades.....                                                           | 101 |
| 61 | S4.2 Systematic entomology for the newly proposed terms .....                                  | 101 |
| 62 | References.....                                                                                | 102 |
| 63 | Appendix: Supplementary files and descriptions provided via the Digital Repository DRYAD ..... | 105 |
| 64 |                                                                                                |     |
| 65 |                                                                                                |     |
| 66 |                                                                                                |     |
| 67 |                                                                                                |     |
| 68 |                                                                                                |     |

69  
70  
71  
72  
73  
74  
75  
76  
77  
78  
79  
80  
81  
82  
83  
84  
85  
86  
87  
88  
89  
90  
91  
92  
93  
94  
95  
96  
97  
98  
99  
100  
101  
102  
103  
104  
105  
106  
107  
108  
109  
110  
111

## Index of figures and tables

Tables are provided as separate files (Excel Format).

### S1 Datasets and molecular analyses

#### Figures

- Figure S1. Heat maps show pairwise Bowker's tests visualizing among-lineage heterogeneity as implemented in SymTest 2.0.47
- Figure S2. Heat maps show species-pairwise site coverage analyzed with AliStat.
- Figure S3. Best ML (phylogram) inferred from the full nucleotide dataset with 2<sup>nd</sup> codon position only with bootstrap support mapped onto the best tree.
- Figure S4. FcLM results of original and permuted data.
- Figure S5. Fossil calibrations used for estimating divergence dates of Blattodea.
- Figure S6. Distributions of ages for the nine calibrated nodes of the reduced dataset used for divergence date estimates.
- Figure S7. Pairwise comparison of posterior mean node age estimates and upper and lower confidence intervals (CI) of four independent runs of the reduced decisive amino-acid dataset.
- Figure S8. Pairwise comparison of posterior mean node age estimates and upper and lower confidence intervals (CI) of four independent runs of the unreduced decisive amino-acid dataset.

#### Tables

- Table S1. Detailed species list including NCBI accession numbers.
- Table S2. Cross-contamination and assembly statistics.
- Table S3. Reference species used for the ortholog set and number of orthologs identified
  - o Table S3.1: Official gene sets from whole genome projects of four reference species used for transcript orthology assessment, including the source, version and number of genes.
  - o Table S3.2: Orthograph statistics.
- Table S4. Groups defined for generating the decisive amino-acid dataset.
- Table S5. Review of evidence for the placement of *Anallacta* in Blattellinae.
- Table S6. Species group assignments for the Four-Cluster Likelihood Mapping (FcLM).
- Table S7. Results for approximately unbiased (AU) tests.
- Table S8. Selected fossil calibrations used in our study. (Justifications are provided in Suppl. material S2).
- Table S9. Comparison of ages obtained from three dating analyses.
- Table S10. Presence of *Blattabacterium* in Blattodea transcriptomes.

112 **S2 Fossil selection**

113           None.

114

115 **S3 Evolution of morphology, behavior and life history**

116           *Tables*

117           - Table S11. Data matrix for ancestral state reconstruction.

118           - Table S12. Results of ancestral state reconstruction.

119

120 **S4 Nomenclature**

121           *Tables*

122           - Table S13. List of used taxon names with their definitions and synonyms  
123           including the newly proposed names.

124

## Note on taxon names

125 In several files and figures, some species names may be different compared to the text  
 126 here and the main paper due to identification updates and corrections. Valid names are found in  
 127 the main text and Table S1. It concerns the following names:

128

| Name in analysed files<br>(outdated)                        | Correct and valid name             | Explanation                                                                         |
|-------------------------------------------------------------|------------------------------------|-------------------------------------------------------------------------------------|
| <i>Ischnoptera</i> sp.                                      | <i>Ischnoptera deropeltiformis</i> | Correct species name updated                                                        |
| <i>Eurycotis floridiana</i> ,<br><i>Eurycotis decipiens</i> | <i>Eurycotis floridana</i>         | Typo corrected and wrong species name corrected that was partially used by accident |
| <i>Cryptocercus</i> sp.                                     | <i>Cryptocercus wrighti</i>        | Correct species name updated                                                        |
| <i>Lamproblatta albipalpa</i>                               | <i>Lamproblatta albipalpus</i>     | Typo corrected                                                                      |
| <i>Gratidia madagassa</i>                                   | <i>Antongilia madagassa</i>        | Correct genus name updated                                                          |
| <i>Timema christinae</i>                                    | <i>Timema cristinae</i>            | Typo corrected                                                                      |
| <i>Blatella germanica</i>                                   | <i>Blattella germanica</i>         | Typo corrected                                                                      |
| <i>Princisia vanwaerebecki</i>                              | <i>Princisia vanwaerebeki</i>      | Typo corrected                                                                      |

129

130

131

## S1 Datasets and molecular analyses

132

### 133 S1.1 Molecular dataset generation

#### 134 *Taxon sampling, sequencing and assembly*

135 The dataset comprised 66 taxa in total, including sequence data from 45 Blattodea and 21  
136 outgroup taxa. These outgroup taxa represent all major Polyneoptera lineages, including  
137 grasshoppers, crickets and allies (Orthoptera), stoneflies (Plecoptera), earwigs (Dermaptera),  
138 mantids (Mantodea), stick and leaf insects (Phasmatodea), heelwalkers (Mantophasmatodea), ice  
139 crawlers (Grylloblattodea), webspinners (Embioptera), and ground lice (Zoraptera) (Table S1).

140 Data was derived from transcriptomes, except for the termite *Zootermopsis nevadensis*  
141 for which we used the official gene set derived from a whole genome project. Specimens were  
142 either preserved in liquid nitrogen, then kept frozen at -35°C or directly grounded in RNAlater  
143 and kept at 4°C until further processing. Details on all samples used for sequencing are provided  
144 on NCBI. RNA extraction and cDNA library preparation, transcriptome sequencing, and *de novo*  
145 assembly were conducted at the Beijing Genomics Institute (BGI) Shenzhen and are described in  
146 detail in Peters et al. (2017). All samples except for one were sequenced on Hiseq 2000 platform  
147 with 150 bp paired-end (PE) reads, generating approximately 2.5Gb of raw data each. Due to  
148 limited RNA inputs (< 1 ug), we used the TruSeq mRNA library Pre Kit (Illumina, Ca. USA) for  
149 *Diploptera punctata* and sequenced it with 90 PE reads. Details about procedure of RNA  
150 extraction, library preparation and Illumina sequencing are described in Peters et al. (2017).

151 Raw reads were assembled using the assembler SOAPdenovo-Trans -SOAPdenovo-  
152 Trans-31kmer (Xie et al., 2014) as described in Peters et al. (2017). Subsequent quality  
153 assessment including check and removal of contaminants as well as submission to NCBI  
154 Sequence Read Archive (SRA) and the Transcriptome Shotgun Assembly (TSA) database were  
155 conducted as described in Peters et al. (2017). For details on the number of contigs before and  
156 after contamination check, see Table S2. Transcriptome data published with this study are  
157 deposited in GenBank NCBI under the 1KITE umbrella project Bioproject ID 183205 (Table  
158 S1).

159

#### 160 *Identification of orthologous sequences*

161 For the identification of orthologous transcripts we first generated a custom-made  
162 ortholog set from the public database OrthoDB 8 (<http://cegg.unige.ch/orthodb8>) (Kriventseva et  
163 al., 2015). The ortholog set was especially designed for Polyneoptera taxa. Therefore, we  
164 selected only those genes, which were inferred as single copy in the genomes of each of  
165 reference species (copy number = 1, other taxa included in the clade “Hexapoda” were set to an  
166 unknown number of copies “?”). We choose as reference species (official gene sets from whole  
167 genome projects available) *Ephemera danica*, *Ladona fulva* (both unpublished and access  
168 granted by the i5K community, in particular Stephen Richards, Bernhard Misof and Panagotis  
169 Provataris), *Zootermopsis nevadensis* (Terrapon et al., 2014), and *Rhodnius prolixus* (Mesquita  
170 et al., 2016). Cleaned versions (longest isoforms only and Selenocysteine replaced by X) of all

171 four official gene sets on amino-acid level as used in OrthoDB were kindly provided by Robert  
172 Waterhouse. Given the above set of reference species and with the hierarchical orthology  
173 reference node in the phylogenetic tree set to the clade comprising all insects (=Hexapoda),  
174 OrthoDB 8 specified 3,247 protein-coding genes as single-copy (orthologous sequence clusters  
175 for the four reference species). We downloaded corresponding files on transcript level (cds)  
176 respectively (see Table S3.1). Sequence headers were adjusted accordingly on transcript and  
177 amino-acid level. In addition, we removed sequences only occurring at amino-acid or cds level  
178 with scripts provided with the Orthograph package (Petersen et al., 2017). Using Orthograph  
179 (v.0.5.4), an ortholog set database was build based on the full official gene sets and respective  
180 orthologs. This ortholog set was subsequently used for orthology inference for all included  
181 species. Ortholog table, and official gene sets are available on DRYAD (Supplementary File  
182 “S1.1\_OrthologSet”).

183 Identification of orthologous transcripts for each taxon was carried out using Orthograph  
184 (v.0.5.4) (Petersen et al., 2017). We ran Orthograph with the following settings: max-blast-  
185 searches = 50, blast-max-hits = 50, extend-orf = 1, substitute-u-with = X, and leaving other  
186 settings to defaults. We further considered the best reciprocal hit (BRH) criterion being fulfilled  
187 if the reciprocal BLAST search found in at least one of the four reference taxa the candidate  
188 ortholog sequence as best hit (option strict-search turned off). Using these settings, we identified  
189 on average 2,370 orthologous genes/groups (OGs) (minimum: 1,534 OGs identified in *Nyctibora*  
190 sp., maximum: 2,986 OGs identified in *Prorhinotermes simplex*) (see Table S3.2 for Orthograph  
191 results).

192 Orthograph results were summarized according to each OG with the script  
193 summarize\_orthograph\_results.pl provided with the Orthograph package. We removed any  
194 terminal stop codon that were not encoded by the corresponding nucleotide sequence (option -t),  
195 masked stop symbols (\*) with X on amino-acid and with NNN on the transcript level; terminal  
196 stop codons that were not encoded by corresponding nucleotide sequence were not removed  
197 (option -s). Additionally, we masked Selenocysteine (symbol U) with “X” and “NNN”,  
198 respectively (option -u) since Selenocysteine cannot properly be handled by many software used  
199 for downstream analyses. This resulted into a total of 3,244 summarized OGs.

200

### 201 ***Alignment, protein domain identification, alignment masking, optimizing datasets***

202 The sequences of retrieved OGs were aligned on amino-acid level (aa) using MAFFT  
203 (v.7.245) (Kato & Standley, 2013) with the L-INS-i algorithm. Each aa multiple sequence  
204 alignment (MSA) was subsequently checked for the presence of outliers. Identified outliers were  
205 refined using a profile alignment approach as described in Misof et al. (2014) but using the -  
206 addfragments algorithm implemented in MAFFT. Subsequently, MSAs were checked a second  
207 time for outlier sequences, which were then removed from the aa MSAs and nucleotide (nt) OGs  
208 as described in Misof et al. (2014). We further removed sequences of the reference species  
209 *Ephemera danica*, *Ladona fulva* and *Rhodnius prolixus* from the aa MSAs and nt OGs since we  
210 aimed to include only Polyneoptera taxa for the phylogenetic inference. We discarded columns

211 only containing gaps in the amino-acid MSAs caused by the removal of sequences of the  
212 reference genomes. We then generated MSAs of nucleotides corresponding to the amino-acid  
213 MSAs with a modified version of the software PAL2NAL (Suyama et al., 2006) (see Misof et  
214 al., 2014) using the corresponding amino-acid MSAs as blueprint.

215 For phylogenetic analyses, we considered regions identified as protein clans, families,  
216 single domains or non-annotated regions (so called voids) as evolutionary units in the partitioned  
217 analyses. For a rationale see Misof et al. (2014). Using the Pfam database (Punta et al., 2012)  
218 release 28.0 (/, including only the Pfam-A database) in conjunction with the software  
219 pfam\_scan.pl version 1.5 and HMMER (Eddy, 2011) (), Domain-identification-v1.3 and  
220 Domain-parser-v1.4.1-dist, we identified 5,899 Pfam-A domains, and 8,719 void regions using  
221 the same strategy as described in Wipfler et al. (unpublished).

222 Parallel to the protein domain identification, putative ambiguously aligned or randomized  
223 MSA sections were identified for each amino-acid MSA with Aliscore (v.1.2) (Kuck et al., 2010;  
224 Misof & Misof, 2009) with the default sliding window size, the maximal number of pairwise  
225 sequence comparisons (option -r) and a special scoring for gap-rich amino-acid data (option -e).  
226 Using custom Perl scripts, the results from the protein domain identification step and the  
227 identified randomized MSA sections were merged into a masked supermatrix. Thus, the resulting  
228 supermatrix consists of data blocks with regions of putative alignment sections removed. The  
229 total alignment length spanned 1,235,884 amino-acid positions. A nucleotide supermatrix that  
230 exactly corresponds to the amino-acid supermatrix was created using several custom-made Perl  
231 scripts, resulting in a total alignment length of 3,707,652 nucleotide positions (details on the  
232 procedure are described in Peters et al. 2017).

233 In order to optimize these datasets, we removed data blocks with an information content  
234 (IC) of zero on amino-acid level as identified by MARE (v.0.1.2-rc) (Misof et al., 2013).  
235 Respective data blocks were also removed from the nt dataset. For this full nucleotide dataset we  
236 subsequently evaluated whether or not our datasets have evolved under globally stationary,  
237 reversible and homogeneous (SRH) conditions with SymTest version 2.0.47 () (Ho & Jermini,  
238 2004a). SymTest uses three matched-pairs tests of homogeneity; details are provided in Misof et  
239 al. (2014). We generated heat maps based on *p*-values obtained from the implemented Bowker's  
240 matched-pairs test of symmetry (Bowker, 1948) in order to determine those sequence pairs that  
241 could be assumed to have evolved under globally SRH conditions. We applied the implemented  
242 Bowker Test on the 1<sup>st</sup>, 2<sup>nd</sup> and 3<sup>rd</sup> codon position separately, on the 1<sup>st</sup> + 2<sup>nd</sup> and keeping all  
243 codon positions. Further downstream analyses were performed on the nucleotide dataset (data  
244 blocks with IC=0 removed) keeping the 2<sup>nd</sup> codon position only, as this showed a smaller  
245 among-lineage heterogeneity compared to the other datasets consisting of either only the 1<sup>st</sup> or  
246 only the 3<sup>rd</sup> codon positions or consisting of 1<sup>st</sup> + 2<sup>nd</sup>, or of all codon positions (see Figure S1 A-  
247 E). The final full nucleotide data with the 2<sup>nd</sup> codon position comprised 1,205,322 nt sites and  
248 1,546 partitions, i.e. merged data blocks according to the protein domain identified on the  
249 corresponding aa dataset and the selection of optimal partitions (see below). To further evaluate  
250 the coverage of this full nucleotide data with the 2<sup>nd</sup> codon position only with respect to pairwise



251 sequence coverage of (missing) data, we used AliStat v.1.6 () (Wong et al., 2017), see also Misof  
252 et al. (2014), and generated the respective heat map. In total, 2,145 pairs of sequences were  
253 compared and resulted in an overall completeness (C) score for the alignment (Ca) of 0.474262,  
254 with a maximum C-score for individual sequences (Cr\_max) of 0.979492 (*Zootermopsis*  
255 *nevadensis*) and a minimum C-score for individual sequences (Cr\_min) of 0.194385 (*Nyctibora*  
256 sp.) (see Figure S2).

257 For the amino-acid dataset, the data coverage was further increased by including only  
258 data blocks that contained sequence information for at least one representative of specified  
259 taxonomic groups (Table S4) using custom Perl scripts, for a rationale see Dell'Ampio et al.  
260 (2014) and Misof et al. (2014). This resulted in a decisive amino-acid dataset comprising 1,315  
261 data blocks and 585,040 amino-acid positions. We again checked whether or not this dataset  
262 matched SRH conditions using the Bowker's test implemented in SymTest 2.0.47, (see Figure  
263 S1F). We evaluated again the site coverage of this “decisive, optimized” amino-acid dataset with  
264 respect to pairwise sequence coverage of unambiguous data with AliStat (v.1.6). The  
265 completeness score for the complete alignment (Ca) was remarkably higher (Ca of 0.594592),  
266 with a maximum C-score for individual sequences (Cr\_max) of 0.982053 (*Zootermopsis*  
267 *nevadensis*) and a minimum C-score for individual sequences (Cr\_min) of 0.327783 (*Nyctibora*  
268 sp.) (see Figure S2B).

269

## 270 **S1.2 Phylogenetic inference and assessing support**

### 271 *Dataset partitioning*

272 In order to select the most appropriate number of partitions (i.e., merged data blocks), we  
273 used PartitionFinder 2.0.0 (prerelease 13) (Lanfear et al., 2016) in combination with the provided  
274 RaxML version. For the full nucleotide supermatrix with only data blocks with IC=0 removed  
275 but not further optimized / reduced, we applied a specific strategy to select the best-fit  
276 partitioning schemes and models of molecular evolution for the phylogenetic analyses. Because  
277 we used protein domains as an evolutionary unit, we first used the corresponding amino-acid  
278 supermatrix (data blocks with IC=0 removed, 66 taxa, 1,205,322 amino-acid positions and 3,916  
279 initial data blocks) to merge data blocks and to select the optimal partitioning scheme in  
280 PartitionFinder (Lanfear et al., 2016) (options --rclusterf --rcluster-max 8000 --rcluster-percent  
281 100 -q -p 28 --weights 1,1,0,1 -v --all-states --min-subset-size 100). This partitioning scheme  
282 search (merging data blocks) resulted in 1,546 partitions. Please note that the boundaries of the  
283 partitions identified on amino-acid level are equivalent to the boundaries we kept for the full  
284 nucleotide dataset. To select the best substitution model for each of these partitions on nucleotide  
285 level, we applied ModelFinder as implemented in IQ-TREE (v.1.5.0) (Kalyaanamoorthy et al.,  
286 2017); options -m TESTNEWONLY -gmedian. The best model for each partition was selected  
287 according to the Bayesian information criterion (BIC) (Schwarz, 1978). The full nucleotide  
288 alignment with the 2<sup>nd</sup> codon position only and data blocks with IC=0 removed and the  
289 corresponding partitioning scheme with the selected substitution models are deposited on Dryad  
290 (“S1.2\_Datasets”).

291 For the “decisive, optimized” amino-acid supermatrix, we again used PartitionFinder  
292 2.0.0 (prerelease 13) to select an optimal partitioning scheme (Lanfear et al., 2014; Lanfear et al.,  
293 2016) (options --reclusterf --recluster-max 4000 --recluster-percent 100 -q -p 24 --weights 1,1,0,1 -v  
294 --all-states --min-subset-size 100; note: the recluster-max is at least two times the number of  
295 initial partitions as recommended by the developers). We restricted the PartitionFinder search to  
296 eleven amino-acid substitution models as these are the most selected models for empirical  
297 studies on Hexapoda (Misof et al., 2014; Pauli et al., 2018; Peters et al., 2017), namely LG+G,  
298 WAG+G, DCMUT+G, JTT+G, BLOSUM62+G, LG+G+F, WAG+G+F, DCMUT+G+F,  
299 JTT+G+F, BLOSUM62+G+F, LG4X (Gu et al., 1995; Kosiol & Goldman, 2005; Le & Gascuel,  
300 2008; Müller & Vingron, 2004; Soubrier et al., 2012; Veerassamy et al., 2003; Whelan &  
301 Goldman, 2001; Yang, 1994). PartitionFinder revealed 592 partitions in this decisive amino-acid  
302 dataset. The decisive amino-acid dataset and the corresponding partitioning scheme with selected  
303 substitution models can be found on Dryad (“S1.2\_Datasets”).

304

### 305 *Tree search and bootstrapping*

306 Phylogenetic relationships were inferred under the maximum likelihood (ML) optimality  
307 criterion as implemented in IQ-TREE (v.1.4.4) (Chernomor et al., 2016; Nguyen et al., 2015)  
308 using the best scoring amino-acid substitution matrix or DNA substitution matrix respectively for  
309 each partition and the edge-proportional partition model allowing partitions to have different  
310 evolutionary rates (option –ssp). We performed 50 independent tree searches with a random start  
311 tree, taking the median for each rate category (–gmedian) and with an increased number of  
312 unsuccessful iterations before stopping (–numstop 200), and otherwise defaults. The resulting  
313 number of unique tree topologies was assessed with Unique Tree (v.1.9), kindly provided by  
314 Thomas Wong and available upon request. Maximum likelihood trees inferred from both  
315 datasets showed unique tree topologies, but differ only in the position of *Mastotermes* and  
316 *Zootermopsis*. The tree inferred from the decisive amino-acid dataset has *Mastotermes* as sister  
317 to all other termites and *Zootermopsis* as sister to all other Euisoptera (Figure 1), while tree  
318 inferred from the full nucleotide supermatrix has the positions of these taxa switched (Figure S3)  
319 (i.e., *Zootermopsis* sister to all other termites and *Mastotermes* sister to Euisoptera -  
320 *Zootermopsis*). Statistical node support was estimated via non-parametric bootstrapping of 100  
321 (nucleotide dataset) or 111 (amino-acid dataset) bootstraps replicates as implemented IQ-TREE  
322 version (v.1.4.4) with following settings: –gmedian –numstop 200 and otherwise defaults (e.g.  
323 parsimony start tree), and mapping them onto the ML tree with the best log-likelihood. We  
324 ensured bootstrap convergence (i.e. that a sufficient number bootstrap replicates had been drawn)  
325 with *a posteriori* bootstrap criteria (Pattengale et al., 2010) as implemented in RAxML (v.8.2.11)  
326 (Stamatakis, 2014) (settings:”autoMRE”, -B 0.01, --bootstop-perms=10000, performing the test  
327 10 times with different random seeds). Bootstrap convergence was fulfilled for all analyses and  
328 for both datasets after 50 bootstrap replicates.

329

330

### 331 *Rogue taxon analyses*

332 We tested analyses of both datasets (the full nucleotide dataset with only the second  
 333 codon position included and the decisive amino-acid dataset) for the presence of rogue taxa using  
 334 all inferred bootstrap trees with RogueNaRok (v.1.0) (Aberer et al., 2013). We applied four  
 335 distinct settings: (i) providing the best ML tree, (ii) majority rule consensus (50% threshold), (iii)  
 336 75% threshold consensus (the criterion for pruning rogue taxa is to improve the number of edges  
 337 that have at least 75% bootstrap support), and (iv) strict consensus (100% threshold). Results  
 338 revealed no rogue taxa in our datasets.

339

### 340 **S1.3 Identity and phylogenetic position of *Anallacta***

341 We obtained all samples of *Anallacta methanoides* (Illustration A) used for transcriptome  
 342 sequencing and morphological verification from one culture stock in Germany (; breeding of  
 343 Jörg Bernhard). Grandcolas (1996) originally placed *Anallacta* within Blattellinae based on  
 344 morphological data. Our phylogenetic analyses contradicted this placement and instead robustly  
 345 placed *Anallacta* as sister to Pseudophyllodromiinae. Since this placement was unexpected we  
 346 aimed to rule out misidentification, accidental sample swapping or contamination, which would  
 347 imply an erroneous placement.

348 Based on various lines of support, we confirmed that our specimen was *Anallacta* (likely,  
 349 *A. methanoides*). Our supporting evidence based on morphology and molecular analysis is as  
 350 follows.

351 Morphological evidence for the identity of a specimen from the same culture stock  
 352 (deposited in the MNHN-Paris as MNHNEP4277) is as follows:

- 353 1. colouration of our specimen matching illustration of *A. methanoides* by Shelford (1908).
- 354 2. colouration and gestalt identical to the holotype ()
- 355 3. spination of anterior-ventral margin of foreleg femur entirely with large spines ("well  
 356 armed" as noted by Shelford (1908))
- 357 4. hooked phallomere on left (Grandcolas, 1996)
- 358 5. styli long and cylindrical (Princis, 1963)
- 359 6. subgenital plate slightly asymmetrical, with narrow medial projection, and covered  
 360 mostly by preceding sternite (Princis, 1963)
- 361 7. "parasternite" inserted on left between subgenital plate and preceding segment (Princis,  
 362 1963)
- 363 8. genitalia similar to *Anallacta undata* as illustrated in Grandcolas (1996).

364

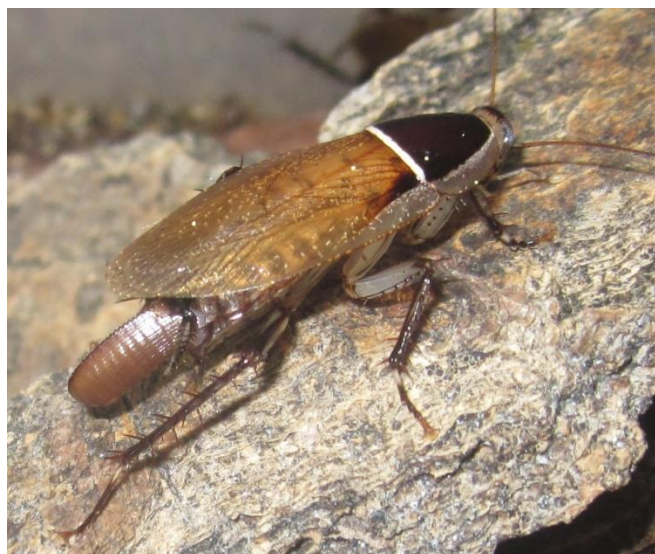

Illustration A. Adult female of *Anallacta methanoides* from a live culture. The individual is either producing or carrying an ootheca, with the keel oriented dorsally. The photo was kindly provided by Tristan Shanahan, see [invertebratedude.blogspot.com](http://invertebratedude.blogspot.com).

365  
366  
367  
368  
369  
370  
371

372 Furthermore, we reassessed the evidence for placement of *Anallacta* within Blattellinae.  
373 Grandcolas (1996) only provided an abbreviated character matrix without data specific to  
374 *Anallacta*. Our assessment based on morphological characters utilized in Grandcolas (1996)  
375 (Table S5) shows that the placement of *Anallacta* within Blattellinae is ambiguous. While the  
376 genital symmetry matches that of Blattellinae, the shape of sclerite L3d and R3d are consistent  
377 with Pseudophyllodromiinae. The definitions of other relevant characters in the genitalia and  
378 wing venation (see Table S5) are not clear enough to make a definitive determination of their  
379 states and assignment to either Blattellinae or Pseudophyllodromiinae.

380 We investigated the molecular support for this identification by comparing the  
381 Cytochrome Oxidase I (COI) gene extracted from the transcriptome sample used in our  
382 phylogeny and from DNA Sanger sequencing of COI of another sample of the same culture  
383 stock. We compared i) the DNA-Barcode sequence of COI extracted from the transcriptome  
384 assembly via a BLAST search of the transcriptome with a variety of cockroach COI sequences  
385 taken from NCBI and ii) the COI of an ethanol-preserved specimen from the same lab culture as  
386 the sample used for transcriptome sequencing. DNA sequencing was done with standard  
387 procedures and Sanger sequencing at the Zoological Research Museum A. Koenig (ZFMK),  
388 Bonn. The COI barcode regions were identical (see associated data on Dryad: “S1.4\_Anallacta”).

389 Altogether, we exclude any possibility of contamination and confirm that our sample in  
390 our best ML trees was indeed *Anallacta methanoides* (see also Discussion in the main text.)

391  
392

#### 393 **S1.4 Topology tests: Approximately Unbiased (AU) tests and Four-cluster** 394 **Likelihood Mapping (FcLM)**

395 We utilized two additional statistical approaches to evaluate support for alternative  
396 relationships: the Approximately Unbiased (AU) test (Shimodaira, 2002) and Four-cluster  
397 Likelihood Mapping (FcLM) (Strimmer & Haeseler, 1997). For both approaches we only used  
398 the decisive amino-acid dataset.

399 For the AU test, alternative tree topologies were constructed using Mesquite (v.3.1)  
400 (Maddison & Maddison, 2017). We removed branch lengths from the best ML tree and rooted  
401 the topology with Mantodea as outgroup. We then manipulated the tree formulating 13  
402 alternative topologies (described below for each tested topology). The AU test was conducted as  
403 implemented in IQ-TREE (v.1.5.5.) testing 14 topologies (including our best ML tree and the 13  
404 alternative topologies). We used the best ML tree found in our previous phylogenetic analysis  
405 (amino-acid dataset) as a starting tree, with the same partitioning and modeling schemes. We  
406 performed the test with 100,000 pseudoreplicates. Alternative topologies tested (including our  
407 best ML tree) are given in the associated tree-file on Dryad (“Blattodea\_AUtest\_trees.tre”).

408 In contrast to the AU test, FcLM only addresses single splits in a tree. Therefore, this  
409 approach enables identification of hidden signal for single relationships that may not be seen in  
410 ML trees or cannot be identified by AU tests. In cases where four monophyletic groups could not  
411 be defined with respect to the relationship of interest on the best ML tree (one group being the  
412 outgroup taxa - a prerequisite to perform FcLM) we only applied the AU Test. With FcLM, we  
413 therefore only tested the positions of i) *Lamproblatta* and ii) *Corydioidea* (see below). For each  
414 test, we defined four groups and included only partitions for which at least one representative  
415 species of the addressed groups was present. Taxa that did not address a particular hypothesis  
416 were discarded from the alignment (see Table S6 for included species, group definitions are  
417 described below). We additionally checked for confounding signal due to among-lineage  
418 heterogeneity, non-random substitution processes and/or distribution of missing data using the  
419 FcLM approach with permuted datasets with phylogenetic signal destroyed, for a rationale see  
420 Sann et al. (2018) and Misof et al. (2014). FcLM analyses were performed using IQ-TREE  
421 version 1.6.beta4. Confounding signal due to not fulfilling stationary, reversible and  
422 homogeneous (SRH) conditions (Ho & Jermiin, 2004b; Jermiin et al., 2004) and/or non-  
423 randomly distributed missing data might affect FcLM results of the original data and  
424 phylogenetic tree inference. To check for potential confounding signal, we permuted both  
425 original FcLM datasets in three ways: i) destroying phylogenetic signal but keeping the among-  
426 lineage heterogeneity and non-randomly distributed missing data, ii) destroying phylogenetic  
427 signal, making the dataset homogeneous among lineages but keeping non-randomly distributed  
428 missing data and iii) as ii) but randomly distribute missing data. As substitution model, we used  
429 LG for each partition. For a more detailed description on the procedure and settings, see e.g.  
430 Simon et al. (2018) and Misof et al. (2014). Group definitions for the two FcLM tests are given  
431 in Table S6. Respective species included in each group, and number of drawn quartets are



432 provided in Table S6. Proportions of quartets that mapped into respective areas in a 2D simplex  
 433 graph are provided in Figure S4.

434 Below we describe the rationale for alternative hypotheses being tested. We present  
 435 results of all alternative phylogenetic relationships of specific taxa tested with the AU test and/or  
 436 FcLM approaches whenever possible. For each AU test we name the alternative hypotheses as  
 437 “AUTree #”’s, which correspond to alternative hypotheses numbered in Table S7 and file folder  
 438 “S1.3\_AU\_Tests” on Dryad. See Table S6, Figure S4 and Table S7 for further details.

### 439 **1) Position of *Lamproblatta* (FcLM and AU test)**

440 The position of *Lamproblatta* (as a representative of Lamproblattidae) is of particular  
 441 interest because of a unique behavioral synapomorphy shared by *Cryptocercus* and *Lamproblatta*  
 442 (McKittrick, 1964), and *Lamproblatta*’s unique genital morphology. However, phylogenetic  
 443 studies have been conflicting: Djernæs et al. (2015) support the relationship of *Lamproblatta* as  
 444 sister to the remaining Blattoidea, or sister to *Tryonicus* and *Cryptocercus* + Isoptera. Legendre  
 445 et al. (2015) support the relationship of *Lamproblatta* as sister to Cryptocercidae and termites.  
 446 The latter was confirmed by our ML analysis of the decisive amino-acid dataset supporting  
 447 *Lamproblatta* as sister to *Cryptocercus* + Isoptera with maximal support.

448 Applying the AU test, two alternative topologies mentioned in Djernæs et al. (2015) were  
 449 significantly rejected ( $p=0.00$ ): i) *Lamproblatta* as sister to Blattoidea and ii) *Lamproblatta* as  
 450 sister to *Tryonicus*, this clade being sister to Blattidae (see AUTree #2 and #3; Table S7 and S1  
 451 file folder “S1.3\_AU\_Tests” on Dryad).

452 FcLM results showed 78.6% of all quartets were unambiguous for *Lamproblatta* +  
 453 Tutricablattae (T1) as inferred in our analyses and as suggested by Legendre et al. (2015). One  
 454 fifth of all quartet’s (21.1%) supported *Lamproblatta* + Blattoidae (T2), earlier inferred by  
 455 Djernæs et al. (2015). There was nearly no support (0.3%) for *Lamproblatta* as sister to  
 456 remaining Blattoidea (T3), (also inferred by Djernæs et al. 2015). The majority of quartets  
 457 supporting *Lamproblatta* + Tutricablattae could not be explained by confounding signal (Figure  
 458 S4). Therefore, we consider the placement of *Lamproblatta* as sister to Tutricablattae as robust  
 459 and not biased.

### 460 **2) Position of *Tryonicus* (AU test)**

461 *Tryonicus* (as a representative of Tryonicidae) is a unique lineage of Blattoidea and has  
 462 been proposed as a close relative of Kittrickia or Tutricablattae. Djernæs et al. (2015) support  
 463 the relationship of *Tryonicus* as sister to *Cryptocercus* + Isoptera (Tutricablattae) but this was  
 464 highly dependent on modeling and partitioning strategy (Djernæs et al., 2015). The best trees  
 465 presented by Legendre et al. (2015) and Bourguignon et al. (2018) both place *Tryonicus* in clades  
 466 sister to Blattidae (or Blattidae + other Tryonicidae).

467 We tested the position of *Tryonicus* by comparing three topological scenarios: Blattoidae  
 468 (*Tryonicus* + Blattidae) (AUTree #1, our best ML tree from the decisive aa dataset), *Tryonicus* +  
 469 Tutricablattae (AUTree #4) (Djernæs et al., 2015), *Tryonicus* + *Lamproblatta* with this clade  
 470 being sister to Tutricablattae (AUTree #5) (Djernæs et al., 2015; Wang et al., 2017), as well as

471 *Lamproblatta* sister to Blattidae and *Tryonicus* sister to Tutricablattae (AUTree #6). All  
472 alternative topologies (AUTree #4-6) were significantly rejected ( $p=0.00$ ). Therefore, we  
473 consider the position of *Tryonicus* as sister to Blattidae as robust under the AU test.

### 474 **3) Position of *Mastotermes* (AU test)**

475 The position of *Mastotermes* and *Zootermopsis* was incongruent between the best tree  
476 inferred from the decisive amino-acid and the full nucleotide dataset. The tree reconstructed from  
477 the decisive amino-acid dataset and that inferred from our nucleotide dataset differ with respect  
478 to which lineage is sister to the remaining termites (*Mastotermes* in the former and *Zootermopsis*  
479 in the latter). Other studies have provided little evidence for any relationship other than  
480 *Mastotermes* as sister to all other termites (e.g. Bourguignon et al., 2015; Djernæs et al., 2015;  
481 Klass & Meier, 2006; Legendre et al., 2015; but see Wang et al. 2017). Note that it was possible  
482 to test the position of *Mastotermes* with FcLM but due to the low number of possible quartets  
483 (only four) we considered this test as meaningless and only utilized the AU test to assess the  
484 alternative topologies.

485 Specifically, we tested: i) *Mastotermes* as sister to (*Zootermopsis* + all remaining  
486 termites) (as in our best ML tree derived from the amino-acid dataset; AUTree #1); ii)  
487 *Zootermopsis* + (*Mastotermes* + remaining termites) (AUTree #7) and iii) and (*Mastotermes* +  
488 *Zootermopsis*) as sister to remaining termites (AUTree #8) (Wang et al., 2017). While topology  
489 (iii) was rejected: (*Mastotermes* + *Zootermopsis*) as sister to remaining termites (AUTree #8),  
490 topology (ii): *Zootermopsis* + (*Mastotermes* + remaining termites) (AUTree #7) could not be  
491 rejected ( $p=0.2942$ ). This implies incongruent signal in the amino-acid dataset, which is already  
492 displayed by low statistical support. Therefore, we consider the position of *Mastotermes* and  
493 *Zootermopsis* relative to all other termites as not strongly supported by our dataset. Thus our  
494 transcriptome data are not sufficient to make unambiguous conclusions about the earliest splits in  
495 Isoptera. One way to identify the conflicting signal could be to include orthologous data of  
496 considerably more termite species and perform analyses with the FcLM approach. See main text  
497 (Results and discussion: Phylogenetic relationships) for further discussion.

### 498 **4) Position of Corydioidea (FcLM)**

499 Two hypotheses have been repeatedly proposed in molecular phylogenetic studies: i)  
500 Blaberoidea + (Corydioidea + Blattoidea) (Djernæs et al., 2015; Legendre et al., 2015),  
501 confirmed by both our ML trees with Corydioidea being sister to Blattoidea with maximal  
502 support. ii) Corydioidea + (Blattoidea + Blaberoidea) has been suggested by Inward et al, (2007)  
503 and Wang et al. (2017). Morphological studies of Corydioidea have largely been misleading on  
504 their phylogenetic position (Grandcolas, 1996; Grandcolas, 1999; Klass & Meier, 2006),  
505 possibly due to extreme morphological differentiation causing problems with homology  
506 assignment.

507 Here we only applied the FcLM approach since it has advantage of discerning the source  
508 of possible incongruence, which is not possible with the AU test. Species included in respective  
509 groups are provided in Table S6, possible topologies and results are provided in Figure S4.

510           Around 4/5 of all quartets supported the relationship we inferred in both ML trees:  
 511 Corydioidea + Blattoidea (T2: 82.4%). There was nearly no support for Corydioidea +  
 512 Blaberoidea (T1: 0.8%), and small support (16.5%) for Corydioidea as sister to remaining  
 513 Blattodea (seen in Wang et al. 2017). Corydioidea + Blattoidea could not be explained by  
 514 confounding signal (Figure S4 F-H). Therefore, we consider the position of Corydioidea as sister  
 515 to Blattoidea (and thus Blaberoidea as sister to all other Blattodea) as robust under the FcLM test  
 516 and strongly supported by our data.

#### 517 **5) Position of *Ectobius* (AU test)**

518           Ectobiinae is suggested as sister to all remaining Blaberoidea in Wang et al. (2017), sister  
 519 to Pseudophyllodromiinae in Inward et al. (2007) and Legendre et al. (2015), and sister to  
 520 Blaberidae + Pseudophyllodromiinae in Djernæs et al. (2012) and Djernæs et al. (2015).

521           We tested the following two hypotheses (*Ectobius* as a representative of Ectobiinae): i)  
 522 *Ectobius* as sister to all other Blaberoidea (AUTree #1), ii) *Ectobius* as sister to Nyctiborinae +  
 523 Blattellinae (AUTree #12; to our knowledge, this has not been proposed by any study, but we  
 524 consider it as a possible evolutionary scenario) and iii) *Ectobius* as sister to  
 525 (Pseudophyllodromiinae + *Anallacta*) (AUTree #13) (Inward et al., 2007; Legendre et al., 2015).  
 526 Both topologies (ii) and (iii) were significantly rejected (p=0.00). Thus, *Ectobius* as sister to the  
 527 remaining Blaberoidea is robustly supported by our data under the AU test.

#### 528 **6) Position of *Anallacta* (AU test)**

529           *Anallacta* has only once been included in a molecular phylogenetic study (Bourguignon  
 530 et al., 2018) who suggested this taxon as sister to Ectobiinae. Analyzing morphological data, it  
 531 was placed within Blattellinae by Princis (1969). This morphology-based classification was  
 532 supported by Grandcolas (1996). However, he did not report the data specific for *Anallacta* and  
 533 the reasoning is unclear, so it cannot be scrutinized. Morphologically, our specimens of  
 534 *Anallacta methanoides* have genital symmetry common to most Blattellinae (with the hook on  
 535 the left) but l3d is not ring shaped, which is consistent with Pseudophyllodromiinae (see section  
 536 S1.3).

537           We inferred *Anallacta* as sister to Pseudophyllodromiinae in both ML trees, with  
 538 maximal support, thus not within Blattellinae. With the AU test we compared: *Anallacta* as sister  
 539 to Pseudophyllodromiinae (AUTree #1) and *Anallacta* as sister to Blattellinae (AUTree #9). The  
 540 latter was significantly rejected (p=0.00). Thus, our recovered relationship of *Anallacta* as sister  
 541 to Pseudophyllodromiinae is robust and supported by our data under the AU test.

#### 542 **7) Position of Pseudophyllodromiinae (AU test)**

543           Pseudophyllodromiinae was proposed as sister to Blattellinae (Wang et al., 2017), sister  
 544 to Blaberidae (Djernæs et al., 2012; Djernæs et al., 2015) or to Ectobiinae (Inward et al., 2007;  
 545 Legendre et al., 2015). We tested: (i) Pseudophyllodromiinae (including *Anallacta*) as sister to  
 546 (Blattellinae + Nyctiborinae) + Blaberidae (AUTree #1), (ii) Pseudophyllodromiinae sister to  
 547 Blaberidae (AUTree #14) (Djernæs et al., 2012; Djernæs et al., 2015) and (iii)



548 Pseudophyllodromiinae as sister to all other Blaberoidea (AUTree #12; discussed above).  
 549 Topologies (ii) and (iii) were significantly rejected ( $p=0.00$ ). Thus, our recovered position of  
 550 Pseudophyllodromiinae (including *Anallacta*) as sister to all Blaberoidea except *Ectobius* is  
 551 robustly supported by our data under the AU test.

## 552 **8) Position of Oxyhaloinae (AU test)**

553 Blaberidae might be the most problematic group in terms of phylogenetic understanding  
 554 (Evangelista et al., 2017; Legendre et al., 2017) as multiple studies, morphological and  
 555 molecular, recover widely differing topologies of Blaberidae (Grandcolas, 1997; Grandcolas,  
 556 1998; Legendre et al., 2017; Legendre et al., 2015; Maekawa et al., 1999). The only apparently  
 557 well-established relationships are (Blaberinae + Zetoborinae) and (Panesthiinae +  
 558 Geoscapheinae). Even suggestions made by Evangelista et al. (2017) based on a comprehensive  
 559 review are likely incorrect considering the result of this study. We tested the position of  
 560 Oxyhaloinae in two different topological scenarios.

561 We tested: (i) Oxyhaloinae as sister to *Diploptera* (AUTree #1; Bourguignon et al.  
 562 (2018)), (ii) Oxyhaloinae as sister to Blaberinae + Zetoborinae (with *Diploptera* as sister to the  
 563 remaining Blaberidae) (# tree 10) and Oxyhaloinae as sister to (Blaberinae + Zetoborinae) with  
 564 (Panchlorinae + Gyninae) as sister to the remaining Blaberidae (AUTree #11). Both (ii) and (iii)  
 565 were significantly rejected ( $p=0.00$ ). Thus, our recovered position of Oxyhaloinae as sister to  
 566 *Diploptera* is considered robust under the AU test given our data.

567

## 568 **S1.5 Divergence time estimation**

### 569 *Fossil calibrations and maximum bounds*

570 We selected nine fossils (Table S8; Figure S5) to calibrate our divergence-time analysis.  
 571 All the calibrations except one (see below), including the root age, were set to hard maximum  
 572 bound at 412 million years ago (MYA) using uniform priors (Figure S6). We chose uniform  
 573 priors because we had little information from the fossil record to suggest the shape or  
 574 parameterization of other distributions. We selected the oldest age of Rhynie Chert (Mark et al.,  
 575 2013) as the maximum root age because it is a diverse fossil deposit of many well-preserved  
 576 plants and animals, but lacks winged-insects, and predate all known winged-insect fossils  
 577 (Trewin, 2008). However, younger ages have been considered for this deposit (Schachat, 2018).  
 578 Furthermore, predating the origin of tree-form plants (e.g. tree ferns) precludes the possibility  
 579 that primitive gliding behaviors observed in non-winged hexapods (Dudley & Yanoviak, 2011;  
 580 Yanoviak et al., 2009) might have evolved. If this behavior is a preadaptation to the evolution of  
 581 wings in insects as proposed by Yanoviak et al. (2009), it further supports this as an upper age  
 582 limit for Polyneoptera and all winged insects (Pterygota). The only node given a different  
 583 maximum age was calibrated by *Archeorhinotermes rossi* (representing the ancestor of  
 584 Neoisoptera), which we set to have a soft maximum bound at the oldest limit of the Carnian  
 585 stage (237 MYA). The abundance of described termite fossil taxa (Grimaldi & Engel 2005) since  
 586 ~130 MYA shows that identifying termites in extinct faunas is straightforward (when they

587 occur). Therefore, we assume absence in fossil deposits as evidence that termites had not evolved  
588 and were not present yet in the Carnian stage. Additionally, this soft maximum provides a ~100-  
589 million-year gap before the earliest verified termite fossil and a gap of at least 30 million years  
590 prior to the oldest estimate for the origin of termites (see Figure 2). Minimum soft bounds were  
591 selected based on the fossil calibrations (see Supplementary material S2).

592

### 593 *Estimating divergence times*

594 We used two datasets for divergence date inference: i) the unreduced decisive amino-acid  
595 alignment as used for tree inference and ii) a reduced version of this dataset only containing sites  
596 with unambiguous data for at least 95% of the 66 taxa (i.e. “reduced decisive amino-acid  
597 dataset”). To reduce computational effort, we chose an unpartitioned dating analysis. We ran  
598 divergence time analyses on both versions of the unpartitioned dataset using MCMCTree  
599 implemented in the software package PAML v.4.9 (Yang & Rannala, 2006). To tailor our  
600 modeling scheme to an unpartitioned analysis with substitution matrices implemented in PAML,  
601 we estimated the best scoring model for both unpartitioned datasets in IQ-TREE (v. 1.5.0). We  
602 restricted the search to the following models as these are available in PAML, options: -m  
603 TESTONLY -mset Dayhoff,JTT,WAG,mtREV,mtMAM -gmedian. JTT was determined as best  
604 scoring model for both datasets. Thus, we set the model JTT (aaRatefile = jones.dat) + G with 5  
605 rate categories, empirically estimated base frequencies (model = 2) and allowed rates to be  
606 inferred from individual sites (RateAncestor = 1). We conducted Hessian matrix calculations  
607 according to the above specifications with CODEML as implemented in PAML using empirical  
608 +F base frequencies estimated from the respective dataset. Model parameters were specified as  
609 follows: chronograms for both datasets were estimated under the correlated independent rates  
610 clock model as done by Peters et al. (2017). MCMC chains ran for 1,000,000 generations (sfreq  
611 = 10) while discarding a burn-in of 100,000 generations. The software package TRACER v1.6  
612 (Rambaut et al., 2018) was used to check for sufficient effective sample size (ESS > 200) for all  
613 parameters. For each of the datasets we ran the analysis in four independent replicates to further  
614 ensure that parameter space had been searched thoroughly. For each dataset, posterior mean time  
615 estimates, as well as lower and upper confidence intervals (CI), from all four independent runs  
616 were plotted against each other to check for MCMC chain convergence. All runs converged for  
617 both datasets (see Figure S7 & S8). From the four replicates of each dataset, we choose posterior  
618 means and CI of one randomly selected run, since all four replicates delivered effectively  
619 identical results. The inferred dates and 95% confidence intervals (CI) from all dated trees can be  
620 found on Dryad (“S1.5\_Dating”).

621 Since effective priors in divergence time analyses can strongly deviate from the specified  
622 priors (Warnock et al., 2015), we checked that our effective priors were not conflicting with the  
623 fossil calibrations. Therefore, we ran our analyses as specified above but without molecular data  
624 (i.e., prior-only analysis as described in the PAML documentation and MCMCTree Tutorial; dos  
625 Reis et al., 2017; Nascimento et al., 2017). Our effective priors did overlap with specified priors  
626 in all cases (Figure S6). For all calibrations, the 95% CI of the recovered posteriors fell within

627 limits of the specified prior and the effective prior. However, the mean of the effective prior  
628 distribution of the clade calibrated by the fossil “*Gyna*” *obesa* was exceptionally disjoint from  
629 the minimum age calibration. Hence, we chose a slightly older age justification for this fossil (60  
630 MA; see Supplementary material S2.3 for details of the disagreement) to account for a potential  
631 underestimate for the minimum age calibration. We also tested the alternative, younger age (57.7  
632 MA). The results of this test are given in Table S9 and discussed briefly below.

633 Since there were ambiguities in the ages of a few fossils used for calibration  
634 (Supplementary material S2) we checked whether or not these discrepancies had any effect on  
635 the inferred posterior mean ages and CIs. Therefore, we ran the divergence time analyses again  
636 using alternate calibration ages (“alternate minimum calibration ages”; see Table S9 for original  
637 and alternative ages for all three nodes), but restricted to one run and only for the reduced  
638 dataset. The results did not significantly deviate from the original analysis of the reduced  
639 decisive amino-acid dataset (Table S9). Thus, the discrepancy in fossil age estimates was too  
640 small to have a significant effect on our inferred dates.

641 We deem the final results of the dating analysis to be robust to missing data patterns, and  
642 uncertainties in ages of the calibrating fossils. Our inferred ages are generally younger than  
643 estimates from previous studies (main text Figure 2; discussed in main text section “The timing  
644 of Blattodea’s origins”). Although young, these age estimates still agree with the fossil record,  
645 and close or bridge the large gap between molecular estimates of divergence and the last known  
646 fossil remains (main text Figure 2). The width of such gaps is exacerbated by the inability to  
647 describe known fossils lacking preserved diagnostic characters. In one extreme example, the  
648 node calibrated by *Archeorhinotermes rossi*, two-thirds of the confidence interval (including the  
649 mean) of the divergence time estimate are younger than the minimum soft-bound calibration for  
650 that node (main text Figure 1&2). This could indicate a shift in substitution rates sometime in the  
651 early history of Isoptera (see Legendre & Condamine, 2018) or be due to a lack of data on the  
652 wing morphology of stem-Cryptocercidae and stem-Lamproblattidae preventing an accurate  
653 placement of *Valditermes brenanae*, which is a calibrating fossil. Although such scenario has  
654 never before been considered, it is possible that stem-Kittrickia possessed wings with a humeral  
655 suture (see Supplementary material S2.1; both Cryptocercidae and Lamproblattidae entirely lack  
656 wings). If this bold proposition was true, *Valditermes brenanae* might be placed as stem-  
657 Tutricablattae as opposed to stem-Isoptera. Interestingly, an analysis discussed below (section  
658 S3.4) provides evidence that stem-Tutricablattae may have dropped their wings in the manner of  
659 extant termites.

660

## 661 **S1.6 Inferring the presence of *Blattabacterium* within transcriptome data**

### 662 *Current understanding of Blattabacterium in Blattodea*

663 *Blattabacterium* are bacteroids that are exclusively obligate endocellular mutualists with  
664 many cockroach groups. They synthesize amino-acids and recycle nitrogenous wastes for their  
665 hosts (Patino-Navarrete et al., 2013; Sabree et al., 2009; Tokuda et al., 2013). This enables their  
666 hosts to have a broad physiological repertoire because the symbionts assist in storing nitrogenous

667 wastes (which are toxic and normally a waste product) in fat body cells that can be metabolized  
668 in times of nutrient stress (Clark & Kambhampati, 2003; Mullins & Cochran, 1976). Stored  
669 nitrogenous wastes also serve as a resource for both maternal and paternal investment in their  
670 progeny (Mullins et al., 1992; Schal & Bell, 1982). The biology of *Blattabacterium* and  
671 coevolution with cockroaches has been studied extensively (e.g. Clark & Kambhampati, 2003;  
672 Patino-Navarrete et al., 2013; Sabree et al., 2009; Tokuda et al., 2013). Although  
673 *Blattabacterium* does not occur in all cockroach species, the ones that they do occur in strongly  
674 rely on them (Guthrie & Tindall, 1968). *Blattabacterium* is known to be absent from *Nocticola*  
675 and all termites with the exception of *Mastotermes* (Clark & Kambhampati, 2003; Lo et al.,  
676 2003; Mullins, 2015). Yet, only a limited number of species have been surveyed in prior studies  
677 (Clark & Kambhampati, 2003; Clark et al., 2001; Kinjo et al., 2018; Lo et al., 2003; Milburn,  
678 1966; Patino-Navarrete et al., 2013; Sabree et al., 2009; Tokuda et al., 2013). We assessed the  
679 presence of *Blattabacterium* in the transcriptome data of 44 Blattodea species, two Mantodea,  
680 and 17 other Polyneoptera outgroups included in this study.

681

### 682 ***BLAST survey for Blattabacterium***

683 We compiled a series of reference sequences from the UniProt database  
684 (The\_Uniprot\_Consortium, 2015). The reference dataset consisted of 50 genes, of which 20 are  
685 known from *Blattabacterium*. To differentiate between host, *Blattabacterium*, and non-target  
686 endosymbiont transcripts we included ~770 total protein sequences from a wide variety of  
687 metazoan and non-metazoan organisms (see DRYAD data “S1.6\_Blattabacterium” for full list).  
688 We performed a BLAST search of each reference sequence against each of the transcriptomes,  
689 which we treated as databases for the tBLASTn function in BLAST+ (Camacho et al., 2009).  
690 From the results we removed all hits with E-values > 0.1 resulting in 165,865 remaining hits.  
691 Among the multiple hits for a given protein within a transcriptome, we chose the sequence with  
692 the highest alignment score to be part of the final dataset. We manually checked the output and  
693 ensured that a single fragment was not identified as more than one protein type. We then  
694 extracted all hits attributed to *Blattabacterium* and used BLAST for each one against the entire  
695 NCBI nucleotide collection. Any sequences whose top BLAST result was for *Blattabacterium*  
696 was counted as a positive result.

697 Table S10 shows the presence and absence of *Blattabacterium* in transcriptome data of  
698 species included in this study. The associated spreadsheet (“S1.6\_Blattabacterium”) shows all  
699 detailed results per organism.

700

### 701 ***Blattabacterium presence in transcriptomes***

702 The results show evidence for the presence of *Blattabacterium* in all non-termite  
703 cockroaches except *Diploptera* sp., *Tivia* sp., *Nocticola* sp. and *Lamproblatta albipalpus*. As  
704 expected, no termites were found to have *Blattabacterium* except for *Mastotermes darwiniensis*.  
705 The lack of the bacteroids within the other non-termite cockroaches (*Lamproblatta albipalpus*,  
706 *Diploptera* sp. and *Tivia* sp.) is surprising, while there has been reported a lack of

707 *Blattabacterium* already for the genus *Nocticola* (Lo et al. 2003) and is considered as  
708 independent loss. We also corroborate the absence of *Blattabacterium* in Mantodea and other  
709 Polyneoptera.

710         While the nature of our data allows inference of the presence of endosymbionts, inferring  
711 absence is more difficult. For instance, we cannot exclude the possibility that the absence of  
712 BLAST hits could be due to insufficient sequencing, low gene expression or assembly errors.  
713 Indeed, we did not find *Blattabacterium* in the *Diploptera* sp. transcriptome but this sample had  
714 very low starting genomic material (see S1.1 Molecular dataset generation). Of course, further  
715 analysis is needed to verify this. Therefore, BLAST should not be considered as a standard of  
716 evidence by which we confidently identify symbionts in organisms. It is rather an initial  
717 screening, which should be followed up with microscopy or other cytological methods, which  
718 was not feasible in our study and would go beyond our scope. Thus we consider the occurrence  
719 of the symbionts as preliminary suggestions and should be investigated in future studies by more  
720 sophisticated molecular methods as well as other methods, e.g. microscopy or other cytological  
721 methods.  
722

723 **Figures**724 **Figure S1**

725 **Heat maps show pairwise Bowker's tests visualizing among-lineage heterogeneity as**  
 726 **implemented in SymTest 2.0.47.** P-values  $> 0.05$  coloured in white indicate sequence pairs that  
 727 fully match SRH conditions. SymTest was run for the full dataset on nucleotide level after  
 728 removal of uninformative partitions (**A-E**) and for the decisive dataset on the amino-acid level  
 729 (**F**). Heat map of the nucleotide dataset including **A**) all codon positions, **B**) 1st and 2nd codon  
 730 position, **C**) 1st codon position only, **D**) 2nd codon position only, **E**) 3rd codon position only. **F**)  
 731 Heat map of the decisive amino-acid dataset. The nucleotide dataset only including the 2nd  
 732 codon position and the amino-acid dataset show less model violation compared to other datasets  
 733 and were thus used for further downstream analyses.

734

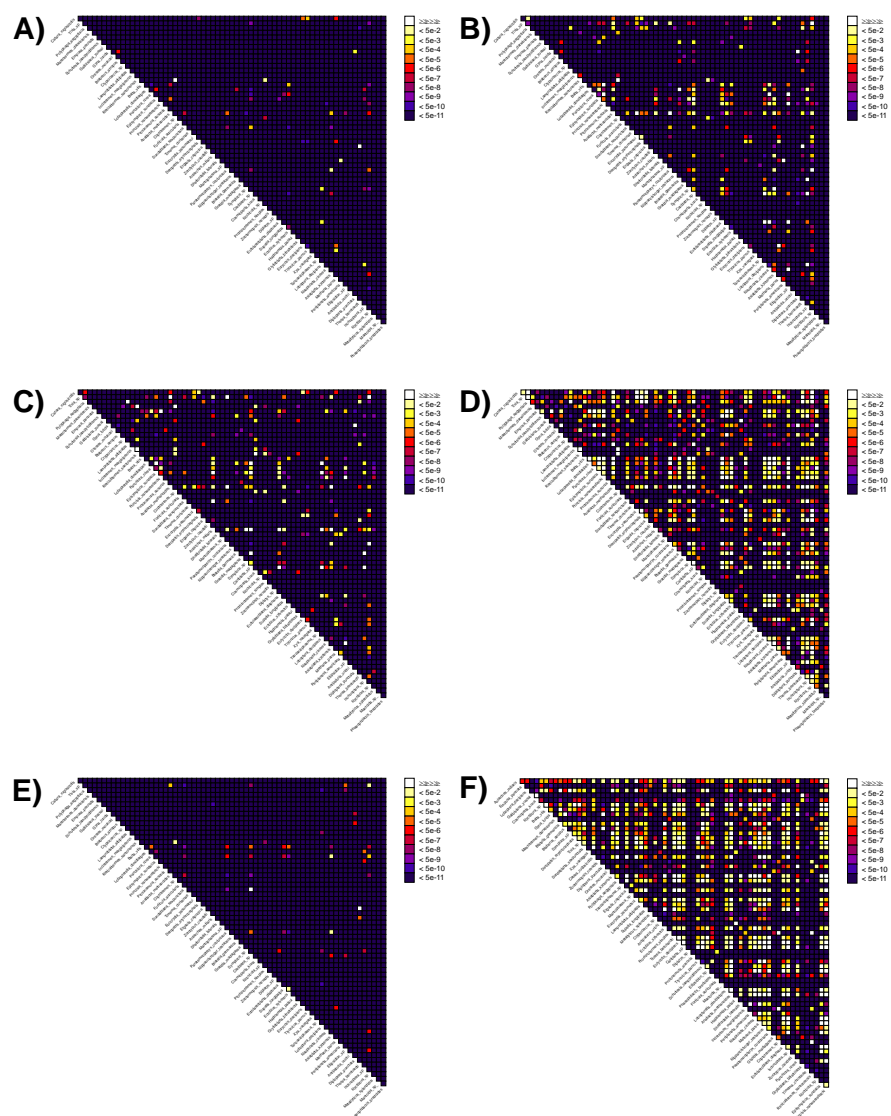

735



736 **Figure S2**  
 737 **Heat maps show species-pairwise site coverage. A)** Full nucleotide dataset including only 2nd  
 738 codon positions, and **B)** decisive amino-acid dataset as inferred with AliStat. Low shared site  
 739 coverage coloured in shades of red; high shared site coverage in shades of green. Pairs of  
 740 sequences, and completeness scores are provided in the text.  
 741

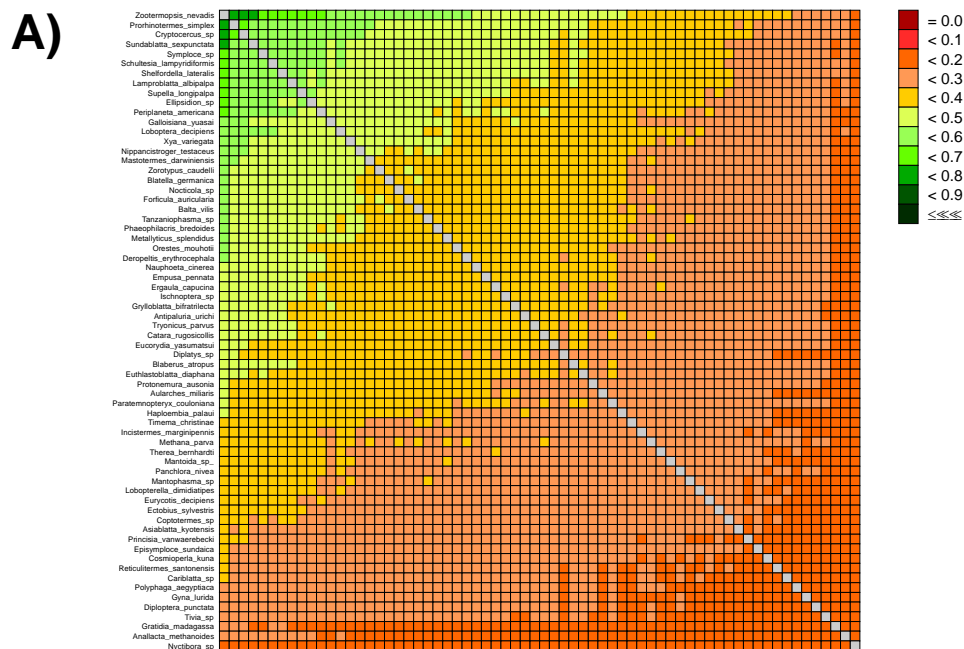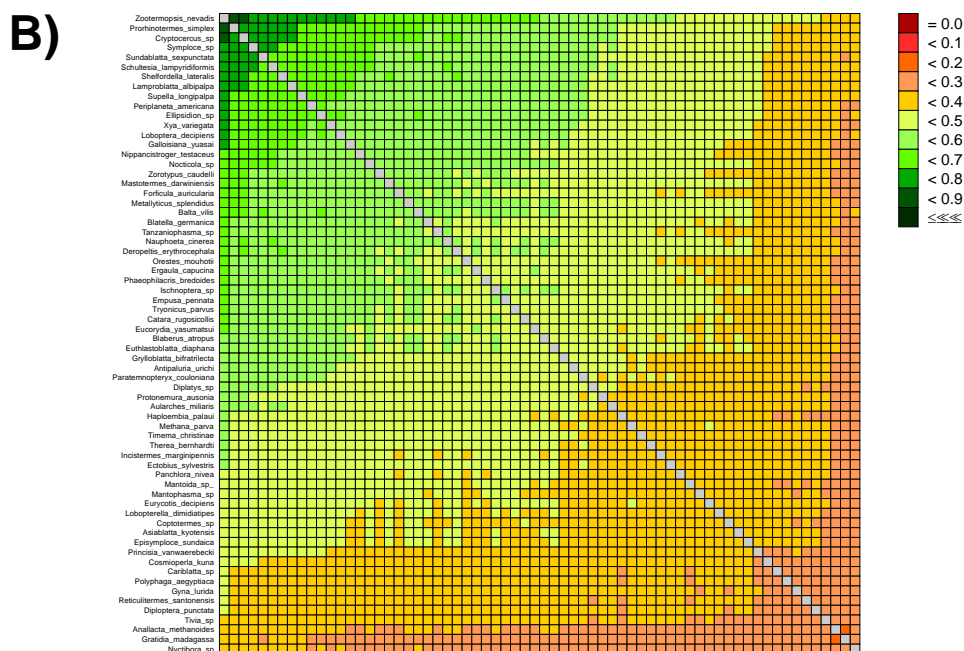

743 **Figure S3**  
 744 **Best ML tree (phylogram) inferred from the full nucleotide dataset with 2nd positions only**  
 745 **with bootstrap support mapped onto the best tree.** The relationships in the tree are identical to  
 746 those in Figure 1 (inferred from the decisive amino-acid dataset) except for the position of  
 747 *Mastotermes* and *Zootermopsis* relative to other termites and the position of *Zorotypus*.

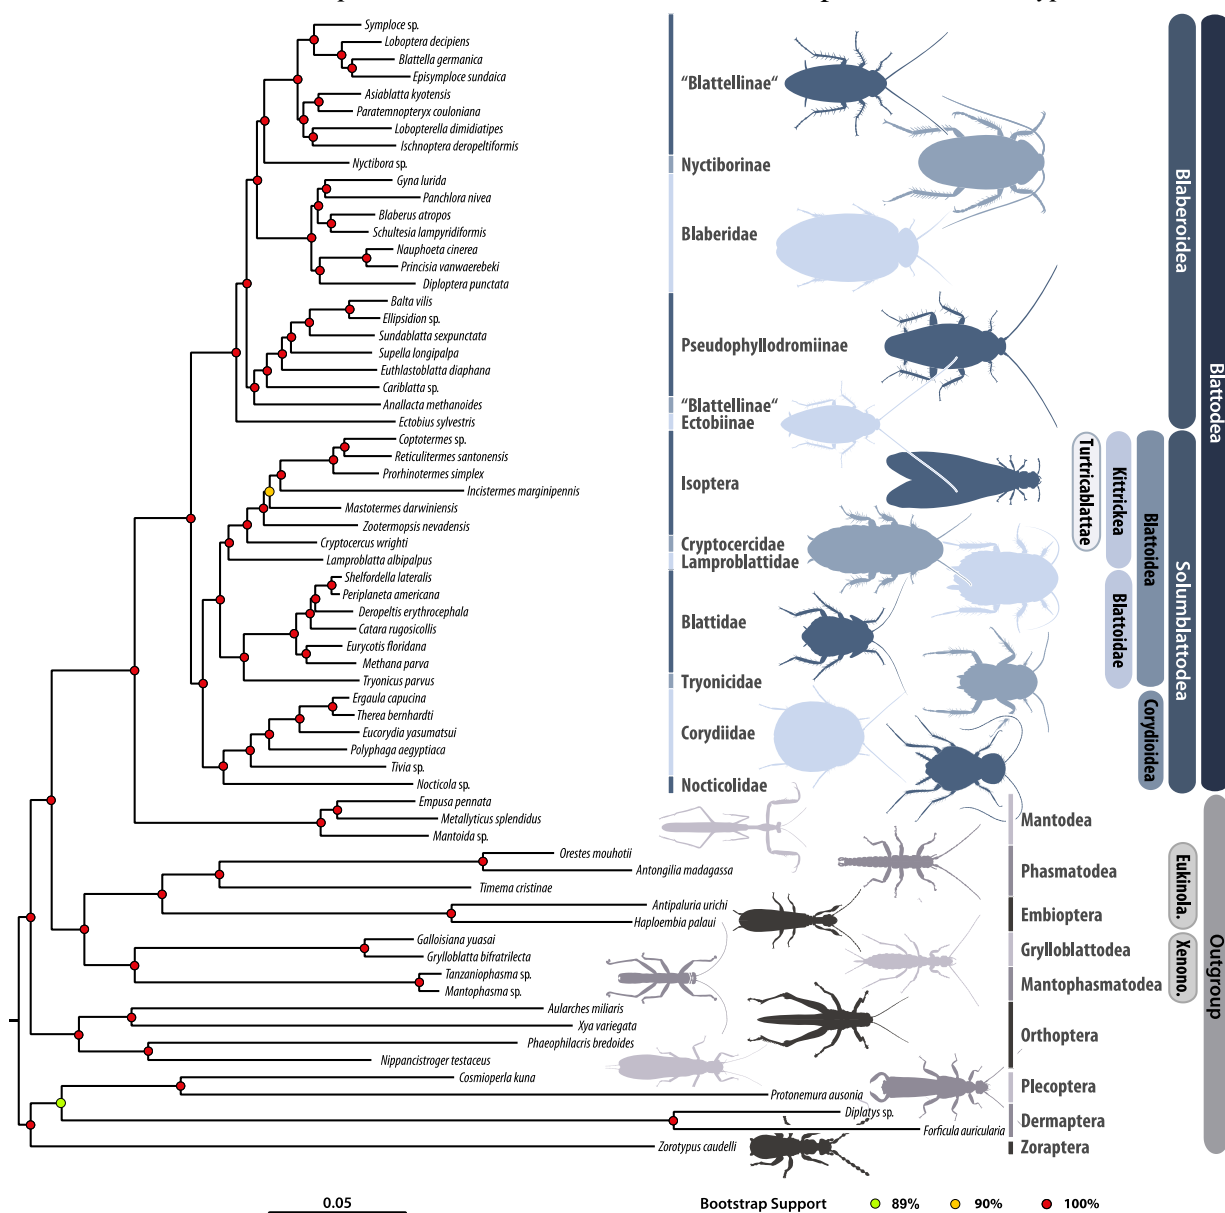

748  
 749  
 750  
 751



752 **Figure S4**

753 **FcLM results of original and permuted data.** Given are proportions of quartets (in %) that  
754 map into respective Voronoi-cells (2D simplex graph). T1 (area 1): unambiguous support for  
755 G1,G2 – G3,G4 marked in dark blue/blue. T2 (area 2): unambiguous support for G1,G3 – G2,G4  
756 marked in dark red/red. T3 (area 3): unambiguous support for G1,G4 – G2,G3 marked in  
757 orange/yellow. Marked in grey: T12 (area 4), T13 (area 6) and T23 (area 5) provide ambiguous  
758 support and quartets mapped into T\* (area 7) are not resolved (star-like). **A-D)** Testing the sister  
759 relationship between *Lamproblatta* and Tutricablattae based on the decisive amino-acid  
760 alignment (585,040 amino-acid sites, 592 partitions, number of quartets: 294, see Table S6). T1  
761 (indicated by a \$) was supported in our best ML tree. Lamp: Lamproblattidae (group 1); Turt:  
762 Tutricablattae (group 2); Blatt: Blattoidea (group 3), Cory: Corydioidea used as outgroup taxa **A)**  
763 non-permuted, original data, **B)** permutation I, **C)** permutation II, **D)** permutation III. **E-H)**  
764 Testing the sister relationship between Corydioidea and Blattoidea based on the decisive amino-  
765 acid alignment (585,040 amino-acid sites, 592 partitions, number of quartets: 45,360, see Table  
766 S6). T2 (indicated by a \$) was supported in our best ML tree. Cory: Corydioidea (group 1); Blab:  
767 Blaberoidea (group 2); Blatt: Blattoidea (group 3), nonBP: non-blattodean Polyneoptera used as  
768 outgroup taxa. **E)** non-permuted, original data, **F)** permutation I, **G)** permutation II, **H)**  
769 permutation III.  
770

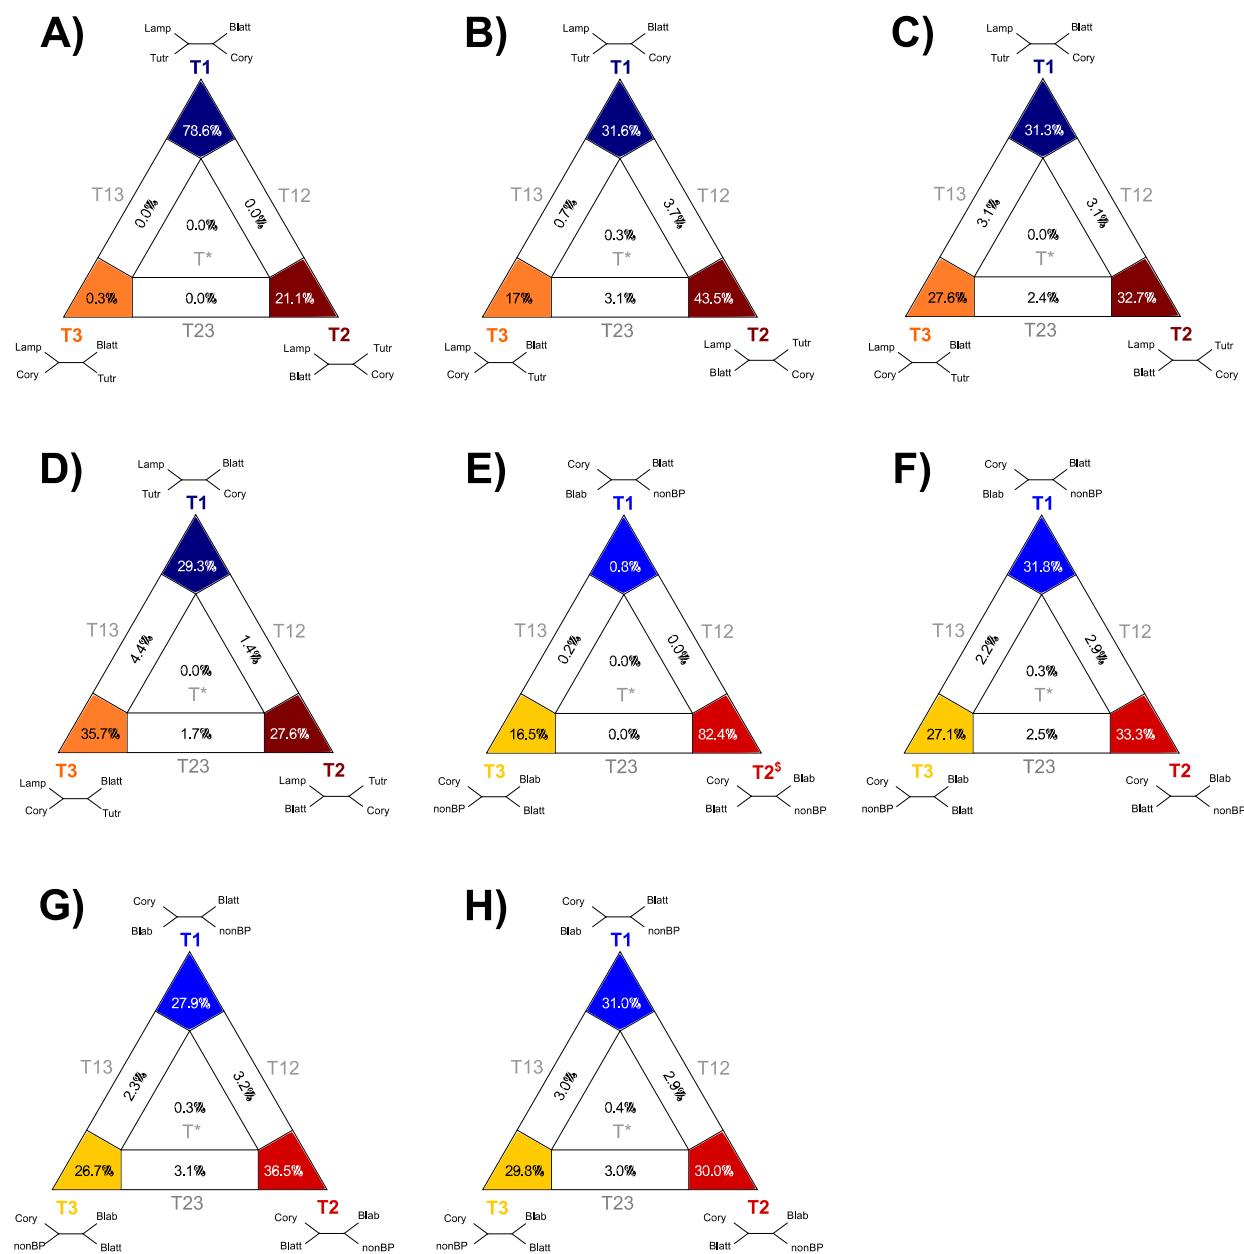

771  
 772  
 773  
 774  
 775  
 776  
 777  
 778  
 779

780 **Figure S5**

781 **Fossil calibrations used for estimating divergence dates of Blattodea.** Numbered circles  
 782 represent fossils used for calibration and their approximate placement on the phylogenetic tree.  
 783 Ranges (coloured boxes connected by dashed arrows) include minimum and maximum ages for  
 784 fossils with the corresponding colour. Dashed black lines correspond to the two maximum age  
 785 boundaries utilized. Note that the calibration ages used here are implemented in the main  
 786 analysis and are not the ages referred to as “alternate minimum calibration ages” in peripheral  
 787 analyses. Further details are given in Table S8.  
 788

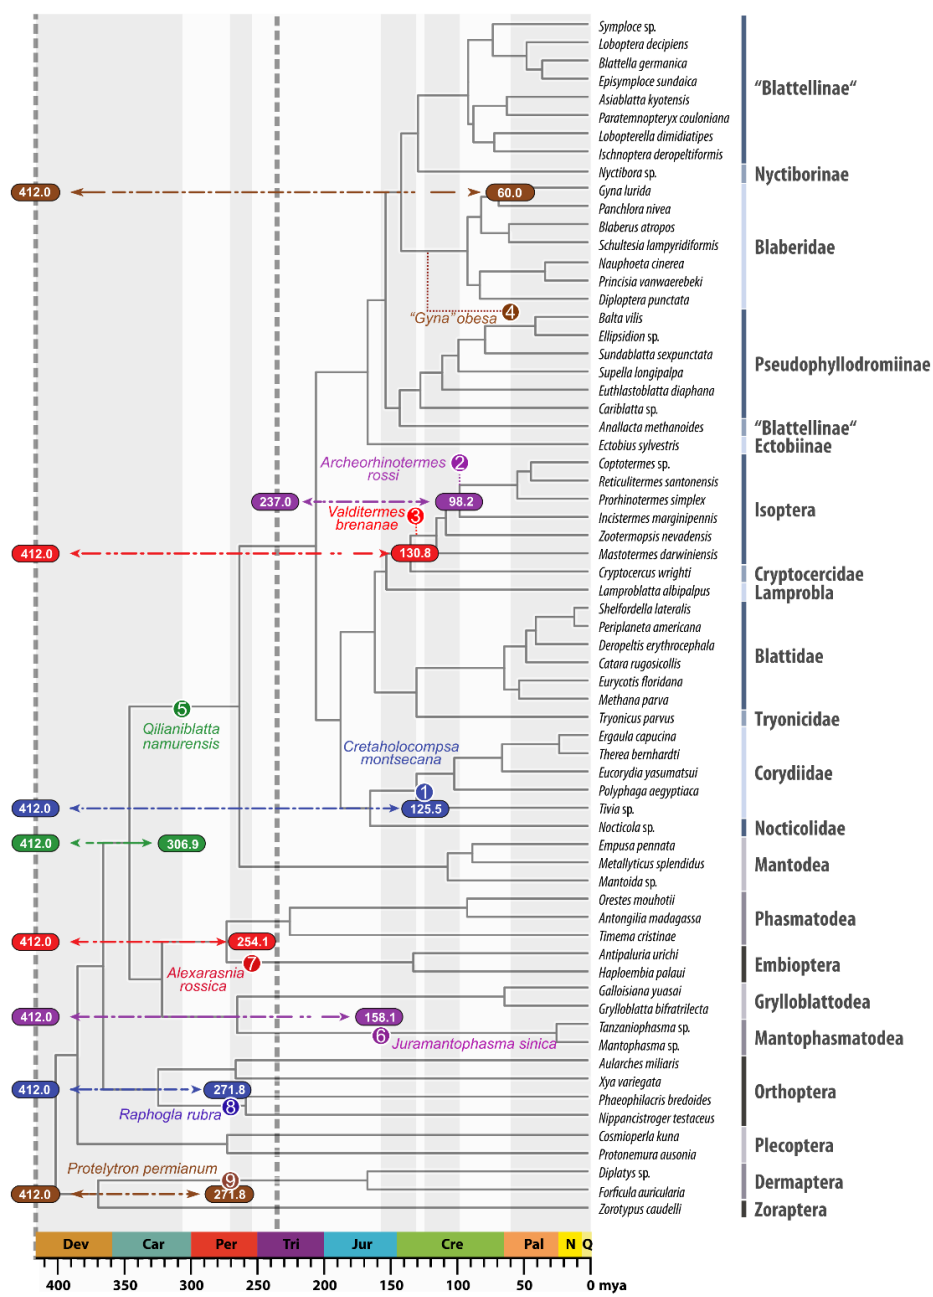

789

790

791 **Figure S6**  
 792 **Distributions of ages for the nine calibrated nodes of the reduced dataset used for**  
 793 **divergence date estimates.** Names above the plots indicate the fossil used for calibration of the  
 794 respective node. Dashed lines represent the bounds of uniform prior distribution. Red lines show  
 795 the effective prior distribution of ages; solid black lines show the posterior distribution of ages  
 796 (reduced decisive amino-acid dataset).  
 797

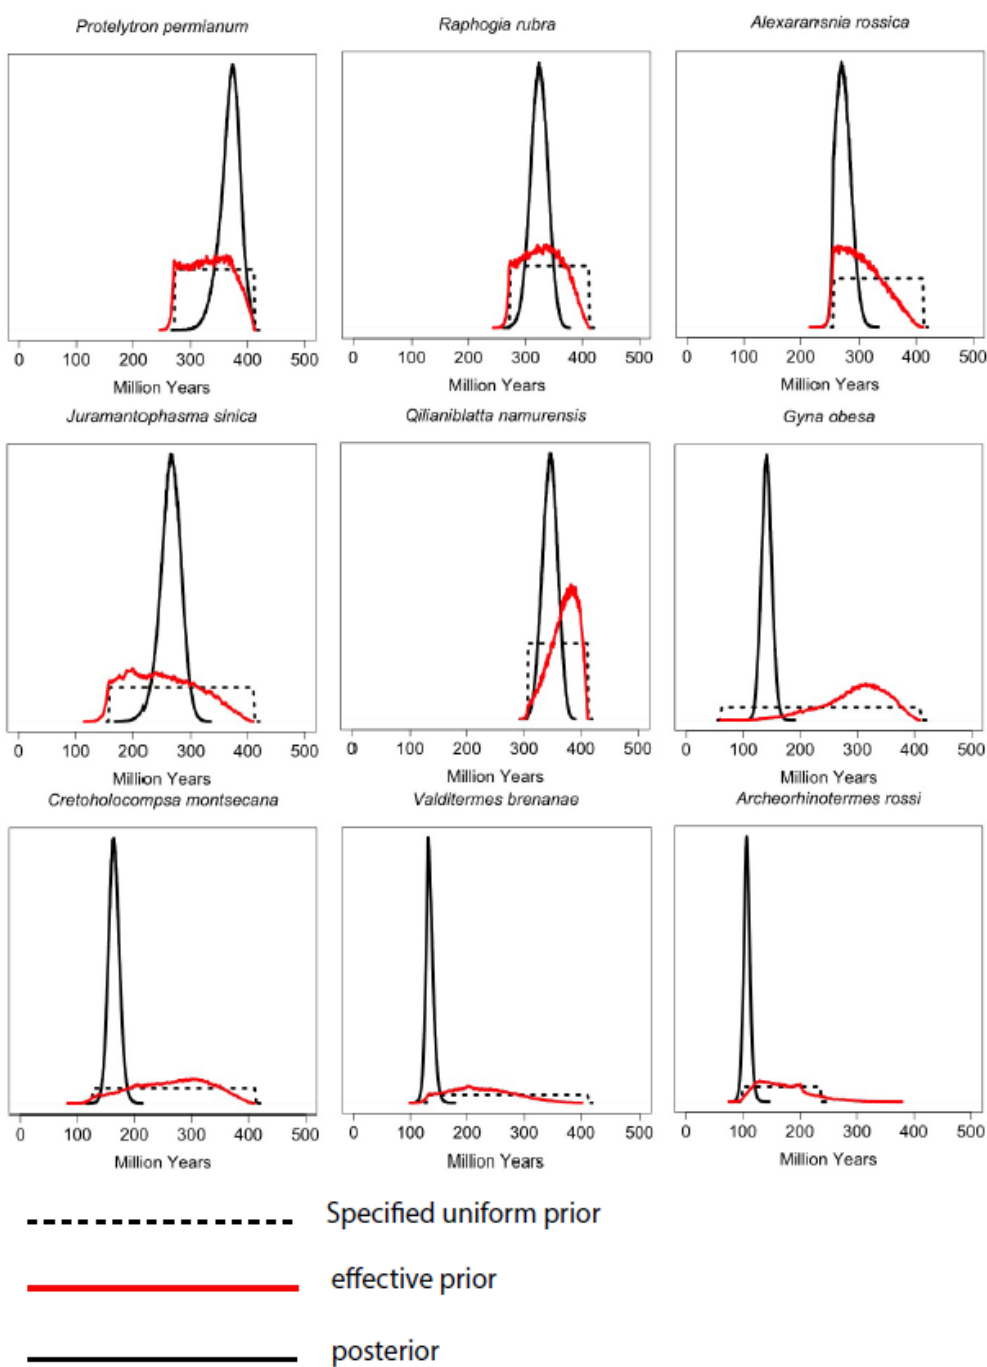

799 **Figure S7**

800 **Pairwise comparison of posterior mean node age estimates and upper and lower confidence**  
801 **intervals (CI) of four independent runs of the reduced decisive amino-acid dataset (66 taxa,**  
802 **71,126 aa sites; coverage: at least 95% of included species, see methods section). Runs were**  
803 **performed with the independent-rates clock model and identical settings expect for the seed.**  
804 **Black dots: posterior mean ages; +: lower 95% equal-tail CI; triangles: 95% upper equal-tail CI.**  
805

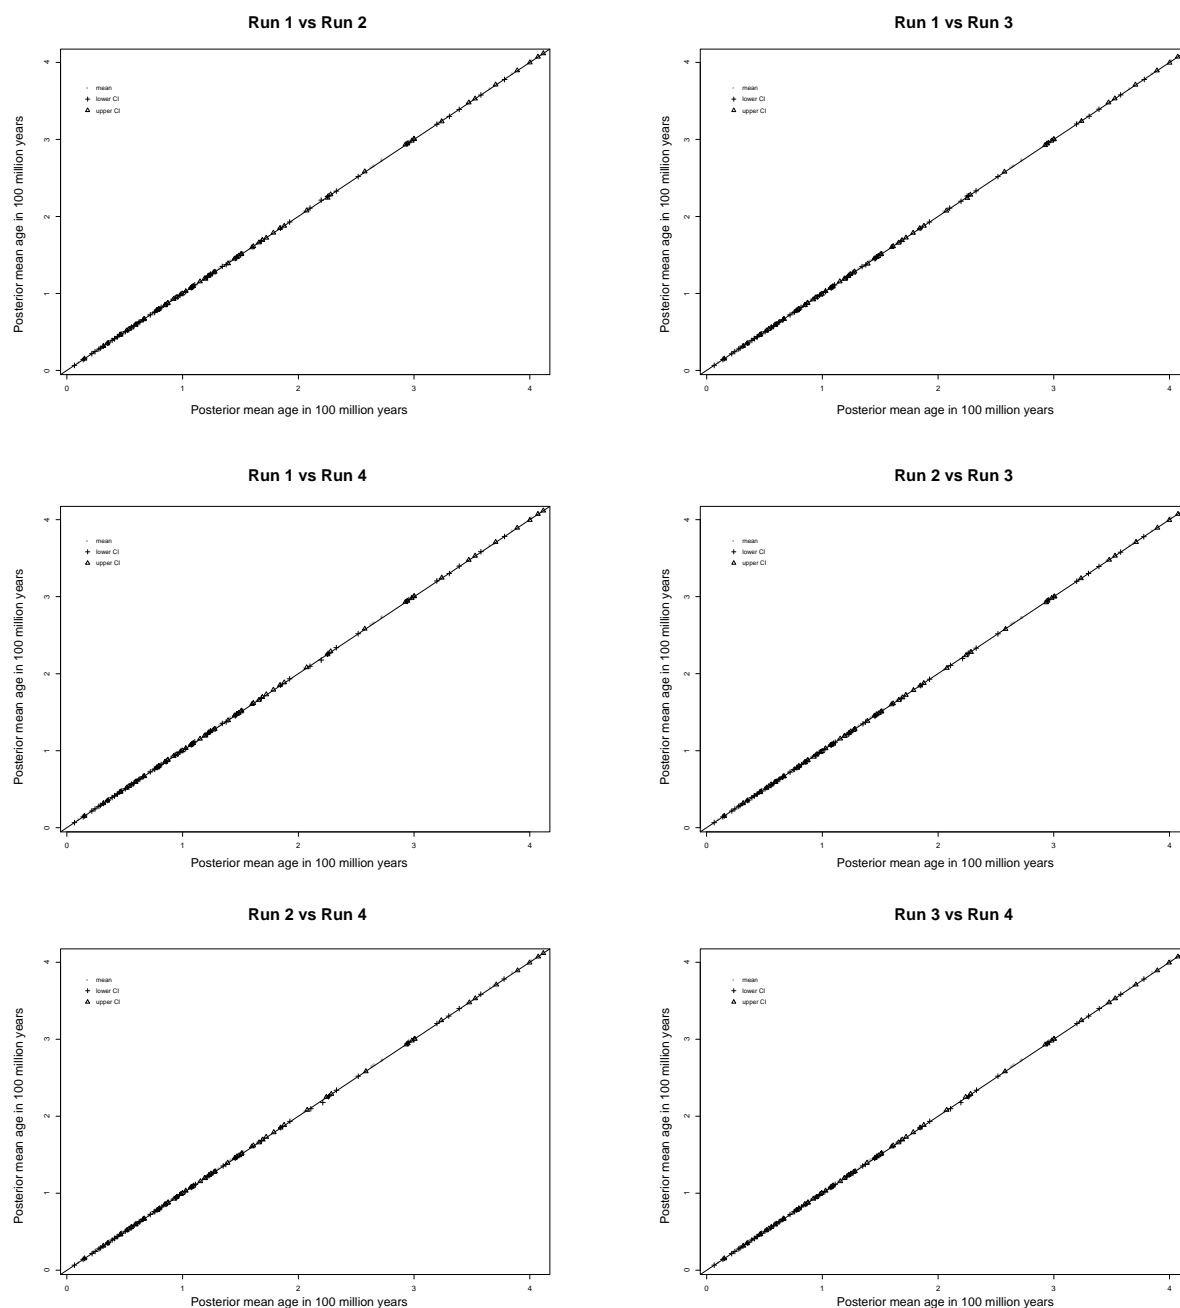

807 **Figure S8**

808 **Pairwise comparison of posterior mean node age estimates and upper and lower confidence**  
809 **intervals (CI) of four independent runs of the unreduced decisive amino-acid dataset (66**  
810 **taxa, 580,040 aa sites). Runs were performed with the independent-rates clock model and**  
811 **identical settings expect for the seed. Black dots: posterior mean ages; +: lower 95% equal-tail**  
812 **CI; triangles: 95% upper equal-tail CI.**  
813

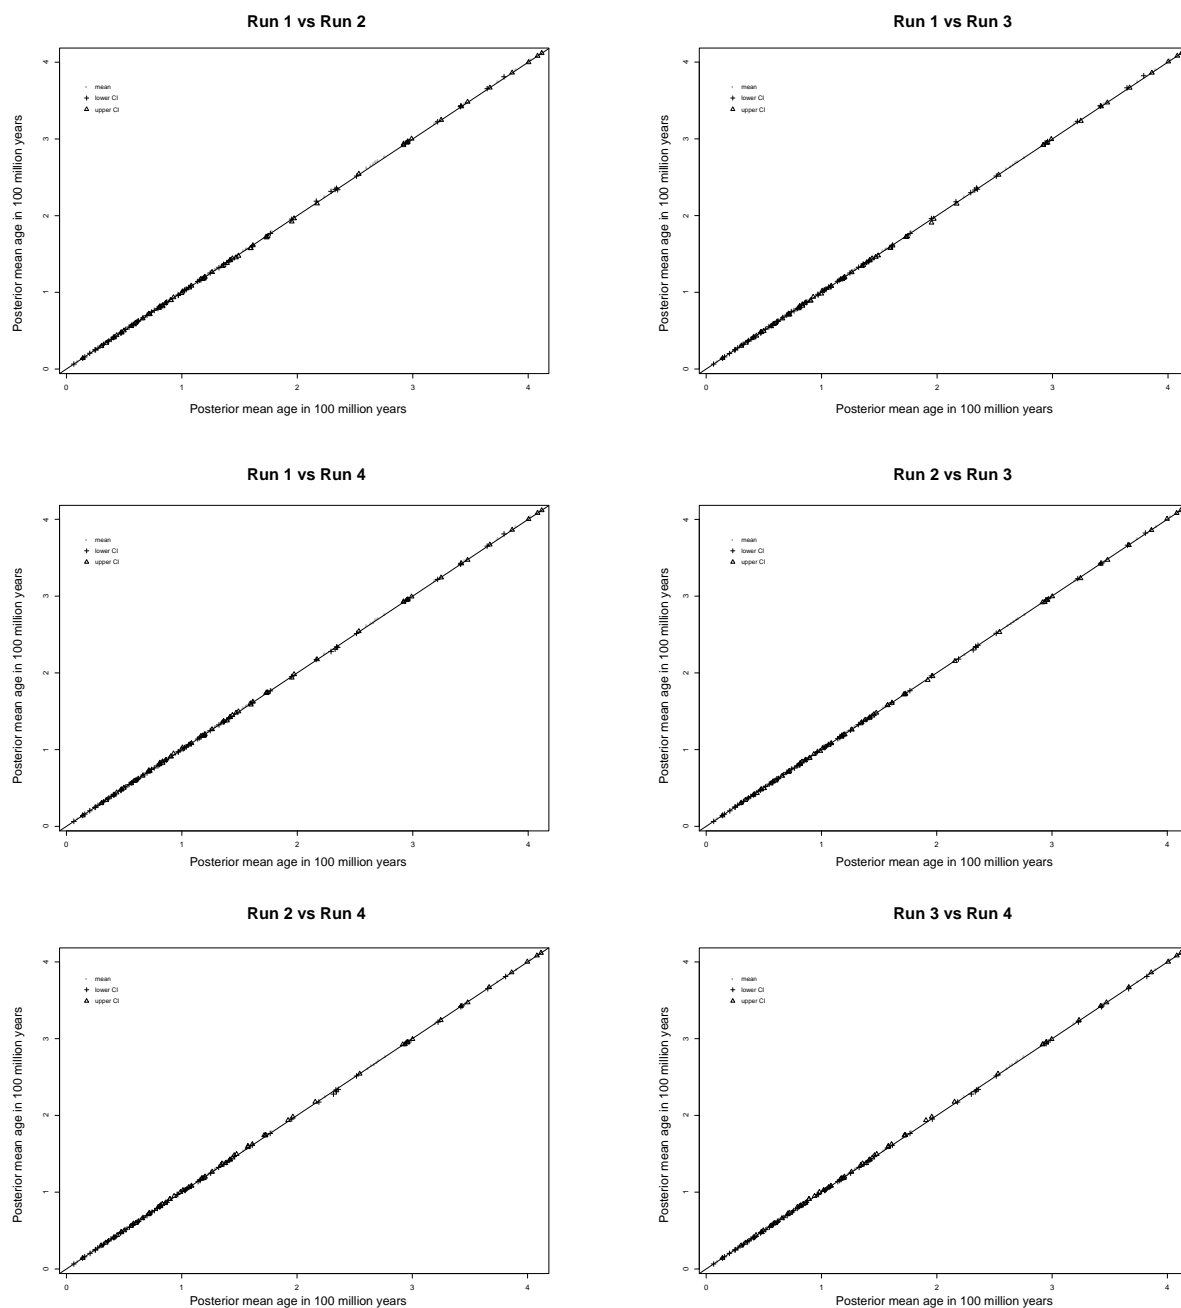

815 **References**

- 816 Aberer, A.J., Krompass, D., & Stamatakis, A. (2013) Pruning Rogue Taxa Improves  
817 Phylogenetic Accuracy: An Efficient Algorithm and Webservice. *Systematic Biology*, **62**, 162-  
818 166.
- 819 Bourguignon, T., Lo, N., Cameron, S.L., Sobotnik, J., Hayashi, Y., Shigenobu, S., Watanabe, D.,  
820 Roisin, Y., Miura, T., & Evans, T.A. (2015) The evolutionary history of termites as inferred from  
821 66 mitochondrial genomes. *Mol Biol Evol*, **32**, 406-21.
- 822 Bourguignon, T., Tang, Q., Ho, S.Y.W., Juna, F., Wang, Z., Arab, D.A., Cameron, S.L., Walker,  
823 J., Rentz, D., Evans, T.A., & Lo, N. (2018) Transoceanic dispersal and plate tectonics shaped  
824 global cockroach distributions: Evidence from mitochondrial phylogenomics. *Molecular Biology*  
825 *and Evolution*, **35**, 1-14.
- 826 Bowker, A.H. (1948) A Test for Symmetry in Contingency Tables. *Journal of the American*  
827 *Statistical Association*, **43**, 572-574.
- 828 Camacho, C., Coulouris, G., Avagyan, V., Ma, N., Papadopoulos, J., Bealer, K., & Madden, T.L.  
829 (2009) BLAST+: architecture and applications. *BMC bioinformatics*, **10**, 421.
- 830 Chernomor, O., von Haeseler, A., & Minh, B.Q. (2016) Terrace Aware Data Structure for  
831 Phylogenomic Inference from Supermatrices. *Syst Biol*, **65**, 997-1008.
- 832 Clark, J.R. & Kambhampati, S. (2003) Phylogenetic analysis of *Blattabacterium*, endosymbiotic  
833 bacteria from the wood roach, *Cryptocercus* (Blattodea: Cryptocercidae), including a description  
834 of three new species. *Molecular Phylogenetics and Evolution*, **26**, 82-88.
- 835 Clark, J.W., Hossain, S., Burnside, C.A., & Kambhampati, S. (2001) Coevolution between a  
836 cockroach and its bacterial endosymbiont: a biogeographical perspective. *Proceedings of the*  
837 *Royal Society of London. Series B: Biological Sciences*, **268**, 393-8.
- 838 Dell'Ampio, E., Meusemann, K., Szucsich, N.U., Peters, R.S., Meyer, B., Borner, J., Petersen,  
839 M., Aberer, A.J., Stamatakis, A., Walz, M.G., Minh, B.Q., von Haeseler, A., Ebersberger, I.,  
840 Pass, G., & Misof, B. (2014) Decisive datasets in phylogenomics: lessons from studies on the  
841 phylogenetic relationships of primarily wingless insects. *Mol Biol Evol*, **31**, 239-49.
- 842 Djernæs, M., Klass, K.-D., Picker, M.D., & Damgaard, J. (2012) Phylogeny of cockroaches  
843 (Insecta, Dictyoptera, Blattodea), with placement of aberrant taxa and exploration of out-group  
844 sampling. *Systematic Entomology*, **37**, 65-83.
- 845 Djernæs, M., Klass, K.D., & Eggleton, P. (2015) Identifying possible sister groups of  
846 Cryptocercidae+Isoptera: A combined molecular and morphological phylogeny of Dictyoptera.  
847 *Molecular Phylogenetics and Evolution*, **84**, 284-303.
- 848 dos Reis, M., Alvarez-Carretero, S., & Yang, Z. (2017) MCMCTree Tutorials.
- 849 Dudley, R. & Yanoviak, S.P. (2011) Animal aloft: The origins of aerial behavior and flight.  
850 *Integrative and Comparative Biology*, **51**, 926-36.

- 851 Eddy, S.R. (2011) Accelerated Profile HMM Searches. *PLoS Comput Biol*, **7**, e1002195.
- 852 Evangelista, D.A., Djernæs, M., & Kohli, M.K. (2017) Fossil calibrations for the cockroach  
853 phylogeny (Insecta, Dictyoptera, Blattodea), comments on the use of wings for their  
854 identification, and a redescription of the oldest Blaberidae. *Palaeontologia Electronica*, **20.3**, 1-  
855 23.
- 856 Grandcolas, P. (1996) The phylogeny of cockroach families: A cladistic appraisal of morpho-  
857 anatomical data. *Canadian Journal of Zoology*, **74**, 508-527.
- 858 Grandcolas, P. (1997) The monophyly of the subfamily Perisphaeriinae (Dictyoptera: Blattaria:  
859 Blaberidae). *Systematic Entomology*, **22**, 123-130.
- 860 Grandcolas, P. (1998) The Evolutionary Interplay of Social Behavior, Resource Use and Anti-  
861 Predator Behavior in Zetoborinae+Blaberinae+Gyninae+Diplopterinae Cockroaches: A  
862 Phylogenetic Analysis. *Cladistics*, **14**, 117–127.
- 863 Grandcolas, P. (1999) Reconstructing the past of *Cryptocercus* (Blattaria: Polyphagidae):  
864 Phylogenetic histories and stories. *Annals of the Entomological Society of America*, **92**, 303-307.
- 865 Grimaldi, D.A. & Engel, M. (2005) Evolution of the Insects.
- 866 Gu, X., Fu, Y., & Li, W. (1995) Maximum likelihood estimation of the heterogeneity of  
867 substitution rate among nucleotide sites. *Molecular Biology and Evolution*, **12**, 546–557.
- 868 Guthrie, D.M. & Tindall, A.R. (1968) The biology of the cockroach Edward Arnold Publishers  
869 Ltd., Great Britain.
- 870 Ho, S.Y. & Jermin, L. (2004a) Tracing the decay of the historical signal in biological sequence  
871 data. *Systematic Biology*, **53**, 623-637.
- 872 Ho, S.Y. & Jermin, L. (2004b) Tracing the decay of the historical signal in biological sequence  
873 data. *Syst Biol*, **53**, 623-37.
- 874 Inward, D., Beccaloni, G., & Eggleton, P. (2007) Death of an order: A comprehensive molecular  
875 phylogenetic study confirms that termites are eusocial cockroaches. *Biology Letters*, **3**, 331-5.
- 876 Jermin, L.S., Ho, S.Y.W., Ababneh, F., Robinson, J., & Larkum, A.W.D. (2004) The Biasing  
877 Effect of Compositional Heterogeneity on Phylogenetic Estimates May be Underestimated.  
878 *Systematic Biology*, **53**, 638–643.
- 879 Kalyaanamoorthy, S., Minh, B.Q., Wong, T.K., Haeseler, A.v., & Jermin, a.L.S. (2017)  
880 ModelFinder: Fast model selection for accurate phylogenetic estimates. *Nature Methods*, **14**,  
881 587-589.
- 882 Katoh, K. & Standley, D.M. (2013) MAFFT Multiple Sequence Alignment Software Version 7:  
883 Improvements in Performance and Usability. *Molecular Biology and Evolution*, **30**, 772-780.



- 884 Kinjo, Y., Bourguignon, T., Tong, K.J., Kuwahara, H., Lim, S.J., Yoon, K.B., Shigenobu, S.,  
885 Park, Y.C., Nalepa, C.A., Hongoh, Y., Ohkuma, M., Lo, N., & Tokuda, G. (2018) Parallel and  
886 gradual genome erosion in the Blattabacterium endosymbionts of *Mastotermes darwiniensis* and  
887 *Cryptocercus* wood roaches. *Genome Biol Evol.*
- 888 Klass, K.-D. & Meier, R. (2006) A phylogenetic analysis of Dictyoptera (Insecta) based on  
889 morphological characters. *Entomologische Abhandlungen*, **63**, 3-50.
- 890 Kosiol, C. & Goldman, N. (2005) Different versions of the Dayhoff rate matrix. *Mol Biol Evol*,  
891 **22**, 193-9.
- 892 Kriventseva, E.V., Tegenfeldt, F., Petty, T.J., Waterhouse, R.M., Simao, F.A., Pozdnyakov, I.A.,  
893 Ioannidis, P., & Zdobnov, E.M. (2015) OrthoDB v8: update of the hierarchical catalog of  
894 orthologs and the underlying free software. *Nucleic Acids Res*, **43**, D250-6.
- 895 Kuck, P., Meusemann, K., Dambach, J., Thormann, B., von Reumont, B.M., Wägele, J.W., &  
896 Misof, B. (2010) Parametric and non-parametric masking of randomness in sequence alignments  
897 can be improved and leads to better resolved trees. *Front Zool*, **7**, 10.
- 898 Lanfear, R., Calcott, B., Kainer, D., Mayer, C., & Stamatakis, A. (2014) Selecting optimal  
899 partitioning schemes for phylogenomic datasets. *BMC Evolutionary Biology*, **14**.
- 900 Lanfear, R., Frandsen, P.B., Wright, A.M., Senfeld, T., & Calcott, B. (2016) PartitionFinder 2:  
901 new methods for selecting partitioned models of evolution for molecular and morphological  
902 phylogenetic analyses. *Molecular biology and evolution*, **34**, 772–773.
- 903 Le, S.Q. & Gascuel, O. (2008) An improved general amino acid replacement matrix. *Mol Biol*  
904 *Evol*, **25**, 1307-20.
- 905 Legendre, F. & Condamine, F.L. (2018) When Darwin's special difficulty promotes  
906 diversification in insects. *Systematic Biology*, **xx**.
- 907 Legendre, F., Grandcolas, P., & Thouzé, F. (2017) Molecular phylogeny of Blaberidae  
908 (Dictyoptera, Blattodea) with implications for taxonomy and evolutionary studies. *European*  
909 *Journal of Taxonomy*, **291**, 1-13.
- 910 Legendre, F., Nel, A., Svenson, G.J., Robillard, T., Pellens, R., & Grandcolas, P. (2015)  
911 Phylogeny of Dictyoptera: Dating the origin of cockroaches, praying mantises and termites with  
912 molecular data and controlled fossil evidence. *PLoS One*, **10**, e0130127.
- 913 Lo, N., Bandi, C., Watanabe, H., Nalepa, C., & Beninati, T. (2003) Evidence for cocladogenesis  
914 between diverse Dictyopteran lineages and their intracellular endosymbionts. *Molecular Biology*  
915 *and Evolution*, **20**, 907-913.
- 916 Maddison, W.P. & Maddison, D.R. (2017) *Mesquite: A modular system for evolutionary*  
917 *analysis*, Version 3.31.

- 918 Maekawa, K., Lo, N., Kitade, O., Miura, T., & Matsumoto, T. (1999) Molecular phylogeny and  
919 geographic distribution of wood-feeding cockroaches in east asian islands. *Molecular*  
920 *Phylogenetics and Evolution*, **13**, 360–376.
- 921 Mark, D.F., Rice, C.M., & Trewin, N.H. (2013) Discussion on ‘A high-precision U–Pb age  
922 constraint on the Rhynie Chert Konservat-Lagerstätte: Time scale and other implications’.  
923 *Journal of the Geological Society*, **170**, 701–703.
- 924 McKittrick, F.A. (1964) Evolutionary studies of cockroaches. *Cornell Experiment Station*  
925 *Memoir*, **389**, 1–134.
- 926 Mesquita, R.D., Vionette-Amaral, R.J., Lowenbergerd, C., Rivera-Pomar, R., Monteiro, F.A.,  
927 Patrick Minxh, J.S., Carvalho, A.B., Panzera, F., Lawson, D., Torres, A.Q., Ribeiro, J.M.C.,  
928 Sorgine, M.H.F., Waterhouse, R.M., Montague, M.J., Abad-Franch, F., Alves-Bezerra, M.,  
929 Amaral, L.R., Araujo, H.M., Araujo, R.N., Aravind, L., Atella, G.C., Azambuja, P., Berni, M.,  
930 Bittencourt-Cunha, P.R., Braz, G.R.C., Calderón-Fernández, G., Carareto, C.M.A., Christensen,  
931 M.B., Costa, I.R., Costa, S.G., Dansa, M., Dumas-Filho, C.R.O., De-Paula, I.F., Dias, F.A.,  
932 Dimopoulos, G., Emrich, S.J., Fampa, N.E.-B.P., Fernandez-Medina, R.D., Fonseca, R.N.d.,  
933 Fontenele, M., Fronick, C., Fulton, L.A., Gandara, A.C., Garcia, E.S., Genta, F.A., Giraldo-  
934 Calderón, G.I., Gomes, B., Gondim, K.C., Granzotto, A., Guarneri, A.A., Guigó, R., Harry, M.,  
935 Hughes, D.S.T., Jablonka, W., Jacquín-Joly, E., Juárez, M.P., Koerich, L.B., Lange, A.B.,  
936 Latorre-Estivalis, J.M., Lavor, A., Lawrence, G.G., Lazoski, C., Lazzari, C.R., Lopes, R.R.,  
937 Lorenzo, M.G., Lugon, M.D., Majerowicz, D., Marcet, P.L., Mariotti, M., Masuda, H., Megy,  
938 K., Melo, A.C.A., Missirlis, F., Mota, T., Noriega, F.G., Nouzova, M., Nunes, R.D., Oliveira,  
939 R.L.L., Oliveira-Silveira, G., Ons, S., Orchard, I., Pagola, L., Paiva-Silva, G.O., Pascual, A.,  
940 Pavan, M.G., Pedrini, N., Peixoto, A.A., Pereira, M.H., Pike, A., Polycarpo, C., Prosdocimi, F.,  
941 Ribeiro-Rodrigues, R., Robertson, H.M., Salerno, A.P., Salmon, D., Santesmasses, D., Schama,  
942 R., Seabra-Junior, E.S., Silva-Cardoso, L., Silva-Neto, M.A.C., et al. (2016) Genome of  
943 *Rhodnius prolixus*, an insect vector of Chagas disease, reveals unique adaptations to  
944 hematophagy and parasite infection. *Proc Natl Acad Sci USA*, **112**, 14936–14941.
- 945 Milburn, N.S. (1966) Fine structure of the pleomorphic in the mycetocytes and ovaries of several  
946 genera of cockroaches. *Journal of Insect Physiology*, **12**, 1245–1254.
- 947 Misof, B., Liu, S., Meusemann, K., Peters, R.S., Donath, A., Mayer, C., Frandsen, P.B., Ware, J.,  
948 Flouri, T., Beutel, R.G., Niehuis, O., Petersen, M., Izquierdo-Carrasco, F., Wappler, T., Rust, J.,  
949 Aberer, A.J., Aspöck, U., Aspöck, H., Bartel, D., Blanke, A., Berger, S., Böhm, A., Buckley,  
950 T.R., Calcott, B., Chen, J., Friedrich, F., Fukui, M., Fujita, M., Greve, C., Grobe, P., Gu, S.,  
951 Huang, Y., Jermiin, L.S., Kawahara, A.Y., Krogmann, L., Kubiak, M., Lanfear, R., Letsch, H.,  
952 Li, Y., Li, Z., Li, J., Lu, H., Machida, R., Mashimo, Y., Kapli, P., McKenna, D.D., Meng, G.,  
953 Nakagaki, Y., Navarrete-Heredia, J.L., Ott, M., Ou, Y., Pass, G., Podsiadlowski, L., Pohl, H.,  
954 von Reumont, B.M., Schütte, K., Sekiya, K., Shimizu, S., Slipinski, A., Stamatakis, A., Song,  
955 W., Su, X., Szucsich, N.U., Tan, M., Tan, X., Tang, M., Tang, J., Timelthaler, G., Tomizuka, S.,  
956 Trautwein, M., Tong, X., Uchifune, T., Walz, M.G., Wiegmann, B.M., Wilbrandt, J., Wipfler,  
957 B., Wong, T.K., Wu, Q., Wu, G., Xie, Y., Yang, S., Yang, Q., Yeates, D.K., Yoshizawa, K.,  
958 Zhang, Q., Zhang, R., Zhang, W., Zhang, Y., Zhao, J., Zhou, C., Zhou, L., Ziesmann, T., Zou, S.,

- 959 Li, Y., Xu, X., Zhang, Y., Yang, H., Wang, J., Wang, J., Kjer, K.M., et al. (2014) Phylogenomics  
960 resolves the timing and pattern of insect evolution. *Science*, **346**, 763-767.
- 961 Misof, B., Meyer, B., Reumont, B.M.v., Kück, P., Misof, K., & Meusemann, K. (2013) Selecting  
962 informative subsets of sparse supermatrices increases the chance to find correct trees. *BMC*  
963 *Bioinformatics*, **14**, 1-13.
- 964 Misof, B. & Misof, K. (2009) Article Navigation A Monte Carlo Approach Successfully  
965 Identifies Randomness in Multiple Sequence Alignments : A More Objective Means of Data  
966 Exclusion. *Systematic Biology*, **58**, 21-34.
- 967 Müller, T. & Vingron, M. (2004) Modeling Amino Acid Replacement. *Journal of Computational*  
968 *Biology*, **7**, 761-776.
- 969 Mullins, D.E. (2015) Physiology of environmental adaptations and resource acquisition in  
970 cockroaches. *Annual Review of Entomology*, **60**, 473-92.
- 971 Mullins, D.E. & Cochran, D.G. (1976) A comparative study of nitrogen excretion in twenty-  
972 three cockroach species. *Comp. Biochem. Physiol.*, **53A**, 393-399.
- 973 Mullins, D.E., Keil, C.B., & White, R.H. (1992) Maternal and paternal nitrogen investment in  
974 *Blattella germanica* (L.) (Dictyoptera; Blattellidae). *Journal of Experimental Biology*, **162**, 55-  
975 72.
- 976 Nascimento, F.F., Reis, M.D., & Yang, Z. (2017) A biologist's guide to Bayesian phylogenetic  
977 analysis. *Nat Ecol Evol*, **1**, 1446-1454.
- 978 Nguyen, L.T., Schmidt, H.A., von Haeseler, A., & Minh, B.Q. (2015) IQ-TREE: a fast and  
979 effective stochastic algorithm for estimating maximum-likelihood phylogenies. *Mol Biol Evol*,  
980 **32**, 268-74.
- 981 Patino-Navarrete, R., Moya, A., Latorre, A., & Pereto, J. (2013) Comparative genomics of  
982 *Blattabacterium cuenoti*: The frozen legacy of an ancient endosymbiont genome. *Genome*  
983 *Biology & Evolution*, **5**, 351-61.
- 984 Pattengale, N., Alipour, M., Bininda-Emonds, O., Moret, B., & Stamatakis, A. (2010) How many  
985 bootstrap replicates are necessary? *J Comput Biol*, **17**, 337-354.
- 986 Pauli, T., Burt, T.O., Meusemann, K., Bayless, K., Donath, A., Podsiadlowski, L., Mayer, C.,  
987 Kozlov, A., Vasilikopoulos, A., Liu, S., Zhou, X., Yeates, D., Misof, B., Peters, R.S., &  
988 Mengual, X. (2018) New data, same story: phylogenomics does not support Syrphoidea (Diptera:  
989 Syrphidae, Pipunculidae). *Systematics Entomology*, **43**, 447-459.
- 990 Peters, R.S., Krogmann, L., Mayer, C., Donath, A., Gunkel, S., Meusemann, K., Kozlov, A.,  
991 Podsiadlowski, L., Petersen, M., Lanfear, R., Diez, P.A., Heraty, J., Kjer, K.M., Klopstein, S.,  
992 Meier, R., Polidori, C., Schmitt, T., Liu, S., Zhou, X., Wappler, T., Rust, J., Misof, B., &  
993 Niehuis, O. (2017) Evolutionary history of the Hymenoptera. *Current Biology*, **27**, 1013-1018.

- 994 Petersen, M., Meusemann, K., Donath, A., Dowling, D., Liu, S., Peters, R.S., Podsiadlowski, L.,  
995 Vasilikopoulos, A., Zhou, X., Misof, B., & Niehuis, O. (2017) Orthograph: a versatile tool for  
996 mapping coding nucleotide sequences to clusters of orthologous genes. *BMC bioinformatics*, **18**,  
997 111.
- 998 Princis, K. (1963). Blattariae: Revision der Sudafrikanischen Blattarienfauna. In South African  
999 Animal Life (ed. by B.H.-P. Brinck & G. Rudebeck), Vol. 9. Swedish Natural Science Research  
1000 Council, Stockholm.
- 1001 Princis, K. (1969) Blattariae: Subordo Epilamproidea: Fam. Blattellidae W. Junk, s'-Gravenhage.
- 1002 Punta, M., Coggill, P.C., Eberhardt, R.Y., Mistry, J., Tate, J., Boursnell, C., Pang, N., Forslund,  
1003 K., Ceric, G., Clements, J., Heger, A., Holm, L., Sonnhammer, E.L., Eddy, S.R., Bateman, A., &  
1004 Finn, R.D. (2012) The Pfam protein families database. *Nucleic Acids Res*, **40**, D290-301.
- 1005 Rambaut, A., Drummond, A.J., Xie, D., Baele, G., & Suchard, M.A. (2018) *Tracer v1.7*.
- 1006 Sabree, Z.L., Kambhampati, S., & Moran, N.A. (2009) Nitrogen recycling and nutritional  
1007 provisioning by *Blattabacterium*, the cockroach endosymbiont. *Proceedings of the National*  
1008 *Academy of Sciences*, **106**, 19521–19526.
- 1009 Sann, M., Niehuis, O., Peters, R.S., Mayer, C., Kozlov, A., Podsiadlowski, L., Bank, S.,  
1010 Meusemann, K., Misof, B., Bleidorn, C., & Ohl, M. (2018) Phylogenomic analysis of Apoidea  
1011 sheds new light on the sister group of bees. *BMC Evol Biol*, **18**, 71.
- 1012 Schachat, S.R., Labandeira, C.C., Saltzman, M.R., Cramer, B.D., Payne, J.L., & Boyce, C.K.  
1013 (2018) Phanerozoic pO<sub>2</sub> and the early evolution of terrestrial animals. *Proc Biol Sci*, **285**.
- 1014 Schal, C. & Bell, W.J. (1982) Ecological Correlates of Paternal Investment of Urates in a  
1015 Tropical Cockroach. *Science*, **218**, 170-172.
- 1016 Schwarz, G.E. (1978) Estimating the dimension of a model. *Annals of Statistics*, **6**, 461-464.
- 1017 Shelford, R. (1908) Orthoptera: Fam. Blattidae: Subfam. Phyllodromiinae. *Genera Insectorum*,  
1018 **73**, 1-29.
- 1019 Shimodaira, H. (2002) An approximately unbiased test of phylogenetic tree selection. *Syst Biol*,  
1020 **51**, 492-508.
- 1021 Simon, S., Blanke, A., & Meusemann, K. (2018) Reanalyzing the Palaeoptera problem - The  
1022 origin of insect flight remains obscure. *Arthropod Struct Dev*, **47**, 328-338.
- 1023 Soubrier, J., Steel, M., Lee, M.S., Der Sarkissian, C., Guindon, S., Ho, S.Y., & Cooper, A.  
1024 (2012) The influence of rate heterogeneity among sites on the time dependence of molecular  
1025 rates. *Mol Biol Evol*, **29**, 3345-58.
- 1026 Stamatakis, A. (2014) RAxML version 8: a tool for phylogenetic analysis and post-analysis of  
1027 large phylogenies. *Bioinformatics*, **30**, 1312-3.

- 1028 Strimmer, K. & Haeseler, A.v. (1997) Likelihood-mapping: A simple method to visualize  
1029 phylogenetic content of a sequence alignment. *Proc. Natl. Acad. Sci. U.S.A.*, **94**, 6815–6819.
- 1030 Suyama, M., Torrents, D., & Bork, P. (2006) PAL2NAL: robust conversion of protein sequence  
1031 alignments into the corresponding codon alignments. *Nucleic Acids Research*, **34**, 609-612.
- 1032 Terrapon, N., Li, C., Robertson, H.M., Ji, L., Meng, X., Booth, W., Chen, Z., Childers, C.P.,  
1033 Glastad, K.M., Gokhale, K., Gowin, J., Gronenberg, W., Hermansen, R.A., Hu, H., Hunt, B.G.,  
1034 Huylmans, A.K., Khalil, S.M., Mitchell, R.D., Munoz-Torres, M.C., Mustard, J.A., Pan, H.,  
1035 Reese, J.T., Scharf, M.E., Sun, F., Vogel, H., Xiao, J., Yang, W., Yang, Z., Yang, Z., Zhou, J.,  
1036 Zhu, J., Brent, C.S., Elsik, C.G., Goodisman, M.A., Liberles, D.A., Roe, R.M., Vargo, E.L.,  
1037 Vilcinskas, A., Wang, J., Bornberg-Bauer, E., Korb, J., Zhang, G., & Liebig, J. (2014) Molecular  
1038 traces of alternative social organization in a termite genome. *Nat Commun*, **5**, 3636.
- 1039 The\_Uniprot\_Consortium (2015) Uniprot: a hub for protein information. *Nucleic Acids*  
1040 *Research*, **43**, 204-212.
- 1041 Tokuda, G., Elbourne, L.D., Kinjo, Y., Saitoh, S., Sabree, Z., Hojo, M., Yamada, A., Hayashi,  
1042 Y., Shigenobu, S., Bandi, C., Paulsen, I.T., Watanabe, H., & Lo, N. (2013) Maintenance of  
1043 essential amino acid synthesis pathways in the *Blattabacterium cuenoti* symbiont of a wood-  
1044 feeding cockroach. *Biology Letters*, **9**, 20121153.
- 1045 Trewin, N.H. (2008). The Rhynie cherts: An early Devonian ecosystem preserved by  
1046 hydrothermal activity. In *Evolution of Hydrothermal Ecosystems on Earth (and Mars?)* (ed. by  
1047 G.R. Bock & J.A. Goode), pp. 264. John Wiley & Sons.
- 1048 Veerassamy, S., Smith, A., & Tillier, E. (2003) A transition probability model for amino acid  
1049 substitutions from blocks. *Journal of Computational Biology*, **10**, 997-1010.
- 1050 Wang, Z., Shi, Y., Qiu, Z., Che, Y., & Lo, N. (2017) Reconstructing the phylogeny of Blattodea:  
1051 Robust support for interfamilial relationships and major clades. *Scientific Reports*, **7**, 1-8.
- 1052 Warnock, R.C., Parham, J.F., Joyce, W.G., Lyson, T.R., & Donoghue, P.C. (2015) Calibration  
1053 uncertainty in molecular dating analyses: There is no substitute for the prior evaluation of time  
1054 priors. *Proceedings of the Royal Society Biology*, **282**, 20141013.
- 1055 Whelan, S. & Goldman, N. (2001) A General Empirical Model of Protein Evolution Derived  
1056 from Multiple Protein Families Using a Maximum-Likelihood Approach. *Molecular Biology and*  
1057 *Evolution*, **18**, 691–699.
- 1058 Wipfler, B., Letsch, H., Frandsen, P.B., Kapli, P., Bartel, D., Buckley, T.R., Donath, A., Edgerly,  
1059 J.S., Fujita, M., Liu, S., Machida, R., Mashimo, Y., Mayer, C., Misof, B., Niehuis, O., Peters,  
1060 R.S., Petersen, M., Podsiadlowski, L., Schütte, K., Shimizu, S., Uchifune, T., Wilbrandt, J., Yan,  
1061 E., Zhou, X., & Simon, S. (unpublished) Evolutionary history of Polyneoptera and its  
1062 implications for our understanding of the early evolution of winged insects..
- 1063 Wong, T.K., Kalyaanamoorthy, S., Meusemann, K., Yeates, D., Misof, B., & Jermini, L. (2017)  
1064 AliStat version 1.3. Commonwealth Scientific and Industrial Research Organisation (CSIRO).

- 1065 Xie, Y., Wu, G., Tang, J., Luo, R., Patterson, J., Liu, S., Huang, W., He, G., Gu, S., Li, S., Zhou,  
1066 X., Lam, T.W., Li, Y., Xu, X., Wong, G.K., & Wang, J. (2014) SOAPdenovo-Trans: de novo  
1067 transcriptome assembly with short RNA-Seq reads. *Bioinformatics*, **30**, 1660-6.
- 1068 Yang, Z. (1994) Maximum Likelihood Phylogenetic Estimation from DNA Sequences with  
1069 Variable Rates over Sites: Approximate Methods. *Journal of Molecular Evolution*, **39**, 306-314.
- 1070 Yang, Z. & Rannala, B. (2006) Bayesian estimation of species divergence times under a  
1071 molecular clock using multiple fossil calibrations with soft bounds. *Molecular Biology and*  
1072 *Evolution*, **23**, 212-226.
- 1073 Yanoviak, S.P., Kaspari, M., & Dudley, R. (2009) Gliding hexapods and the origins of insect  
1074 aerial behaviour. *Biol Lett*, **5**, 510-2.



1075

## S2 Fossil Calibrations

### 1076 S2.1 Fossils Selected as Clade Minimum Age Calibrations

1077 Fossil and other calibrations heavily inform prior date distributions, and are the  
 1078 parameters that dating analyses are the most sensitive to (Inoue et al., 2010; Zheng & Wiens,  
 1079 2015). Hence, they are of utmost importance for the dating analyses. However, the fossil record  
 1080 has not always been effectively scrutinized, and as a result many fossil calibration points have  
 1081 proven invalid. We therefore carefully vetted Blattodea and outgroup fossils based on the five  
 1082 criteria provided by Parham et al. (2012):

1083 **CR1:** single/multiple operational taxonomic units with museum numbers;

1084 **CR2:** apomorphy-based or phylogenetic analysis supporting an unambiguous placement;

1085 **CR3:** agreement of morphology and molecular data in that placement;

1086 **CR4:** detailed locality and stratigraphy data provided;

1087 **CR5:** radioisotopic age or numeric age references given and agreeing with CR4.

1088 Details relevant to the age of each fossil and their stratigraphic context is given in S2.3.  
 1089 We classify character states supporting phylogenetic placement of taxa as ultimate, contextual,  
 1090 and then class 1 or class 2. A character state in the ultimate level is one that assigns a taxon to a  
 1091 specific node (i.e. a synapomorphy for that node). In contrast, a character state in the contextual  
 1092 level is plesiomorphic to that node. A class 1 character is one that occurs only once and a class 2  
 1093 character is one that is homoplastic.

#### 1094 *Selected fossil calibrations*

1095 **Calibrating node:** stem-Corydiidae s.s. / crown-(Nocticola + Corydiidae s.s.)

1096 **Fossil item:** *Cretaholocompsa montsecana* Martínez-Delclòs, 1993

1097 **Original description:** Martínez-Delclòs, X. (1993) Blátidos (Insecta, Blattodea) del  
 1098 Cretácico Inferior de España. Familias Mesoblattinidae, Blattulidae y Poliphagidae. *Boletín*  
 1099 *Geológico y Minero*, **104**, 52–74.

1100 **Further descriptive accounts:** The position of the species is discussed in Evangelista et  
 1101 al. (2017) based on the original data, including discussion on the age of the fossil.

1102 **Locality:** Montsec (125.5 MYA).

1103 **CR1:** LC-1704-IEI (Fundació Pública Institut d'Estudis Ilerdencs, Lleida, Spain).

1104 **CR2:** See below.

1105 **CR3:** A clade comprising *Nocticola* and Corydiidae is supported by both molecular  
 1106 (Djernæs et al., 2015 ; Legendre et al., 2015; Wang et al., 2017) and morphological (Roth, 1988)  
 1107 data.

1108 **CR4:** Yes (original description and further descriptive account).

1109 **CR5:** Yes (see Section S2.3).

1110 **Phylogenetic justification & discussion:**

1111 The placement of *Cretaholocompsa montsecana* as stem-Corydiidae s.s. (hence crown-  
1112 (Nocticola + Corydiidae s.s.)) is based on the following character states:

1113 Ultimate level:

1114 Class 1: (1) in forewing, occurrence of a well-delimited lighter single colour spot,  
1115 medially located.

1116 Class 2: (2) in forewing, occurrence of a differently sclerotized band parallel to the  
1117 posterior wing margin; (3) in forewing, venation not substantiated by prominent tubular,  
1118 sclerotized structures; (4) in forewing, Radius reaching anterior wing margin basally  
1119 (Radius being branched).

1120 Contextual level:

1121 Class 1 [stem-(Tiviinae + (Polyphaginae + Corydiinae))]: (5) in forewing, basally  
1122 or medially sharply angulate CuP.

1123 Class 2: none found / considered.

1124 Concurring with Evangelista et al. (2017), we consider the placement of this species well-  
1125 founded. The species displays a mosaic of character states when compared to extant genera,  
1126 namely *Euthyrrhapha* and *Holocompsa*, both closely related to *Tivia* (itself included in our  
1127 analysis; Legendre et al., 2015). To our knowledge, the character state (1) occurs in most  
1128 *Euthyrrhapha* species and some species of *Holocompsa* [based on photos in Beccaloni (2014)  
1129 and pers. obs.]. The sharply angulate CuP, regarded by Evangelista et al. (2017) as indicative of  
1130 affinities with *Euthyrrhapha* and *Holocompsa*, actually also occurs in *Polyphaga* (Béthoux et al.,  
1131 2009; and pers. obs.). Therefore, it is herein relegated to the contextual level. In conjunction with  
1132 character state (1) it ascertains the placement of the fossil.

1133 Further character states support the affinities of *Cretaholocompsa montsecana* with  
1134 Tiviinae, Holocompsinae and Euthyrrhaphinae. The character state (2) occurs only in  
1135 *Euthyrrhapha* [based on photos in Beccaloni (2014) and pers. obs. Olivier Béthoux]. It must be  
1136 acknowledged, however, that it also occurs in the fossil family Ponopterixidae ('adsutural line'  
1137 in Nel et al. 2014; Lee, 2016), whose affinities are not evident. The character state (3) occurs in  
1138 both *Euthyrrhapha* and *Holocompsa*. In the former, the forewings are strongly sclerotized; as a  
1139 consequence, the venation can only be (partly) observed using transmitted light (pers. obs.). In  
1140 *Holocompsa*, the forewing distal part is comparatively weakly sclerotized, yet venation is equally  
1141 very difficult to observe. Based on the original description (depicting a very short M and  
1142 complete absence of CuA branches) we assume that character state (3) occurs in  
1143 *Cretaholocompsa montsecana*. To our knowledge, the character state (4) is unique to  
1144 *Holocompsa* (Rehn, 1951; its occurrence in *Euthyrrhapha* cannot be completely ruled out, given  
1145 the occurrence of character state (3)).

1146

1147 **Calibrating node: stem-Neoisoptera / crown-(Kalotermitidae + Neoisoptera)**

1148 **Preliminary remarks:** We scrutinized several putative crown-Isoptera. We initially  
1149 relied on the phylogenetic analysis by Engel et al. (2007), based on morphology, and the review



1150 by Ware et al. (2010), combining molecular and morphological data. Note that in fig. 1 in the  
 1151 latter several combinations of genus & species names are erroneous. Comparing these two  
 1152 analyses (both of which used the same morphological matrix for the phylogenetic reconstruction  
 1153 of fossil taxa), we saw a congruent lack of resolution in the ‘Euisoptera assemblage’ (Euisoptera  
 1154 being the sister-group to Mastotermitidae, among crown-Isoptera). Given this lack of  
 1155 phylogenetic resolution among the basal nodes of non-Neoisopteran Isoptera, we did not include  
 1156 fossil calibrations in the vicinity of the most recent common ancestor of Euisoptera.

1157 **Fossil item: *Archeorhinotermes rossi* Krishna & Grimaldi, 2013**

1158 **Original description:** Krishna, K. & Grimaldi, D.A. (2003) The first Cretaceous  
 1159 Rhinotermitidae (Isoptera): a new species, genus, and subfamily in Burmese amber. *American*  
 1160 *Museum Novitates*, **3390**, 1–10.

1161 **Further descriptive accounts:** none.

1162 **Locality:** Myanmar amber (98.2 MYA).

1163 **CR1:** In. 20160 (Natural History Museum, London, UK).

1164 **CR2:** See below.

1165 **CR3:** The Kalotermitidae-Neoisoptera sister-group relationship is well supported by both  
 1166 molecular (Bourguignon et al., 2015; Cameron et al., 2012; Inward et al., 2007; Thompson et al.,  
 1167 2000; Ware et al., 2010) and morphological (Engel et al., 2009) data.

1168 **CR4:** Yes (original description).

1169 **CR5:** Yes (see Section S2.3).

1170 **Phylogenetic justifications & discussion:**

1171 The placement of *Archeorhinotermes rossi* as stem-Neoisoptera (hence crown-  
 1172 (Kalotermitidae + Neoisoptera)) is based on the following character states:

1173 Ultimate level:

1174 Class 1: (1) frontal gland developed into distinct fontanelle; (2) forewing  
 1175 costalized.

1176 Class 2: none found / considered.

1177 Contextual level:

1178 Class 1 [stem-Isoptera / crown-(*Cryptocercus* + Isoptera)]: (3) in forewing,  
 1179 occurrence of a humeral suture.

1180 Class 2: none found / considered.

1181 The occurrence of a fontanelle (1) is discussed in the original description and the  
 1182 character was subjected to cladistics analysis by Engel et al. (2007). Accordingly, it provides  
 1183 unambiguous support to the clade (*Archeorhinotermes rossi* + Neoisoptera), Neoisoptera  
 1184 including the Rhinotermitidae (represented in our analysis) and several other families. The same  
 1185 applies to character state (2) (Engel et al., 2007). The sister-group to Neoisoptera being the  
 1186 Kalotermitidae, the species is suitable to calibrate the node Kalotermitidae + Neoisoptera.

1187

1188 **Calibrating node: stem-Isoptera / crown-(*Cryptocercus* + Isoptera)**

1189           **Preliminary remarks:** We scrutinized putative stem-Isoptera only (to our knowledge  
1190 there is no known fossil Cryptocercidae).

1191           **Fossil item: *Valditermes brenanae* Jarzembowski, 1981**

1192           **Original description:** Jarzembowski, E.A. (1981) An early Cretaceous termite from  
1193 southern England (Isoptera: Hodotermitidae). *Systematic Entomology*, **6**, 91–96.

1194           **Further descriptive accounts:** none.

1195           **Locality:** Clockhouse Brickworks pit (130.3 MYA).

1196           **CR1:** Holotype, In. 64588 (Natural History Museum, London, UK); paratypes, In.  
1197 64589-93 (Natural History Museum, London, UK).

1198           **CR2:** Yes (see below).

1199           **CR3:** The sister-group relationship between *Cryptocercus* and the termites is extremely  
1200 well supported by both molecular (Djernæs et al., 2015; Ware et al., 2008) and morphological  
1201 (Klass & Meier, 2006) data.

1202           **CR4:** Yes (see original description).

1203           **CR5:** Yes (see Section S2.3).

1204           **Phylogenetic justification & discussion:**

1205           The placement of *Valditermes brenanae* as stem-Isoptera (hence crown-(*Cryptocercus* +  
1206 Isoptera)) is based on the following character states:

1207           Ultimate level [stem-Blattodea / crown-Dictyoptera]:

1208           Class 1: (1) in forewing, occurrence of a humeral suture.

1209           Class 2: none found / considered.

1210           Contextual level:

1211           Class 1: none found / considered.

1212           Class 2: none found / considered.

1213           The supporting character state has long been recognized as unique to Isoptera (Belayeva,  
1214 2002; Grimaldi & Engel, 2005; Hennig, 1981; among recent accounts). Engel et al. (2009)  
1215 carried out a phylogenetic analysis including this species. They recovered it as stem-  
1216 Mastotermitidae (i.e., as crown-Isoptera). However, we noticed issues with the support to such  
1217 placement. Regarding the state ‘occurrence of cross-veins connecting longitudinal veins’ (their  
1218 character 54, state 1), it is coded absent (state 1) in the species while cross-veins are mentioned  
1219 and figured in the original description (Jarzembowski, 1981, fig. 6). The next character state  
1220 change to provide support (ambiguous) and for which the species is documented regards the  
1221 shape of the humeral margin of the forewing scale (character 64), documented as flat (state 0).  
1222 However, the condition for this character is not documented for *Cratomastotermes*  
1223 *wolfschwennigeri*, their recovered sister-group to the remaining Isoptera, in the close vicinity of  
1224 *Valditermes brenanae*. Therefore the polarity of the state is not evident. In summary, we  
1225 consider that the placement of *Valditermes brenanae* as crown-Isoptera is not firmly established,  
1226 and therefore conservatively consider it as a stem-Isoptera.

1227 Note that this fossil was selected for calibration by Bourguignon et al. (2018) as crown-  
 1228 Euisoptera *sensu* Engel et al. (2009). According to Engel et al. (2009), this fossil is a stem-  
 1229 Mastotermitidae. However, as mentioned above, the topology obtained by Engel et al. (2009) in  
 1230 this area of their proposal of phylogenetic relationships is poorly constrained. As used by  
 1231 Bourguignon et al. (2018), the fossil fails to fulfill **CR2**.

1232

1233 **Calibrating node: stem-Blaberidae / crown-(Blaberidae + (Blattellinae + Nyctiborinae))**

1234 **Fossil item: “Gyna” obesa Piton, 1940**

1235 **Original description:** Piton, L.E., 1940. Paléontologie du gisement éocène de Menat  
 1236 (Puy-de-Dôme) (flore et faune). *Mémoires de la Société d'Histoire Naturelle d'Auvergne*, **1**, 1–  
 1237 303.

1238 **Further descriptive accounts:** Evangelista et al. (2017).

1239 **Locality:** Menat (60.0 MYA).

1240 **CR1:** Holotype, MNHN.F.R06689 (Museum National d’Histoire Naturelle, Paris,  
 1241 France).

1242 **CR2:** Yes (see below).

1243 **CR3:** A clade comprising Blaberidae + Blattellinae + Nyctiborinae has been supported  
 1244 by both molecular (current study) and morphological (Klass & Meier, 2006) data.

1245 **CR4:** Yes (see Evangelista et al., 2017 and references therein).

1246 **CR5:** Yes (see Section S2.3).

1247 **Phylogenetic justification & discussion:**

1248 The placement of “Gyna” *obesa* as stem-Blaberidae (hence crown-(Blaberidae +  
 1249 (Blattellinae + Nyctiborinae))) is based on the following character states:

1250 Ultimate level:

1251 Class 1: (1) asymmetrically concave margin of subgenital plate.

1252 Class 2: (2) cerci stout.

1253 Contextual level:

1254 Class 1: none found / considered.

1255 Class 2: (3) in forewing, anterior and posterior margins parallel for a long distance.

1256 The original treatment of this taxon in Piton (1940) gave an overly specific systematic  
 1257 assignment based on the supposed occurrence of the character state ‘occurrence of a medial lobe  
 1258 along the posterior margin of the pronotum’. From certain angles the posterior edge of the  
 1259 pronotum appears to take two different paths, one tapered and another with a long medial  
 1260 extension (pers. obs.). The latter could indeed indicate a systematic placement to Epilamprinae or  
 1261 Gyninae (family Blaberidae), the latter being the hypothesis favoured by Piton (1940). However,  
 1262 Evangelista et al. (2017) provided detailed evidence showing that the occurrence of the character  
 1263 state is not evident in the fossil specimen.

1264 Yet, other character states present in “Gyna” *obesa* still strongly justify a  
 1265 placement in Blaberidae, in particular the subgenital plate shape [Evangelista et al., 2017; above,

1266 character state (1)], unique to the family (among Blattodea). Blaberidae is strongly considered  
 1267 monophyletic in nearly all molecule-based (Djernæs et al., 2012; Inward et al., 2007; Legendre et  
 1268 al., 2017; Legendre et al., 2015; Pellens et al., 2007; Ware et al., 2008) and morphology-based  
 1269 (Grandcolas, 1996) phylogenetic studies. Two other character states (2, and 3 above) further  
 1270 support this placement.

1271

1272 **Calibrating node: stem-Dictyoptera / crown-(Dictyoptera + (Eukinolabia + Xenonomia))**

1273 **Preliminary remarks:** The systematic affinities of the fossil taxon ‘Paoliida’ are herein  
 1274 considered unresolved given the contradictory contributions by Prokop et al. (2012), assuming  
 1275 them to represent stem-Pteryogta, and by Prokop et al. (2014), assuming them to represent stem-  
 1276 Dictyoptera. Moreover, the corresponding fossil species are contemporaneous with the favoured  
 1277 one below. These insects therefore are not further considered.

1278 The identification of Carboniferous and Permian ‘Strephocladidae’ as stem-Mantodea  
 1279 (Béthoux et al., 2010; Béthoux & Wieland, 2009) has been discussed and/or challenged by  
 1280 multiple authors (Gorochoy, 2013; Guan et al., 2016; Hörnig et al., 2013; Kukalová-Peck &  
 1281 Beutel, 2012), resulting in contradicting outputs. The corresponding fossil species therefore were  
 1282 not considered (and see ‘Section S2.2’, case of ‘*Homocladus grandis*’). We consider that the  
 1283 debate equally applies to the ‘Anthracoptilidae’, including the ‘Strephocladidae’ according to  
 1284 Guan et al. (2016).

1285 There is no known putative stem-representative of Xenonomia + Eukinolabia. All  
 1286 considered occurrences represent putative stem-Dictyoptera.

1287 **Fossil item: *Qilianiblatta namurensis* Zhang, Schneider & Hong, 2013**

1288 **Original description:** Zhang, Z., Schneider, J.W. & Hong, Y. (2013) The most ancient  
 1289 roach (Blattodea): a new genus and species from the earliest Late Carboniferous (Namurian) of  
 1290 China, with a discussion of the phylomorphogeny of early blattids. *Journal of Systematic*  
 1291 *Palaeontology*, **11**, 27–40.

1292 **Further descriptive accounts:** A specimen from the same locality as the holotype and  
 1293 forewings and hind wings was described by Guo et al. (2013). Further isolated wings from the  
 1294 same locality were described by Wei et al. (2013).

1295 **Locality:** Xiaheyan (306.9 MYA).

1296 **CR1:** holotype, GMCB 04GNX1001 (Geological Museum of China, Beijing, China);  
 1297 further specimens, CNU-NX1-301 to -304, -336, -337 (Capital Normal University, Beijing,  
 1298 China).

1299 **CR2:** Yes (see below).

1300 **CR3:** There are no morphological analyses that support the node Dictyoptera +  
 1301 (Xenonomia + Eukinolabia) but it is well supported by transcriptomic analysis (Misof et al.,  
 1302 2014; and current study). We thus encourage future workers to review current phylogenetic  
 1303 hypothesis when implementing this fossil in their calibration schemes.

1304 **CR4:** Yes (original description and further descriptive accounts).

1305 **CR5:** Yes (see Section S2.3).

1306 **Phylogenetic justification & discussion:**

1307 The placement of *Qilianiblatta namurensis* as stem-Dictyoptera [hence crown-  
1308 (Dictyoptera + (Eukinolabia + Xenonomia))] is based on the following character states:

1309 Ultimate level [stem-Blattodea / crown-Dictyoptera]:

1310 Class 1: (1) in forewing, pectinate fusion of RA onto RP (i.e. R –seemingly–  
1311 undivided, anteriorly pectinate); (2) in forewing, CuP bent posteriorly.

1312 Class 2: none.

1313 Contextual level:

1314 Class 1: none found / considered.

1315 Class 2: none found / considered.

1316 The seemingly undivided R displayed by cockroaches' forewing was demonstrated to be  
1317 the outcome of a pectinate fusion of RA onto RP by Guo et al. (2013) thanks to material of  
1318 *Qilianiblatta namurensis*. This trait has been traditionally regarded as diagnostic of Blattodea  
1319 (Ragge, 1955; Vršanský et al., 2002; represented in figures but not mentioned in Hennig, 1981).  
1320 As for Mantodea, Béthoux and Wieland (2009) and Brannoch et al. (2017) assumed that RA and  
1321 RP are distinct in forewings of Mantodea; as a consequence, the character state (1) would be  
1322 unique to Blattodea. However, the competing hypothesis, viz. that Mantodea also possess the  
1323 character state (1) [as assumed by Smart (1956) for *Chaeteessa*], cannot be confidently ruled out.  
1324 Indeed, ongoing research suggests that it must be considered the most plausible interpretation (O.  
1325 Béthoux and collaborators, in prep.).

1326 It must be noted that *Qilianiblatta namurensis* displays some polymorphism on this  
1327 character state. However, several other species which are only slightly younger [for example,  
1328 from the Commeny locality (298.8 MYA)] consistently display the character state [Béthoux et  
1329 al., 2011; Schneider, 1977, 1978, 1983]; and see Jarzembowski and Schneider (2007) on the sub-  
1330 contemporaneous occurrence of *Sooblatta villeti* (Pruvost, 1912)]. Moreover, some of these  
1331 species display the character state 'ScP reaching the anterior wing margin basally', a state  
1332 highlighted by Hennig (1981: pp. 204–205) as indicative of stem-Blattodea [see also Haas and  
1333 Kukalová-Peck (2001); the other character state this author considered, viz. 'AA veins reaching  
1334 the claval furrow', also occurs in Mantodea]. Note that the pronotum is documented in several of  
1335 them and is expanded laterally (see 'Section S2.2', case '*Miroblatta costalis*', for the relevance  
1336 of this character state).

1337 It must also be noted here that a pectinate fusion of RP onto RA occurs in forewings of  
1338 Hemerobiidae (Carpenter, 1940) and of the orthopteran *Exogryllacris ornata* (Anostomatidae;  
1339 see Béthoux, 2012b). This 'RP onto RA' fusion can be distinguished from that of 'RA onto RP'  
1340 based on the successive origins of *posterior* branches (representing RP branches; instead of the  
1341 successive origin of *anterior* branches, representing RA branches).

1342 To our knowledge, the character state is present in all extant Dictyoptera (inclusive of  
1343 Isoptera; some Blattodea display distal posterior branches possibly representing RP *partim*; and  
1344 see above regarding Mantodea), a clade which is possibly the best supported in insect phylogeny.

1345 The species is considered by Legendre et al. (2015) as a stem-Dictyoptera owing to the  
 1346 occurrence of a deeply concave CuP in forewing. Indeed, the character state ‘in forewing, CuP  
 1347 bent posteriorly’ has often been associated with the occurrence of a ‘claval furrow’ (e.g. in  
 1348 Grimaldi & Engel, 2005). Such structure has also been considered a putative diagnostic feature  
 1349 of Dictyoptera (Prokop et al., 2014). However a markedly concave CuP (or, a CuP associated  
 1350 with a marked concave fold) occurs in Plecoptera (O. Béthoux, pers. obs.) and stem-Embioptera  
 1351 (Shcherbakov, 2015); despite sclerotization, a process blurring vein elevation, CuP remains  
 1352 concave in its basal half in the stem-Dermaptera *Protelytron permianum* (see reflective  
 1353 transformation imaging, i.e. RTI, data associated with (Béthoux et al., 2016); stem-Paraneoptera  
 1354 also exhibit a markedly concave CuP (Nel et al., 2012); and the posterior branch of CuP is  
 1355 strongly concave in Palaeozoic stem-Orthoptera (O. Béthoux, pers. obs.). The association of CuP  
 1356 (or its posterior branch) with a deep furrow is therefore a trait most likely common to all  
 1357 Neoptera.

1358 We believe the trajectory of CuP must be considered a distinct character from its  
 1359 concavity. In all the above-mentioned cases CuP is straight, hence this state can be considered  
 1360 plesiomorphic within Neoptera, and a bent CuP derived (this polarization being in accordance  
 1361 with the obtained molecular-based topology). Although it has sometimes been considered  
 1362 diagnostic of Blattodea only, this character state is herein regarded as indicative of affinities with  
 1363 the whole Dictyoptera [a proposal in which we concur with Grimaldi and Engel (2005) and  
 1364 Legendre et al. (2015)]. Indeed, the stem-Mantodea *Santanmantis axelrodi* Grimaldi, 2003 (see  
 1365 original description –CuP indicated as ‘CuA<sub>2</sub>’) and *Cretophotina tristriata* Gratshev &  
 1366 Zherikhin, 1993 [see original description and Zherikhin (2002), Grimaldi (2003) –CuP indicated  
 1367 as ‘CuA<sub>2</sub>’], and, to some extent, *Metallyticus* spp. (see Béthoux & Wieland, 2009; Brannoch et  
 1368 al., 2017; Wieland, 2008), display a bent CuP. The occurrence of this character state therefore  
 1369 indicates a Dictyoptera (stem- or crown-).

1370

### 1371 **Calibrating node: stem-Mantophasmatodea / crown-Xenonomia**

1372 **Fossil item: *Juramantophasma sinica* Huang, Nel, Zompro & Waller, 2008**

1373 **Original description:** Huang, D.-y., Nel, A., Zompro, O. & Waller, A. (2008)  
 1374 Mantophasmatodea now in the Jurassic. *Naturwissenschaften*, **95**, 947–952.

1375 **Further descriptive accounts:** none.

1376 **Locality:** Daohugou (158.1 MYA).

1377 **CR1:** NIGP 142171 (Nanjing Institute of Geology and Palaeontology, Nanjing, China).

1378 **CR2:** Yes (see below).

1379 **CR3:** The Mantophasmatodea-Grylloblattodea sister-group relationship (i.e. Xenonomia)  
 1380 is well supported by both molecular (Misof et al., 2014; and current study) and morphological  
 1381 (Wipfler et al., 2015) data.

1382 **CR4:** Yes (original description).

1383 **CR5:** Yes (see Section S2.3).



1384 **Phylogenetic justifications & discussion:**

1385 The systematic placement of *Juramantophasma sinica* as stem-Mantophasmatodea  
1386 (hence crown-Xenonomia) is based on the following character states:

1387 Ultimate

1388 Class 1: none found / considered.

1389 Class 2: (1) enlarged and fan-like pretarsal arolia than can be lifted above the  
1390 ground; (2) head orthognathous.

1391 Contextual

1392 Class 1: none found / considered.

1393 Class 2: (3) wings absent (but see below regarding the level at which this state is  
1394 relevant).

1395 The character state (1) is well documented in *Juramantophasma sinica*. In the original  
1396 description it is formulated into several character states, including ‘enlarged and fan-like  
1397 pretarsal arolia with a clearly visible row of dorsal setae’ and ‘last tarsomere making a right  
1398 angle with the others, keeping it up in the air’. We believe these states form a single one (because  
1399 they always co-occur and putatively compose a single functional unit), as labelled above. The  
1400 state is also present in other Polyneopteran groups such as some Phasmatodea (including  
1401 *Timema*, very generally regarded as sister-group to the remaining crown-Phasmatodea; Beutel &  
1402 Gorb, 2008; Bradler, 2009; Kristensen, 1975) and the extinct order Alienoptera (Bai et al., 2016;  
1403 regarded as Dictyoptera). Given that it is absent in Grylloblattodea, the state is therefore  
1404 considered relevant at the ultimate level but relegated as Class 2.

1405 The holotype (and only known specimen) of *Juramantophasma sinica* displays an  
1406 orthognathous head (2; this is more evident when merging published photographs of both slabs  
1407 preserving the specimen). Head orthognathy is also present in the sister-group of Xenonomia +  
1408 Eukinolabia, namely Dictyoptera. However, given the obtained topology, it is more  
1409 parsimonious to assume a convergent acquisition in Mantophasmatodea. Therefore we consider  
1410 that the character state applies at the ultimate level but belongs to Class 2.

1411 The lack of wings (3) is a prominent state. There is no doubt the holotype is an adult,  
1412 owing to the occurrence of eggs in the abdomen and of developed genitalia. Extant  
1413 Mantophasmatodea and Grylloblattodea both lack wings, and therefore it has been proposed as  
1414 diagnostic character state of Xenonomia (Grimaldi & Engel, 2005; Wipfler et al., 2015).  
1415 However, fossil species regarded by some as stem-Grylloblattodea possess wings (Rasnitsyn,  
1416 1976 and multiple more recent accounts on related fossils), and therefore the character state  
1417 could be considered relevant at the contextual level (as indicated above). It must be noted that  
1418 the absence of wings is common among Phasmatodea, including *Timema*. On the other hand,  
1419 well-ascertained stem-Phasmatodea, such as *Renphasma sinica* (Nel & Delfosse, 2011) (see  
1420 original description and Wang et al., 2014) are winged. Therefore, the state is considered as  
1421 Class 2.

1422 The third tarsomere with a sclerotized elongated dorsal process was listed by Huang et al.  
1423 (2008) as demonstrative of the mantophasmatodean affinities of *Juramantophasma sinica*.

1424 Indeed, such a structure has been described for a large variety of extant Mantophasmatodea  
 1425 (Buder & Klass, 2013) where it occurs as a ‘tiny’ convex process. Contrasting, in  
 1426 *Juramantophasma sinica* it is ‘spine-like’ and ‘slightly curved’ (original description) and very  
 1427 long. As a consequence, strict homology of the two structures is not evident. Another character  
 1428 state Huang et al. (2008) considered is ‘female gonoplags (valves 3) short and claw-shaped’.  
 1429 However, in the actual description they state ‘they probably correspond to the gonoplags IX  
 1430 ‘gl9’ sensu Klass et al. (2003; Fig.1d)’. Since the identification and homology of the  
 1431 corresponding structure cannot be ascertained, we consider this an insufficient argument. A  
 1432 further character state Huang et al. (2008) considered is ‘egg with a circular ridge’ and ‘egg  
 1433 large, elongate, and a chorion with a pattern of small spots and a central gibbosity’. However no  
 1434 details about the eggs are provided in the description other than their number and their  
 1435 arrangement. Moreover the polarity of the states is not evident, as well as the intended meaning  
 1436 of the character state itself. Several other character states considered by Huang et al. (2008); e.g.  
 1437 lack of ocelli, morphology of antenna, respective proportions of meso- and metanotum,  
 1438 ovipositor length) were not confirmed or are common among Polyneopteran groups.

1439 In summary the placement of *Juramantophasma sinica* as stem-Mantophasmatodea is  
 1440 only based on a set of Class 2 character states. However, provided that the placement of the  
 1441 species at any other node would imply further homoplasy, and despite the relative weakness of  
 1442 the supporting character states, the species is selected as stem-Mantophasmatodea.

1443

#### 1444 **Calibrating node: stem-Embioptera / crown-Eukinolabia**

1445 **Fossil item: *Alexarasnia rossica* Gorochov, 2011**

1446 **Original description:** Gorochov, A.V. (2011) A new, enigmatic family for new genus  
 1447 and species of Polyneoptera from the Upper Permian of Russia. *Zookeys*, **130**, 131–136.

1448 **Further descriptive accounts:** Shcherbakov (2015) [see also Aristov (2017) on a  
 1449 congeneric, slightly younger species].

1450 **Locality:** Isady (254.1 MYA).

1451 **CR1:** PIN 3840/63 (Palaeontological Institute, Moscow, Russia).

1452 **CR2:** See below.

1453 **CR3:** The Phasmatodea-Embioptera sister-group relationship (i.e. Eukinolabia) is well  
 1454 supported by both molecular (Misof et al., 2014; among others; and current study) and  
 1455 morphological (Bradler, 2009; Friedmann et al., 2012) data.

1456 **CR4:** Yes (original description and further descriptive account).

1457 **CR5:** Yes (see Section S2.3).

#### 1458 **Phylogenetic justification & discussion:**

1459 The placement of *Alexarasnia rossica* as stem-Embioptera (hence crown-Eukinolabia) is  
 1460 based on the following character states:

1461 Ultimate level:



1462 Class 1: (1) in both wing pairs, RA (at least in middle part) margined along both  
 1463 edges by membranous, hyaline lines ('radial border lines'); (2) occurrence of a blood sinus  
 1464 along RA.

1465 Class 2: none found / considered.

1466 Contextual level:

1467 Class 1: (3) in both wing pairs, in the area between ScP and AA1, occurrence of  
 1468 intervenal hyaline & concave lines.

1469 Class 2: none found / considered.

1470 The species was originally considered a Polyneopteran of uncertain affinities (Gorochov,  
 1471 2011). A thorough account on stem-Embioptera was provided by Shcherbakov (2015) who  
 1472 identified *Alexarasnia rossica* as the most ancient representative of total-Embioptera, on the  
 1473 basis of the character states (1), (2) and (3) (herein slightly reformulated), previously considered  
 1474 unique to Embioptera (Ross, 2000). Herein we consider the occurrence of the 'radial border  
 1475 lines' (1) as a character state distinct from that of a blood sinus (2), itself substantiated by a  
 1476 lumina located in the middle of RA along its course (a distinction considered by D.  
 1477 Shcherbakov's, pers. com. to O. Béthoux, 2017).

1478 The level at which the character state (3) is relevant is not evident, in particular in the  
 1479 context of a Phasmatodea + Embioptera sister-group relationships. Indeed such hyaline lines  
 1480 occur more or less continuous in the distal part of forewings of *Heteropteryx dilatata*, one of the  
 1481 few extant Phasmatodea with long forewings (see Shang et al., 2011, fig. 4A; and O. Béthoux,  
 1482 pers. obs.; and, to a lesser extent, in *Prisopus* sp., O. Béthoux pers. obs.). Note that Shcherbakov  
 1483 (2015) considered, in his discussion, the weakening of cross-veins crossed by these hyaline lines.  
 1484 The occurrence of this condition is not evident in *Alexarasnia rossica* (which, in that respect,  
 1485 resembles *Heteropteryx dilatata*). The character might therefore be relevant at the level of stem-  
 1486 Eukinolabia (and is therefore conservatively relegated at the contextual level above).

1487 For the record, the forewings of some Gripopterygidae (Plecoptera) also display some  
 1488 degree of concavity in intervenal areas in connection with cross-veins weakened in their middle  
 1489 (Béthoux, 2005; Y. Cui and O. Béthoux, pers. obs.), but only in the distal half of the forewing.  
 1490 This is also the case in both wing pairs in *Mantoida* (Mantodea; O. Béthoux, pers. obs.).  
 1491 However none of the corresponding species display continuous hyaline lines.

1492 Finally, Shcherbakov (2015) considered the tendency of veins and/or intercalary hyaline  
 1493 lines to display an alteration of their course when approaching the posterior wing margin. As a  
 1494 consequence veins and/or hyaline lines are parallel to the posterior wing margin for some  
 1495 distance. However this deflection only concerns hyaline lines in crown-Embioptera, and only  
 1496 veins in *Alexarasnia rossica*. The strict homology of these two conditions is therefore not  
 1497 straightforward

1498 The species can be readily excluded from crown-Embioptera owing to the lack of the RP  
 1499 + M fusion, among other character states (Shcherbakov, 2015). For the record, Shcherbakov  
 1500 (2015) also discussed the case of *Soyana* spp. as a putative, slightly more ancient, stem-  
 1501 Embioptera, but evidence was admittedly less conclusive.

1502

1503 **Calibrating node: stem-Ensifera / crown-Orthoptera**

1504 **Preliminary remarks:** Béthoux and Nel (2002) regarded ‘elcanids’ as sister-group  
 1505 related with Caelifera. If so, these are crown-Orthoptera. This proposal was challenged by A.  
 1506 Gorochov (pers. com.), who assumed that the recovered relationships was an artefact due to  
 1507 convergence towards elongate forewings, which is an acceptable criticism. The corresponding  
 1508 species therefore were not considered. Stem-Caelifera were also considered but they represent  
 1509 calibration points younger than the fossil species selected below.

1510 **Fossil item: *Raphogla rubra* Béthoux, Nel, Lapeyrie, Gand & Galtier, 2002**

1511 **Original description:** Béthoux, O., Nel, A., Lapeyrie, J., Gand, G. & Galtier, J. (2002)  
 1512 *Raphogla rubra* gen. n., sp. n., the oldest representative of the clade of modern Ensifera  
 1513 (Orthoptera: Tettigoniidea & Gryllidea) (Lodève Permian basin, France). *European Journal of*  
 1514 *Entomology*, **99**, 111–116.

1515 **Further descriptive accounts:** A new photograph of the holotype was published as fig.  
 1516 1C in Wolfe et al. (2016).

1517 **Locality:** Lodève (271.8).

1518 **CR1:** Ld LAP 415 (Musée Fleury, Lodève, France).

1519 **CR2:** Yes (see below).

1520 **CR3:** The Ensifera + Caelifera sister-group relationship (i.e. Orthoptera) is well  
 1521 supported by both molecular ((Misof et al., 2014); and current study) and morphological  
 1522 ((Kristensen, 1981); among many others) data.

1523 **CR4:** Yes (see original description).

1524 **CR5:** Yes (see Section S2.3).

1525 **Phylogenetic justification & discussion:**

1526 The placement of *Raphogla rubra* as stem-Ensifera (hence crown-Orthoptera) is based on  
 1527 the following character states:

1528 Ultimate level:

1529 Class 1: (1) in forewing, branching pattern of CuA + CuP $\alpha$  as follows: first branch  
 1530 (CuP $\alpha$ 2) posteriorly directed, second branch (CuA) anteriorly directed, following  
 1531 branches (CuP $\alpha$ 1) variable; (2) in forewing, branches of ScP with convex intercalary  
 1532 veins between them.

1533 Class 2: none found / considered.

1534 Contextual level:

1535 Class 1: none found / considered.

1536 Class 2: none found / considered.

1537 The character state (1) was first recognized in the original description of *Raphogla rubra*,  
 1538 but under a different scheme of wing venation homologies from the one favoured herein. The  
 1539 first anterior branch of the CuA + CuP $\alpha$  ‘system’ was interpreted as CuA (alone) by Béthoux  
 1540 (2012a). Stem-Orthoptera also possessing a branched CuPa (such as *Oedischia williamsoni*) have

1541 a CuA + CuPaa overall posteriorly pectinate [which is the assumed plesiomorphic condition, and  
 1542 is interpreted by Béthoux (2012a) as a CuA remaining fused with CuPaa until it reaches the  
 1543 posterior wing margin]. The character state therefore undoubtedly is derived.

1544 Among extant species, the character state (1) occurs in Hagloidea and Tettigonioidea  
 1545 (Béthoux, 2012a; Chivers et al., 2017), but is absent in Grylloidea, as a consequence of a  
 1546 translocation of CuA onto M, and is further altered in Gryllotalpoidea (Béthoux, 2012a). Yet it is  
 1547 present in putative stem-Grylloidea [or stem-(Gryllotalpoidea + Grylloidea); (Béthoux, 2012a;  
 1548 Sharov, 1968, 1971)]. Notably, it is absent in Stenopelmatoidea (Béthoux, 2012b; and see  
 1549 below).

1550 The character state (2) is equally relevant. It was mentioned in the original description of  
 1551 *Raphogla rubra* and its distribution was also formally tested in a cladistic analysis by Béthoux  
 1552 and Nel (2002). It proved diagnostic of a subset of stem-Ensifera, best known from abundant  
 1553 Triassic material (Béthoux & Nel, 2002; Sharov, 1968, 1971), including species for which the  
 1554 occurrence of an ensiferan-type stridulatory file has been ascertained (Béthoux, 2012a). Note that  
 1555 Garrouste et al. (2016) erroneously asserted that the occurrence of this state is rare (and see the  
 1556 *Permotettigonia gallica* case in the ‘Section S2.2’).

1557 According to Béthoux and Nel (2002) and Béthoux (2012b), *Raphogla rubra* is more  
 1558 closely related to Grylloidea, Hagloidea, and Tettigonioidea than to the Stenopelmatoidea, owing  
 1559 to the lack of the character states (1) and (2) in the latter. However, Song et al. (2015) proposed  
 1560 the following topology: (Gryllotalpoidea + Grylloidea) + ((Stenopelmatoidea + Hagloidea) +  
 1561 Tettigonioidea) (and see Zhou et al., 2017). This would imply that the selected character states  
 1562 are homoplastic, and that *Raphogla rubra* could equally be a stem-Ensifera. In summary the  
 1563 position of the species either as stem-Ensifera or crown-Ensifera is contentious due to  
 1564 inconsistencies between morphology and the molecular-based topologies. Note that the issue was  
 1565 not considered in recent surveys on fossil calibration points for insect phylogeny (Wang et al.,  
 1566 2016; Wolfe et al., 2016). The species is then best considered a stem-Ensifera, a level at which  
 1567 morphology and molecules are congruent (assuming reversal in Stenopelmatoidea).

1568

#### 1569 **Calibrating node: Stem-Dermaptera / crown-(Zoraptera + Dermaptera)**

1570 **Preliminary remarks:** The earliest putative stem-Zoraptera are very recent (Engel &  
 1571 Grimaldi, 2002) if compared to the favoured case. Therefore, they were not considered.

1572 **Fossil item: *Protelytron permianum* Tillyard, 1913**

1573 **Original description:** Tillyard, R.J. (1931) Kansas Permian insects. Part 13. The new  
 1574 order Protelytroptera, with a discussion of its relationships. *American Journal of Science* (5), **21**,  
 1575 232–266.

1576 **Further descriptive accounts:** The species holotype was revised by Béthoux et al.  
 1577 (2016). Previous descriptive accounts are listed by these authors.

1578 **Locality:** Elmo (271.8 MYA).

1579 **CR1:** holotype, YPM IP 001019 (Yale Peabody Museum, New Haven, USA; additional  
 1580 specimens not considered in (Béthoux et al., 2016).

1581 **CR2:** Yes (see below).

1582 **CR3:** There is no morphological analysis that supports the Zoraptera + Dermaptera  
1583 sister-group relationship, but it is well supported by transcriptomic analysis (Misof et al., 2014).  
1584 We thus encourage future workers to review current phylogenetic hypothesis when  
1585 implementing this fossil in their calibration schemes.

1586 **CR4:** Yes (original description and further descriptive accounts).

1587 **CR5:** Yes (see Section S2.3).

### 1588 **Phylogenetic justification & discussion:**

1589 The placement of *Protelytron permianum* as stem-Dermaptera (hence crown-(Zoraptera +  
1590 Dermaptera) is based on the following character states:

#### 1591 Ultimate level:

1592 Class 1: (1) in hind wing, occurrence of vein broadenings forming an arc (i.e.,  
1593 occurrence of a ring fold).

1594 Class 2: (2) forewing sclerotized.

#### 1595 Contextual level:

1596 Class 1: none found / considered.

1597 Class 2: none found / considered.

1598 The identification of this species as a stem-Dermaptera can hardly be disputed: the  
1599 occurrence of character state (1) is well ascertained and it is unique to Dermaptera. Given the  
1600 obtained topology, the character state (2) can be considered relevant at the ultimate level. The  
1601 lack of intercalary veins between the main veins of the hind wing vannus indicates that it is not a  
1602 crown-Dermaptera. Other, related species composing the stem-group of Dermaptera  
1603 ('Protelytroptera') have been documented from sub-contemporaneous localities (Carpenter,  
1604 1992; Kukalová, 1965; Shcherbakov, 2002), but they are not as well-documented as *Protelytron*  
1605 *permianum* is.

1606

### 1607 **References**

1608 Aristov, D.S. (2017) New insects (Insecta: Eoblattida, Embiida) from the Permian of Russia and  
1609 the Triassic of Kyrgyzstan, with observations on the origin of webspinners. *Paleontological*  
1610 *Journal*, **51**, 161–170.

1611 Bai, M., Beutel, R.G., Klass, K.-D., Zhang, W., Yang, X., & Wipfler, B. (2016) †Alienoptera —  
1612 A new insect order in the roach–mantodean twilight zone. *Gondwana Research*, **39**, 317–326.

1613 Beccaloni, G. (2014) Cockroach Species File Online. Version 5.0/5.0.

1614 Belayeva, N.V. (2002). Order Termitida Latreille, 1802. The termites (=Isoptera Brullé, 1832).  
1615 In History of Insects (ed. by A.P. Rasnitsyn & D.L.J. Quicke), pp. 270–273. Kluwer Academic  
1616 Publishers, Dordrecht.

1617 Béthoux, O. (2005) Wing venation pattern of Plecoptera (Neoptera). *Illiesia*, **1**, 52–81.

- 1618 Béthoux, O. (2012a) *Grylloptera* – a unique origin of the stridulatory file in katydids, crickets,  
1619 and their kin (*Archaeorthoptera*). *Arthropod Systematics & Phylogeny*, **70**, 43–68.
- 1620 Béthoux, O. (2012b) King crickets, raspy crickets & weta, their wings, their fossil relatives.  
1621 *Journal of Orthoptera Research*, **21**, 179–225.
- 1622 Béthoux, O., Beckemeyer, R.J., Engel, M.S., & Hall, J.D. (2010) New data on *Homocladus*  
1623 *grandis*, a Permian stem-mantodean (Polyneoptera: Dictyoptera). *Journal of Paleontology*, **84**,  
1624 746–753.
- 1625 Béthoux, O., Klass, K.-D., & Schneider, J.W. (2009) Tackling the ‘Protoblattoidea problem’:  
1626 revision of *Protoblattinopsis stubblefieldi* Laurentiaux, 1953 (Dictyoptera; Late Carboniferous).  
1627 *European Journal of Entomology*, **106**, 145–152.
- 1628 Béthoux, O., Llamosi, A., & Toussaint, S. (2016) Reinvestigation of *Protelytron permianum*  
1629 (Insecta; Early Permian; USA) as an example for applying reflectance transformation imaging to  
1630 insect imprint fossils. *Fossil Record*, **20**, 1–7.
- 1631 Béthoux, O. & Nel, A. (2002) Venation pattern and revision of Orthoptera sensu nov. and sister  
1632 groups. Phylogeny of Palaeozoic and Mesozoic Orthoptera sensu nov. *Zootaxa*, **96**, 1–88.
- 1633 Béthoux, O., Schneider, J.W., & Klass, K.-D. (2011) Redescription of the holotype of  
1634 *Phyloblatta gaudryi* (Agnus, 1903) (Pennsylvanian; Commeny, France), an exceptionally well-  
1635 preserved stem-dictyopteran. *Geodiversitas*, **33**, 625–635.
- 1636 Béthoux, O. & Wieland, F. (2009) Evidence for Carboniferous origin of the order Mantodea  
1637 (Insecta: Dictyoptera) gained from forewing morphology. *Zoological Journal of the Linnean*  
1638 *Society*, **156**, 79–113.
- 1639 Beutel, R.G. & Gorb, S. (2008) Evolutionary scenarios for unusual attachment devices of  
1640 Phasmatodea and Mantophasmatodea (Insecta). *Systematic Entomology*, **33**, 501–510.
- 1641 Bourguignon, T., Lo, N., Cameron, S.L., Šobotník, J., Hayashi, Y., Shigenobu, S., Watanabe, D.,  
1642 Roisin, Y., Miura, T., & Evans, T.A. (2015) The evolutionary history of termites as inferred from  
1643 66 mitochondrial genomes. **32**, 406–421.
- 1644 Bourguignon, T., Qian, T., Ho, S.Y.W., Juna, F., Wang, Z., Arab, D.A., Cameron, S.L., Walker,  
1645 J., Rentz, D.C.F., Evans, T.A., & Lo, N. (in press) Transoceanic dispersal and plate tectonics  
1646 shaped global cockroach distributions: evidence from mitochondrial phylogenomics. *Molecular*  
1647 *Biology and Evolution*.
- 1648 Bradler, S. (2009) Die Phylogenie der Stab- und Gespentschrecken (Insecta: Phasmatodea).  
1649 *Species, Phylogeny & Evolution*, **2**, 3–139.
- 1650 Brannoch, S.K., Wieland, F., Rivera, J., Klass, K.-D., Béthoux, O., & Svenson, G.J. (2017)  
1651 Manual of praying mantis morphology, nomenclature, and practices (Insecta, Mantodea).  
1652 *Zookeys*, **696**, 1–100.

- 1653 Buder, G. & Klass, K.-D. (2013) The morphology of tarsal processes in Mantophasmatodea.  
1654 *Deutsche Entomologische Zeitschrift*, **60**, 5–23.
- 1655 Cameron, S.L., Logar, N.J., Bourguignon, T., Svenson, G.J., & Evans, T.A. (2012) A  
1656 mitochondrial genome phylogeny of termites (Blattodea: Termitoidae): robust support for  
1657 interfamilial relationships and molecular synapomorphies define major clades. *Molecular*  
1658 *Phylogenetics and Evolution*, **65**, 163–173.
- 1659 Carpenter, F.M. (1940) A revision of the Nearctic Hemerobiidae, Berothidae, Sisyridae,  
1660 Polystoechotidae and Dilaridae (Neuroptera). *Proceedings of the American Academy of Arts and*  
1661 *Sciences*, **74**, 193–280.
- 1662 Carpenter, F.M. (1992). Superclass Hexapoda. In *Treatise on Invertebrate Paleontology* (ed. by  
1663 R.L. Kaesler), Vol. 4, pp. xxii+655. The Geological Society of America and the University of  
1664 Kansas, Boulder.
- 1665 Chivers, B.D., Béthoux, O., Sarria-S., F.A., Jonsson, T., Mason, A.C., & Montealegre-Z., F.  
1666 (2017) Functional morphology of tegmina-based stridulation in the relict species *Cyphoderris*  
1667 *monstrosa* (Orthoptera: Ensifera: Prophalangopsidae). *Journal of Experimental Biology*, **220**,  
1668 1112–1121.
- 1669 Djernæs, M., Klass, K.-D., & Eggleton, P. (2015) Identifying possible sister groups of  
1670 Cryptocercidae+Isoptera: A combined molecular and morphological phylogeny of Dictyoptera.  
1671 *Molecular Phylogenetics and Evolution*, **84**, 284–303.
- 1672 Djernæs, M., Klass, K.-D., Picker, M.D., & Damgaard, J. (2012) Phylogeny of cockroaches  
1673 (Insecta, Dictyoptera, Blattodea), with placement of aberrant taxa and exploration of out-group  
1674 sampling. *Systematic Entomology*, **37**, 65–83.
- 1675 Engel, M.S. & Grimaldi, D. (2002) The first Mesozoic Zoraptera (Insecta). *American Museum*  
1676 *Novitates*, **3362**, 1–7.
- 1677 Engel, M.S., Grimaldi, D., & Krishna, K. (2007) Primitive termites from the Early Cretaceous of  
1678 Asia (Isoptera). *Stuttgarter Beiträge zur Naturkunde (B)*, **371**, 1–32.
- 1679 Engel, M.S., Grimaldi, D., & Krishna, K. (2009) Termites (Isoptera): their phylogeny,  
1680 classification, and rise to ecological dominance. *American Museum Novitates*, **3650**, 1–27.
- 1681 Evangelista, D.A., Djernæs, M., & Kohli, M.K. (2017) Fossil calibrations for the cockroach  
1682 phylogeny (Insecta, Dictyoptera, Blattodea), comments on the use of wings for their  
1683 identification, and a redescription of the oldest Blaberidae. *Palaeontologia Electronica*,  
1684 **20.3.1FC**, 1–23.
- 1685 Friedmann, K., Wipfler, B., Bradler, S., & Beutel, R.G. (2012) On the head morphology of  
1686 *Phyllium* and the phylogenetic relationships of Phasmatodea (Insecta). *Acta Zoologica*, **93**, 184–  
1687 199.



- 1688 Garrouste, R., Hugel, S., Jacquelin, L., Rostan, P., Steyer, J.-S., Desutter-Grandcolas, L., & Nel,  
1689 A. (2016) Insect mimicry of plants dates back to the Permian. *Nature Communications*, **7**, 13735.
- 1690 Gorochov, A.V. (2011) A new, enigmatic family for new genus and species of Polyneoptera  
1691 from the Upper Permian of Russia. *Zookeys*, **130**, 131–136.
- 1692 Gorochov, A.V. (2013) No evidence for Paleozoic origin of mantises (Dictyoptera: Mantina).  
1693 *Zoosystematica Rossica*, **22**, 6–14.
- 1694 Grandcolas, P. (1996) The phylogeny of cockroach families: a cladistic appraisal of morpho-  
1695 anatomical data. *Canadian Journal of Zoology*, **74**, 508–527.
- 1696 Grimaldi, D. (2003) A revision of Cretaceous mantises and their relationships, including new  
1697 taxa (Insecta: Dictyoptera: Mantodea). *American Museum Novitates*, **3412**, 1–47.
- 1698 Grimaldi, D. & Engel, M.S. (2005) *Evolution of the Insects* Cambridge University Press, New  
1699 York.
- 1700 Guan, Z., Prokop, J., Roques, P., Lapeyrie, J., & Nel, A. (2016) Revision of the enigmatic insect  
1701 family Anthracoptilidae enlightens the evolution of Palaeozoic stem-Dictyopterans. *Acta*  
1702 *Palaeontologica Polonica*, **61**, 71–87.
- 1703 Guo, Y., Béthoux, O., Gu, J., & Ren, D. (2013) Wing venation homologies in Pennsylvanian  
1704 ‘cockroachoids’ (Insecta) clarified thanks to a remarkable specimen from the Pennsylvanian of  
1705 Ningxia (China). *Journal of Systematic Palaeontology*, **11**, 41–46.
- 1706 Haas, F. & Kukalová-Peck, J. (2001) Dermaptera hindwing structure and folding: New evidence  
1707 for familial, ordinal and superordinal relationships within Neoptera (Insecta). *European Journal*  
1708 *of Entomology*, **98**, 445–509.
- 1709 Hennig, W. (1981) *Insect Phylogeny* Wiley & Sons, New York.
- 1710 Hörnig, M.k., Haug, J.T., & Haug, C. (2013) New details of *Santanmantis axelrodi* and the  
1711 evolution of the mantodean morphotype. *Palaeodiversity*, **6**, 157–168.
- 1712 Huang, D.-y., Nel, A., Zompro, O., & Waller, A. (2008) Mantophasmatodea now in the Jurassic.  
1713 *Naturwissenschaften*, **95**, 947–952.
- 1714 Inoue, J., Donoghue, P.C., & Yang, Z. (2010) The impact of the representation of fossil  
1715 calibrations on Bayesian estimation of species divergence times. *Syst Biol*, **59**, 74–89.
- 1716 Inward, D., Beccaloni, G., & Eggleton, P. (2007) Death of an order: a comprehensive  
1717 phylogenetic study confirms that termites are eusocial cockroaches. *Biology Letters*, **3**, 331–335.
- 1718 Jarzembowski, E.A. (1981) An early Cretaceous termite from southern England (Isoptera:  
1719 Hodotermitidae). *Systematic Entomology*, **6**, 91–96.

- 1720 Jarzembowski, E.A. & Schneider, J.W. (2007) The stratigraphical potential of blattodean insects  
1721 from the late Carboniferous of southern Britain. *Geological Magazine*, **144**, 1–8.
- 1722 Klass, K.-D. & Meier, R. (2006) A phylogenetic analysis of Dictyoptera (Insecta) based on  
1723 morphological characters. *Entomologische Abhandlungen*, **63**, 3–50.
- 1724 Kristensen, N.P. (1975) The phylogeny of hexapod "orders". A critical review of recent  
1725 accounts. *Zeitschrift für zoologische Systematik und Evolutionsforschung*, **13**, 1–44.
- 1726 Kristensen, N.P. (1981) Phylogeny of insect orders. *Annual Review of Entomology*, **26**, 135–157.
- 1727 Kukalová-Peck, J. & Beutel, R.G. (2012) Is the Carboniferous †*Adiphlebia lacoana* really the  
1728 "oldest beetle"? Critical reassessment and description of a new Permian beetle family. *European*  
1729 *Journal of Entomology*, **109/110**, 633–645/180.
- 1730 Kukalová, J. (1965) Permian Protelytroptera, Coleoptera and Protorthoptera (Insecta) of  
1731 Moravia. *Sbornik Geologických Ved, Paleontologie*, **6**, 61–95.
- 1732 Lee, S.-W. (2016) Taxonomic diversity of cockroach assemblages (Blattaria, Insecta) of the  
1733 Aptian Crato Formation (Cretaceous, NE Brazil). *Geologica Carpathica*, **67**, 433–450.
- 1734 Legendre, F., Grandcolas, P., & Thouzé, F. (2017) Molecular phylogeny of Blaberidae  
1735 (Dictyoptera, Blattodea), with implications for taxonomy and evolutionary scenarios. *European*  
1736 *Journal of Taxonomy*, **291**, 1–13.
- 1737 Legendre, F., Nel, A., Svenson, G.J., Robillard, T., Pellens, R., & Grandcolas, P. (2015)  
1738 Phylogeny of Dictyoptera: Dating the origin of cockroaches, praying mantises and termites with  
1739 molecular data and controlled fossil evidence. *PLoS One*, **10**, e0130127.
- 1740 Misof, B., Liu, S., Meusemann, K., Peters, R.S., Donath, A., Mayer, C., Frandsen, P.B., Ware, J.,  
1741 Flouri, T., Beutel, R.G., Niehuis, O., Petersen, M., Izquierdo-Carrasco, F., Wappler, T., Rust, J.,  
1742 Aberer, A.J., Aspöck, U., Aspöck, H., Bartel, D., Blanke, A., Berger, S., Böhm, A., Buckley,  
1743 T.R., Calcott, B., Chen, J., Friedrich, F., Fukui, M., Fujita, M., Greve, C., Grobe, P., Gu, S.,  
1744 Huang, Y., Jermini, L.S., Kawahara, A.Y., Krogmann, L., Kubiak, M., Lanfear, R., Letsch, H.,  
1745 Li, Y., Li, Z., Li, J., Lu, H., Machida, R., Mashimo, Y., Kapli, P., McKenna, D.D., Meng, G.,  
1746 Nakagaki, Y., Navarrete-Heredia, J.L., Ott, M., Ou, Y., Pass, G., Podsiadlowski, L., Pohl, H.,  
1747 von Reumont, B.M., Schütte, K., Sekiya, K., Shimizu, S., Slipinski, A., Stamatakis, A., Song,  
1748 W., Su, X., Szucsich, N.U., Tan, M., Tan, X., Tang, M., Tang, J., Timelthaler, G., Tomizuka, S.,  
1749 Trautwein, M., Tong, X., Uchifune, T., Walz, M.G., Wiegmann, B.M., Wilbrandt, J., Wipfler,  
1750 B., Wong, T.K.F., Wu, Q., Wu, G., Xie, Y., Yang, S., Yang, Q., Yeates, D.K., Yoshizawa, K.,  
1751 Zhang, Q., Zhang, R., Zhang, W., Zhang, Y., Zhao, J., Zhou, C., Zhou, L., Ziesmann, T., Zou, S.,  
1752 Li, Y., Xu, X., Zhang, Y., Yang, H., Wang, J., Wang, J., Kjer, K.M., et al. (2014) Phylogenomics  
1753 resolves the timing and pattern of insect evolution. *Science*, **346**, 763–767.
- 1754 Nel, A. & Delfosse, E. (2011) A new Chinese Mesozoic stick insect. *Acta Palaeontologica*  
1755 *Polonica*, **56**, 429–432.

- 1756 Nel, A., Prokop, J., Grandcolas, P., Garrouste, R., Lapeyrie, J., Legendre, F., Anisyutkin, L.N., &  
1757 Kirejtshuk, A.G. (2014) The beetle-like Palaeozoic and Mesozoic roachoids of the so-called  
1758 "umenocoleoid" lineage (Dictyoptera: Ponopterixidae fam. nov.). *Comptes Rendus Palevol*, **13**,  
1759 545–554.
- 1760 Nel, A., Prokop, J., Nel, P., Grandcolas, P., Huang, D.-Y., Roques, P., Guilbert, E., Dostál, O., &  
1761 Szwedo, J. (2012) Traits and evolution of wing venation pattern in Paraneopteran insects.  
1762 *Journal of Morphology*, **273**, 480–506.
- 1763 Parham, J.F., Donoghue, P.C., Bell, C.J., Calway, T.D., Head, J.J., Holroyd, P.A., Inoue, J.G.,  
1764 Irmis, R.B., Joyce, W.G., Ksepka, D.T., Patane, J.S., Smith, N.D., Tarver, J.E., van Tuinen, M.,  
1765 Yang, Z., Angielczyk, K.D., Greenwood, J.M., Hipsley, C.A., Jacobs, L., Makovicky, P.J.,  
1766 Muller, J., Smith, K.T., Theodor, J.M., Warnock, R.C., & Benton, M.J. (2012) Best practices for  
1767 justifying fossil calibrations. *Systematic Biology*, **61**, 346–59.
- 1768 Pellens, R., D'Haese, C.A., Belles, X., Piulachs, M.D., Legendre, F., Wheeler, W.C., &  
1769 Grandcolas, P. (2007) The evolutionary transition from subsocial to eusocial behaviour in  
1770 Dictyoptera: Phylogenetic evidence for modification of the "shift-in-dependent-care" hypothesis  
1771 with a new subsocial cockroach. *Molecular Phylogenetics and Evolution*, **43**, 616–626.
- 1772 Piton, L.E. (1940) Paléontologie du gisement éocène de Menat (Puy-de-Dôme) (flore et faune).  
1773 *Mémoires de la Société d'Histoire Naturelle d'Auvergne*, **1**, 1–303.
- 1774 Prokop, J., Krzeminski, W., Krzeminska, E., Hörschemeyer, T., Ilger, J.-M., Brauckmann, B.,  
1775 Grandcolas, P., & Nel, A. (2014) Late Palaeozoic Paoliida is the sister group of Dictyoptera  
1776 (Insecta: Neoptera). *Journal of Systematic Palaeontology*, **12**, 601–622.
- 1777 Prokop, J., Krzemiński, W., Krzemińska, E., & Wojciechowski, D. (2012) Paoliida, a putative  
1778 stem-group of winged insects: Morphology of new taxa from the Upper Carboniferous of Poland.  
1779 *Acta Palaeontologica Polonica*, **57**, 161–173.
- 1780 Pruvost, P. (1912) Les insectes houillers du Nord de la France. *Annales de la Société Géologique*  
1781 *du Nord*, **41**, 323–380 + pls 9–12.
- 1782 Ragge, D.R. (1955) The wing-venation of the Orthoptera Saltatoria with notes on dictyopteran  
1783 wing-venation British Museum (Natural History), London.
- 1784 Rasnitsyn, A.P. (1976) Grylloblattidy - sovremennye predstaviteli otryada Protoblattod (Insecta,  
1785 Protoblattodea) [Grylloblattidae : modern representatives of order Protoblattodea (Insecta)].  
1786 *Doklady Akademii nauk SSSR*, **228**, 502–504.
- 1787 Rehn, J.W.H. (1951) Classification of the Blattaria as indicated by their wings (Orthoptera).  
1788 *Memoirs of the American Entomological Society*, **14**, 1–134.
- 1789 Ross, E.A. (2000) Contributions to the biosystematics of the insect order Embiidina. Part 1.  
1790 Origin, relationships and integumental anatomy of the insect order Embiidina. *Occasional*  
1791 *papers of the California Academy of Sciences*, **149**, 1–36.

- 1792 Roth, L.M. (1988) Some cavernicolous and epigeal cockroaches with six new species, and a  
1793 discussion of the Nocticolidae (Dictyoptera: Blattaria). *Revue Suisse de Zoologie*, **95**, 297–321.
- 1794 Schneider, J.W. (1977) Zur Variabilität der Flügel paläozoischer Blattodea (Insecta), Teil I.  
1795 *Freiberger Forschungshefte, C*, **326**, 87–105.
- 1796 Schneider, J.W. (1978) Zur Taxonomie und Biostratigraphie der Blattodea (Insecta) des Karbon  
1797 und Perm der DDR. *Freiberger Forschungshefte, C*, **340**, 7–152.
- 1798 Schneider, J.W. (1983) Taxonomie, Biostratigraphie und Palökologie der Blattodea-Fauna aus  
1799 dem Stefan von Commeny (Frankreich) – Versuch einer Revision. *Freiberger Forschungshefte*,  
1800 *C*, **384**, 77–100.
- 1801 Shang, L., Béthoux, O., & Ren, D. (2011) New stem-Phasmatodea from the Middle Jurassic of  
1802 China. *European Journal of Entomology*, **108**, 677–685.
- 1803 Sharov, A.G. (1968) Filogeniya orthopteroidnykh nasekomykh. *Trudy Paleontologicheskogo*  
1804 *instituta, Akademiya Nauk SSSR*, **118**, 1–216.
- 1805 Sharov, A.G. (1971) Phylogeny of the Orthopteroidea Israel Program for Scientific Translations,  
1806 Jerusalem.
- 1807 Shcherbakov, D.E. (2002). Order Forficulida Latreille, 1810. The earwigs and the  
1808 protelytropterans (=Dermaptera DeGeer, 1773 + Protelytroptera Tillyard, 1931). In *History of*  
1809 *Insects* (ed. by A.P. Rasnitsyn & D.L.J. Quicke), pp. 288–291. Kluwer Academic Publishers,  
1810 Dordrecht.
- 1811 Shcherbakov, D.E. (2015) Permian and Triassic ancestors of web-spinners (Embiodea). *Russian*  
1812 *Entomological Journal*, **24**, 189–200.
- 1813 Smart, J. (1956) On the wing venation of *Chaeteessa* and other mantids (Insecta: Mantodea).  
1814 *Proceedings of the Zoological Society of London*, **127**, 545–553.
- 1815 Song, H., Amédégato, C., Cigliano, M.M., Desutter-Grandcolas, L., Heads, S.W., Huang, Y.,  
1816 Otte, D., & Whiting, M.F. (2015) 300 million years of diversification: elucidating the patterns of  
1817 orthopteran evolution based on comprehensive taxon and gene sampling. *Cladistics*, **31**, 621–  
1818 651.
- 1819 Thompson, G.J., Miller, L.R., Lenz, M., & Crozier, R.H. (2000) Phylogenetic analysis and trait  
1820 evolution in Australian lineages of drywood termites (Isoptera, Kalotermitidae). *Molecular*  
1821 *Phylogenetics and Evolution*, **17**, 419–429.
- 1822 Vršanský, P., Vishniakova, V.N., & Rasnitsyn, A.P. (2002). Order Blattida Latreille, 1810. The  
1823 cockroaches (= Blattodea Brunner von Wattenvill, 1882). In *History of Insects* (ed. by A.P.  
1824 Rasnitsyn & D.L.J. Quicke), pp. 263–270. Kluwer Academic Publishers, Dordrecht.

- 1825 Wang, M., Béthoux, O., Bradler, S., Jacques, F.M.B., Cui, Y., & Ren, D. (2014) Under cover at  
1826 pre-angiosperm times: a cloaked phasmatodean insect from the Early Cretaceous Jehol biota.  
1827 *PLoS ONE*, **9**, e91290.
- 1828 Wang, Y.-h., Engel, M.S., Rafael, J.A., Wu, H.-y., Rédei, D., Xie, Q., Wang, G., Liu, X.-g., &  
1829 Bu, W.-j. (2016) Fossil record of stem groups employed in evaluating the chronogram of insects  
1830 (Arthropoda: Hexapoda). *Scientific Reports*, **6**, 38939.
- 1831 Wang, Z., Shi, Y., Qiu, Z., Che, Y., & Lo, N. (2017) Reconstructing the phylogeny of Blattodea:  
1832 robust support for interfamilial relationships and major clades. *Scientific Reports*, **7**, 3903.
- 1833 Ware, J., Grimaldi, D., & Engel, M.S. (2010) The effects of fossil placement and calibration on  
1834 divergence times and rates: An example from the termites (Insecta: Isoptera). *Arthropod*  
1835 *Structure & Development*, **39**, 204–229.
- 1836 Ware, J.L., Litman, J., Klass, K.-D., & Spearman, L.A. (2008) Relationships among the major  
1837 lineages of Dictyoptera: the effect of outgroup selection on dictyopteran tree topology *Systematic*  
1838 *Entomology*, **33**, 429–450.
- 1839 Wei, D., Béthoux, O., Guo, Y., Schneider, J.W., & Ren, D. (2013) New data on the singularly  
1840 rare ‘cockroachoids’ from Xiaheyan (Pennsylvanian; Ningxia, China). *Alcheringa*, **37**, 547–557.
- 1841 Wieland, F. (2008) The genus *Metallyticus* reviewed (Insecta: Mantodea). *Species, Phylogeny &*  
1842 *Evolution*, **1**, 147–170.
- 1843 Wipfler, B., Klug, R., Ge, S.-Q., Bai, M., Göbbels, J., Yang, X.-K., & Hörnschemeyer, T. (2015)  
1844 The thorax of Mantophasmatodea, the morphology of flightlessness, and the evolution of the  
1845 neopteran insects. *Cladistics*, **31**, 50–70.
- 1846 Wolfe, J.A., Daley, A.C., Legg, D.A., & Edgecombe, G.D. (2016) Fossil calibrations for the  
1847 arthropod Tree of Life. *Earth-Science Reviews*, **160**, 43–110.
- 1848 Zheng, Y. & Wiens, J.J. (2015) Do missing data influence the accuracy of divergence-time  
1849 estimation with BEAST? *Molecular Phylogenetics and Evolution*, **85**, 41–49.
- 1850 Zherikhin, V.V. (2002). Order Mantida Latreille, 1802. The mantises (=Mantodea Burmeister,  
1851 1838). In History of Insects (ed. by A.P. Rasnitsyn & D.L.J. Quicke), pp. 273–276. Kluwer  
1852 Academic Publishers, Dordrecht.
- 1853 Zhou, Z., Zhao, L., Liu, N., Guo, H., Guan, B., Di, J., & Shi, F. (2017) Towards a higher-level  
1854 Ensifera phylogeny inferred from mitogenome sequences. *Molecular Phylogenetics and*  
1855 *Evolution*, **108**, 22–33.
- 1856

## 1857 **S2.2 Fossils Excluded as Clade Minimum Age Calibrations**

1858 During our survey of fossil material potentially useful for temporal calibration we  
 1859 considered a number of species which eventually proved unsuitable. Two main causes prompted  
 1860 us to discard them. Firstly, a given species might not fulfill all the criteria listed by Parham et al.  
 1861 (2012). We found that a poorly supported systematic placement (**CR2**) was the most common  
 1862 cause for exclusion. Secondly, a species which systematic placement was well-ascertained yet  
 1863 might be younger than another equally suited for calibrating the same node. Also, a species could  
 1864 be contemporaneous with, or younger than, a fossil suited for calibrating a node that the obtained  
 1865 rooted topology necessitates as being younger. The case of *Osnogerarus trecwithiensis*  
 1866 exemplifies this situation. This 306.9 Ma-old stem-Orthoptera could have been used to calibrate  
 1867 the split between Orthoptera and Dictyoptera + sister-group. However, the stem-Dictyoptera  
 1868 *Qiliniblatia namurensis*, which is also 306.9 Ma-old, indicates that the Orthoptera / Dictyoptera  
 1869 + sister-group split must have occurred earlier. Hence *Osnogerarus trecwithiensis* does not  
 1870 provide useful temporal data.

1871 As discussed prior, several previous contributions already attempted to time-calibrate the  
 1872 phylogenetic tree of Blattodea. We scrutinized the corresponding fossils. Those found to be  
 1873 unsuitable are listed below. In select cases, some fossils irrelevant to our analysis due to  
 1874 incompatible sampling of extant species are nevertheless briefly discussed.

1875 Age indicated for localities are minimum ages and are, in most cases, not discussed in  
 1876 detail (we often relied on Wolfe et al. (2016), or on the original description; and see Section  
 1877 S2.3). Species are listed according to their current species name, alphabetically.

1878

### 1879 *Fossils excluded as calibration points*

#### 1880 *Arvernineura insignis* Piton, 1940

1881 **Preliminary remarks:** As indicated in their tab. 1, the fossil was used as calibration  
 1882 point by Legendre et al. (2015) as stem-Chaeteessidae (hence crown-Mantodea).

1883 **Original description:** Piton, L.E. (1940) Paléontologie du gisement éocène de Menat  
 1884 (Puy-de-Dôme) (flore et faune). *Mémoires de la Société d'Histoire Naturelle d'Auvergne*, **1**, 1–  
 1885 303.

1886 **Further descriptive accounts:** The holotype and two new specimens were (re-)described  
 1887 by Nel and Roy (1996).

1888 **Locality:** Menat (ca. 60 MYA).

1889 **Discussion:** Legendre et al. (2015) justified the placement of as stem-Chaeteessidae  
 1890 based on the character states (1) shape of the forewing pseudo-vein, and (2) most posterior  
 1891 branch of CuA simple. None of these states are demonstrative of affinities with stem-  
 1892 Chaeteessidae, the fossil possibly being a stem-Mantodea (Cui et al., 2018). In details the  
 1893 character state (1) (i) is not a character state *per se*, because the shape was not specified, and (ii)  
 1894 if considered long, it is then a putative plesiomorphy, as it occurs in *Cretophotina tristriata* (see  
 1895 Grimaldi, 2003, fig. 5b, c), regarded as a stem-Mantodea (Grimaldi, 2003). The character state  
 1896 (2) is, for the same reasons, a putative plesiomorphy, but is also absent in the holotype of



1897 *Arvernineura insignis*. In summary, as used by Legendre et al. (2015), this fossil fails to fulfill  
 1898 **CR2** for the intended node.

1899 Note that the species could have then been used as stem-Mantodea. However, because it is  
 1900 more or less contemporaneous with several fossils used as calibration within Blattodea (i.e.  
 1901 fossils that calibrate splits expected to have occurred later than the Mantodea + Blattodea split),  
 1902 it follows that *Arvernineura insignis* is not useful for calibration, given the obtained topology.  
 1903 The same comment applies to all known putative Mesozoic stem-Mantodea (herein, see the case  
 1904 of ‘*Baissomantis maculata*’).

1905

1906 ***Baissatermes lapideus* Engel, Grimaldi & Krishna, 2007**

1907 **Preliminary remarks:** As indicated in their tab. 2, the fossil was used as calibration  
 1908 point by Wang et al. (2017) as member of the crown-group (*Cryptocercus* + Isoptera),  
 1909 presumably as stem-Isoptera.

1910 **Original description:** Engel, M.S., Grimaldi, D. & Krishna, K. (2007) Primitive termites  
 1911 from the Early Cretaceous of Asia (Isoptera). *Stuttgarter Beiträge zur Naturkunde (B)*, **371**, 1–  
 1912 32.

1913 **Further descriptive accounts:** A photograph of the holotype was first published as fig.  
 1914 380 in Belayeva (2002).

1915 **Locality:** Baissa (ca. 70 MYA).

1916 **Discussion:** The age of the corresponding locality was re-assessed and proved to be  
 1917 much younger than previously estimated (see Wolfe et al., 2016, and references therein). As a  
 1918 consequence, *Valditermes brenanae*, instead of *Baissatermes lapideus*, is the earliest stem-  
 1919 Isoptera (as well as *Archeorhinotermes rossi*, suited for calibration of a more recent split; see  
 1920 ‘Section S2.1’).

1921

1922 ***Baissomantis maculata* Gratshev & Zherikhin, 1993**

1923 **Preliminary remarks:** As indicated in their tab. 2, the fossil was used as calibration  
 1924 point by Wang et al. (2017). Based on the position of other fossils selected by these authors,  
 1925 suggesting that the ‘Calibration group’ indicates crown-membership, we assume that ‘mantids’  
 1926 accounts for ‘crown-Mantodea’.

1927 **Original description:** Gratshev, V.G. & Zherikhin, V.V. (1993) New fossil mantids  
 1928 (Insect, Mantida). *Paleontological Journal*, **27**, 148–165.

1929 **Further descriptive accounts:** Grimaldi (2003) provided new drawings (under the name  
 1930 ‘*Baissomantis maculatus*’) of the specimens figured by Gratshev and Zherikhin (1993) and  
 1931 reported new observations.

1932 **Locality:** Baissa (ca. 70 MYA).

1933 **Discussion:** According to Grimaldi (2003) the species lacks the stigma (*sensu* Brannoch  
 1934 et al., 2017), one of the few traits allowing isolated wings of Mantodea to be securely identified.  
 1935 The species was therefore regarded by Grimaldi (2003) as a stem-Mantodea. If used as crown-  
 1936 Mantodea by Wang et al. (2017), this fossil fails to fulfill **CR2** for the intended node. Moreover,

1937 the age of the locality the material was recovered from was reconsidered (see Wolfe et al., 2016  
 1938 and references therein) as much younger than previously assumed (ca. 70 MYA instead of 140  
 1939 MYA).

1940 Note that even if considered 140 Ma-old, if used as stem-Mantodea (as Wang et al., 2017)  
 1941 might have done), the species is more or less contemporaneous with several fossils used as  
 1942 calibration within Blattodea (i.e. fossils that calibrate splits expected to have occurred later than  
 1943 the Mantodea + Blattodea split). It follows that *Baissomantis maculata* is not useful for  
 1944 calibration, given the obtained topology.

1945

1946 ***Balatronis libanensis* Sendi & Azar, 2017**

1947 **Preliminary remarks:** As indicated in their fig. 1 and tab. 1, the fossil was used as  
 1948 calibration point by Bourguignon et al. (2018) as member of crown-group (Blattidae +  
 1949 Tryonicidae), presumably as stem-Blattidae.

1950 **Original description:** Sendi, H. & Azar, D. (2017) New aposematic and presumably  
 1951 repellent bark cockroach from Lebanese amber. *Cretaceous Research*, **72**, 13–17.

1952 **Further descriptive accounts:** None.

1953 **Locality:** Lebanese amber (age uncertain, ca. 130 MYA).

1954 **Discussion:** The fossil genus *Balatronis* was first described based on *Balatronis*  
 1955 *cretacea*, from Burmese Amber (Šmídová & Lei, 2017), and was placed in the family Blattidae  
 1956 based on its pronotal colouration, supposedly similar to that of extant species of *Neostylopyga*. A  
 1957 more ancient putative representative of this genus, namely *Balatronis libanensis*, was used as  
 1958 calibration point by Bourguignon et al. (2018). However, the pronotum is missing in the known  
 1959 material of this species. Instead Sendi and Azar (2017) relied on some states relating to wing  
 1960 venation which are (i) not diagnostic of the genus, (ii) the occurrence of which is not clearly  
 1961 demonstrated in *Balatronis libanensis*, and/or (iii) the occurrence of which is not clearly  
 1962 demonstrated in *Balatronis cretacea*. Instead of a stem-Blattidae, *Balatronis libanensis* is likely a  
 1963 member of a stem-Blattodea or stem-Dictyoptera clade due to the presence of a central ocellus  
 1964 (not seen in any extant cockroaches).

1965 Given the above, and because the age of Lebanese amber is poorly constrained, we  
 1966 refrained from using this species as calibration point in our analysis. In summary, as used by  
 1967 Bourguignon et al. (2018), the fossil fails to fulfill **CR2** for the intended node, and is not an ideal  
 1968 case regarding **CR4** and **CR5**.

1969 Note that the above reasoning leads one to wonder about the validity of the other species  
 1970 of *Balatronis*. It is also problematic as a fossil used for calibration. The pronotal colouration,  
 1971 while indeed comparable to the recent species of *Neostylopyga*, is also similar to a variety of  
 1972 unrelated extant cockroach species (e.g., *Epilampra azteca*, *Allacta* spp., *Euthlastoblatta* spp.).  
 1973 None of the other character states displayed by the known material indicate affinities with  
 1974 Blattidae, and the fact that the body size is so small makes this placement even more unlikely. In  
 1975 short, there is no known member of the genus *Balatronis* that can be used as a calibration for a  
 1976 dated analysis of the cockroach phylogeny.

1977 ***Cariblattoides labandeirai* Vršanský, Vidlička, Čiampor Jr. & Marsh, 2012**

1978 **Preliminary remarks:** This fossil specimen was suggested to calibrate the node  
 1979 *Cariblattoidea* + *Cariblattoidea* by Evangelista et al. (2017). Given our taxon sampling, this would  
 1980 correspond to a placement as stem-*Cariblattoidea* (hence crown-Pseudophyllodromiinae) and  
 1981 calibrate the node of *Cariblattoidea* + remaining Pseudophyllodromiinae.

1982 **Original description:** Vršanský, P., Vidlička, L., Čiampor, F. Jr & Marsh, F. (2012)  
 1983 Derived, still living cockroach genus *Cariblattoidea* (Blattida: Blattellidae) from the Eocene  
 1984 sediments of Green River in Colorado, USA. *Insect Science*, **19**, 143–152.

1985 **Further descriptive accounts:** None.

1986 **Locality:** Green River (48.1 MYA).

1987 **Discussion:** Evangelista et al. (2017) referred to the original description for the  
 1988 phylogenetic justification of the fossil. However, the provided evidence is inconclusive when  
 1989 subjected to detailed examination. Character states supporting the phylogenetic placement  
 1990 (namely, cup-like palpi, and hindwing radius simple) are not restricted to the genus  
 1991 *Cariblattoidea*, or to the Pseudophyllodromiinae. The colour pattern of the pronotum may be  
 1992 distinctive. However, no systematic treatment of this character has been performed and similar  
 1993 pronotal patterns (at least superficially) occur in geographically disjoint Blattodea of various  
 1994 taxonomic affiliations (Rentz, 2012). In summary, as proposed by Evangelista et al. (2017) this  
 1995 fossil fails to fulfill **CR2** for the intended node.

1996

1997 ***Cratokalotermes santanensis* Bechly, 2007**

1998 **Preliminary remarks:** As indicated in their fig. 1 and tab. 1, the fossil was used as  
 1999 calibration point by Bourguignon et al. (2018) as member of the crown-group (Kalotermitidae +  
 2000 Neoisoptera *sensu* Engel et al. (2009), presumably as stem-Kalotermitidae. Note that Legendre  
 2001 et al. (2015) also used this fossil and assumed the same placement.

2002 **Original description:** Bechly, G. (2007) Isoptera: termites. *The Crato fossil beds of*  
 2003 *Brazil* (ed. by D.M. Martill, G. Bechly and R.F. Loveridge), pp. 249–262. Cambridge University  
 2004 Press, Cambridge, UK.

2005 **Further descriptive accounts:** Grimaldi et al. (2008).

2006 **Locality:** Crato (112.6 MYA).

2007 **Discussion:** The rationale underlying the placement of this fossil according to  
 2008 Bourguignon et al. (2018) and Legendre et al. (2015) is unclear. Although Bechly (2007)  
 2009 considered the species a Kalotermitidae, Grimaldi et al. (2008) (referred to by Bourguignon et  
 2010 al., 2018), who carried out a re-description of the species, suggested putative relationships with  
 2011 Kalotermitidae. However, Grimaldi *et al.* (2008) also posit that the evidence is indecisive and  
 2012 that it could equally be stem to a larger group. Furthermore, Engel et al. (2009), in their broad  
 2013 scale phylogenetic analysis, retrieved this fossil as a remote stem-relative of Kalotermitidae +  
 2014 Neoisoptera *sensu* (Engel et al., 2009). In summary, as used by Bourguignon et al. (2018) and  
 2015 Legendre et al. (2015), the fossil fails to fulfill **CR2** for the intended node.

2016

2017 ***Cratomastotermes wolfschweningeri* Bechly, 2007**

2018 **Preliminary remarks:** As indicated in their tab. 2, the fossil was used as calibration  
 2019 point by Wang et al. (2017) as member of crown-Isoptera, presumably as a stem-  
 2020 Mastotermitidae.

2021 **Original description:** Bechly, G. (2007) Isoptera: termites. *The Crato fossil beds of*  
 2022 *Brazil* (ed. by D.M. Martill, G. Bechly and R.F. Loveridge), pp. 249–262. Cambridge University  
 2023 Press, Cambridge, UK.

2024 **Further descriptive accounts:** Grimaldi et al. (2008).

2025 **Locality:** Crato (112.6 MYA).

2026 **Discussion:** For this particular fossil Wang et al. (2017) provided no reference regarding  
 2027 its systematic placement. In this case our ‘Preliminary remarks’ preceding the case of  
 2028 *Archeorhinotermes rossi* (see ‘Section S2.1’) apply: the position of the fossil is not firmly  
 2029 established. As used by Wang et al. (2017), this fossil fails to fulfill **CR2** for the intended node.

2030

2031 ***Coptotermes sucineus* Emerson, 1971**

2032 **Preliminary remarks:** As indicated in their fig. 1 and tab. 1, the fossil was used as  
 2033 calibration point by Bourguignon et al. (2018) as member of the crown-group (*Coptotermes* +  
 2034 *Heterotermes*), presumably as member of the genus *Coptotermes*.

2035 **Original description:** Emerson, A.E. (1971) Tertiary fossil species of the  
 2036 Rhinotermitidae (Isoptera), phylogeny of genera, and reciprocal phylogeny of associated  
 2037 Flagellata (Protozoa) and the Staphylinidae (Coleoptera). *Bulletin of the American Museum of*  
 2038 *Natural History*, **146**, 243–304.

2039 **Further descriptive accounts:** None.

2040 **Locality:** Chiapas amber (age uncertain, Early Miocene).

2041 **Discussion:** Emerson (1971) placed this species in the genus *Coptotermes*, which he  
 2042 regarded as defined by a large number of character states (p. 265). However, their polarity was  
 2043 not formally tested. *Coptotermes priscus*, possibly contemporaneous (Dominican amber; age  
 2044 uncertain, Early Miocene), was retrieved as sister-group to an extant species of *Coptotermes* by  
 2045 Engel et al. (2009), essentially based on a character state of the soldier, a caste unknown for  
 2046 *Coptotermes sucineus*. The character state ‘wing membrane setae present, microsetulose’,  
 2047 described by Emerson (1971) was recovered as a homoplastic support to the assignment of the  
 2048 fossil to the genus *Coptotermes* by Engel et al. (2009).

2049 Given the above, and because the age of Chiapas amber is poorly constrained, we refrained  
 2050 from using this species as calibration point in our analysis. In summary, as used by Bourguignon  
 2051 et al. (2018), the fossil fails to fulfill our strict understanding for **CR2** (see rationale in Section  
 2052 2.1) for the intended node, and is not an ideal case regarding **CR4** and **CR5**.

2053

2054 ***Diploptera* spp.**

2055 **Preliminary remarks:** As indicated in their fig. 1 and tab. 1, unspecified species  
 2056 assigned to the genus *Diploptera* was/were used by as calibration point by Bourguignon et al.

2057 (2018) as member of the crown-group *Diploptera* + Oxyhaloinae, presumably as member of the  
 2058 genus *Diploptera*.

2059 **Original description:** Vršanský, P., Šmídová, L., Valáška, D., Barna, P., Vidlička, L.,  
 2060 Takáč, P., Pavlik, L., Kúdelová, T., Karim, T.S., Zelagin, D. & Smith, D. (2016) Origin of  
 2061 origami cockroach reveals long-lasting (11 MYA) phenotype instability following viviparity.  
 2062 *Science of Nature*, **103**, 78.

2063 **Further descriptive accounts:** None.

2064 **Locality:** Green River (ca. 48.1 MYA).

2065 **Discussion:** As discussed in Evangelista et al. (2017), there is no definitive evidence for  
 2066 the placement of the corresponding species. Diagnostic features listed by Vrsansky et al. (2016)  
 2067 are not unique to *Diploptera*; indeed, they can be found in a variety of other Blaberoidea, and  
 2068 possibly Corydiidae *sensu stricto*. Regarding the age of the corresponding locality, Bourguignon  
 2069 et al. (2018) selected the lower boundary for the Eocene, viz. 56.0 Ma. However, the insect-  
 2070 bearing strata are younger, with an upper boundary (i.e. minimum age) at 48.1 MYA  
 2071 (Evangelista et al., 2017). In summary, as used by Bourguignon et al. (2018) the fossil fails to  
 2072 fulfill **CR2**, **CR4** and **CR5** for the intended node.

2073

2074 ***Gulou carpenteri* Béthoux, Cui, Kondratieff, Stark & Ren, 2011**

2075 **Preliminary remarks:** As indicated in their tab. 1, the fossil was used as calibration  
 2076 point by Legendre et al. (2015) as stem-Plecoptera.

2077 **Original description:** Béthoux, O., Cui, Y., Kondratieff, B., Stark, B. & Ren, D. (2011)  
 2078 At last, a Pennsylvanian stem-stonefly (Plecoptera) discovered. *BMC Evolutionary Biology*, **11**,  
 2079 248.

2080 **Further descriptive accounts:** None.

2081 **Locality:** Xiaheyan (306.9 MYA).

2082 **Discussion:** The placement of *Gulou carpenteri* as stem-Plecoptera by Béthoux et al.  
 2083 (2011a); essentially followed by (Legendre et al., 2015) was based on the character states (1) in  
 2084 forewing, broad M/MP-CuA and CuA-CuP areas, (2) in both wing pairs, occurrence of a strong  
 2085 cross-vein connecting M and CuA just distal of the origin of the latter ('arculus'), and (3) in both  
 2086 wing pairs, ScP reaching RA.

2087 The state (1) is generally present in extant Plecoptera but with exceptions. For example,  
 2088 the M/MP-CuA and CuA-CuP areas are not distinctly broader than the R/RP-M area in  
 2089 Austroperlidae (Béthoux, 2005a; Tillyard, 1923); the CuA-CuP area is not distinctly broader than  
 2090 the R/RP-M area in Eustheniidae (Béthoux, 2005a; Tillyard, 1923); the M/MP-CuA area is not  
 2091 distinctly broad in Griptopterygidae, Pteronarcyidae, and Taeniopterygidae (Béthoux, 2005a;  
 2092 among many other contributions); etc. Note that Legendre et al. (2015) considered the state with  
 2093 some reformulation 'presence of a broad MP/CuA and CuA/CuP areas in forewings, with a  
 2094 series of parallel simple crossveins' as relevant. We believe the type of cross-venation should be  
 2095 considered a distinct character. As a matter of fact, a series of parallel simple cross-veins in the  
 2096 areas between MP and CuP occur in many insect groups.



2097 The state (2) is unique among Polyneoptera (an arculus is present in hind wings of  
 2098 Blattodea and Mantodea, but not in forewings), but likely occurs in Paraneoptera. This would  
 2099 lead us to reconsider the homologies proposed for the latter group by Nel et al. (2012), which is  
 2100 largely out of the scope of the current account. Moreover, under the M<sub>5</sub> insect wing venation  
 2101 paradigm, the arculus is the free part of M<sub>5</sub>, and this condition exhibited by Plecoptera and *Gulou*  
 2102 *carpenteri* is then to be regarded as a plesiomorphy within Pterygota.

2103 The character state (3) is not unique to Plecoptera. It is also documented in fossils  
 2104 contemporaneous to *Gulou carpenteri* and regarded as stem-Orthoptera by some (Béthoux,  
 2105 2005b, 2008b; Du et al., 2017; among others), in Psocodea (Carpenter, 1992), and several  
 2106 lineages of some Neuroptera such as Polystoechotidae, Osmylidae, and Myrmeleontidae (among  
 2107 others; (New, 1983; Tillyard, 1916; Winterton & Makarkin, 2010); among many others).

2108 Note that Aristov (2014) places *Gulou carpenteri* in the order Cnemidolestodea, within a  
 2109 super-order ‘Perlidea’, itself including Plecoptera/Perlida, Dermaptera/Forficulida,  
 2110 Embioptera/Embiida and Grylloblattodea/Grylloblattida. However, the rationale for this  
 2111 placement is not obvious. Note that the clade ‘Perlidea’ is not recovered by our analysis.

2112 In summary, the identification of *Gulou carpenteri* as a stem-Plecoptera, although likely, is  
 2113 not based on an autapomorphic character state (see selection rational in Section S2.1). Finally,  
 2114 because *Gulou carpenteri* is contemporaneous to *Qilianiblatia namurensis*, and because the latter  
 2115 calibrates a split expected to have occurred later than the Plecoptera + sister-group split, it  
 2116 follows that *Gulou carpenteri* is not useful for calibration, given the obtained topology (this  
 2117 applies to the case of *Palaeotaeniopteryx elegans*, see herein).

2118

### 2119 ***Homocladus grandis* Carpenter, 1966**

2120 **Preliminary remarks:** As indicated in their tab. 1, the fossil was used as calibration  
 2121 point by Bourguignon et al. (2018), in some of their analyses, as member of crown-Dictyoptera,  
 2122 presumably as stem-Mantodea.

2123 **Original description:** Carpenter, F.M. (1966) The Lower Permian insects of Kansas.  
 2124 Part 11: The orders Protorthoptera and Orthoptera. *Psyche*, **73**, 46–88.

2125 **Further descriptive accounts:** New photographs and drawings of material of  
 2126 *Homocladus grandis* were reproduced in Béthoux et al. (2010). Specimens of other species from  
 2127 the same fossil family (viz. the Strepocladidae, itself considered a junior synonym of  
 2128 Anthracoptilidae by some) were documented in Béthoux and Wieland (2009), Guan et al. (2016)  
 2129 and Kukulová-Peck and Beutel (2012), among recent contributions.

2130 **Locality:** Elmo (271.8 MYA).

2131 **Discussion:** As discussed by Bourguignon et al. (2018), the systematic placement of this  
 2132 species, and of other Strepocladidae (including representatives more ancient than *Homocladus*  
 2133 *grandis*), has been debated. Based on particular conjectures of homologies for the forewing  
 2134 venation of Mantodea Béthoux and Wieland (2009) suggested that Strepocladidae were stem-  
 2135 Mantodea. This proposal was challenged by many (Gorochoy, 2013; Guan et al., 2016;  
 2136 Kukulová-Peck & Beutel, 2012; Legendre et al., 2015). Indeed, Béthoux and Wieland (2009)’s



2137 interpretation is herein discarded: members of this family possess, in the forewing, distinct stems  
 2138 of RA and RP, and therefore lack one of the distinctive apomorphy of crown-Dictyoptera  
 2139 (namely, a pectinate fusion of RA onto RP; see ‘Section S2.1’, case of *Qilianiblatta namurensis*).  
 2140 Strephocladidae (or, Anthracoptilidae) could be stem-Dictyoptera (Legendre et al., 2015, and  
 2141 references therein). In summary, as used by Bourguignon et al. (2018), the fossil fails to fulfill  
 2142 **CR2** for the intended node.

2143

#### 2144 *Ischnoptera gedanensis* (Germar & Berendt, 1856)

2145 **Preliminary remarks:** As indicated in their fig. 1 and tab. 1, the fossil was used as  
 2146 calibration point by Bourguignon et al. (2018) as member of the crown-group (*Ischnoptera* +  
 2147 *Carbruneria* + *Beybienkoa*), presumably as member of the genus *Ischnoptera*.

2148 **Original description:** Germar, E.F. & Berendt, G.C. (1856) Die im Berstein  
 2149 befindlichen Hemipteren und Orthopteren der Vorwelt. *Die im Berstein befindlichen*  
 2150 *organischen Reste der Vorwelt, Zweiter Band* (ed. by G.C. Berendt), pp. 1–40, pl. 4.  
 2151 Gerbardschen Officin, Berlin, Germany.

2152 **Further descriptive accounts:** Berendt (1836) first described material of this species,  
 2153 including a figure (pl. 16, fig. 6). Shelford (1910) provided a re-description based on additional  
 2154 material.

2155 **Locality:** Baltic amber (age uncertain, Eocene).

2156 **Discussion:** Roth (2002) proposed the character states (1) front leg spination type B<sub>2</sub> or  
 2157 B<sub>3</sub> and (2) sulci in pronotum as diagnostic of *Ischnoptera*. However, both states can be regarded  
 2158 as diagnostic only in the context of Neotropical Blattellinae, as both are homoplastic in  
 2159 Blattodea. Given that extant species of *Ischnoptera* are restricted to the New World, and that the  
 2160 fossil is from the Old World Baltic region, the assignment appears dubious. Moreover, the  
 2161 available descriptive data is insufficient to assess the occurrence of the diagnostic states in the  
 2162 fossil species.

2163 Given the above, and because the age of Baltic amber is poorly constrained, we refrained  
 2164 from using this species as calibration point in our analysis. In summary, as used by Bourguignon  
 2165 et al. (2018), the fossil fails to fulfill **CR2** for the intended node, and is not an ideal case  
 2166 regarding **CR4** and **CR5**.

2167

#### 2168 *Mastotermes nepropadyom* Vršanský & Aristov, 2014

2169 **Preliminary remarks:** As indicated in their tab. 1, the fossil was used as calibration  
 2170 point by Legendre et al. (2015) as member of stem-Mastotermitidae.

2171 **Original description:** Vršanský, P. & Aristov, D.S. (2014) Termites (Isoptera) from the  
 2172 Jurassic/Cretaceous boundary: Evidence for the longevity of their earliest genera. *European*  
 2173 *Journal of Entomology*, **111**, 137–141.

2174 **Further descriptive accounts:** None.

2175 **Locality:** Chernovskie Kopi (ca. 70 MYA).

2176 **Discussion:** Legendre et al. (2015) relied on the character state ‘hindwing with  
 2177 *Mastotermes*-like anal field’ to assigned this species to the extant family *Mastotermes*. However,  
 2178 this state is a plesiomorphy within crown-Dictyoptera. In other words, the species could be a  
 2179 stem-Isoptera, a stem-Mastotermitidae or a stem-Euisoptera. The most conservative option is to  
 2180 consider it a stem-Isoptera.

2181 The age of the locality the material was recovered from was reconsidered as much  
 2182 younger than previously assumed (ca. 70 MYA instead of 140 Ma; see (Wolfe et al., 2016) and  
 2183 references therein). As a consequence, *Mastotermes nepropadyom* is not suited as stem-Isoptera,  
 2184 given that the stem-Isoptera *Valditermes brenanae* is more ancient (see ‘Section S2.1’). In  
 2185 summary, as used by Legendre et al. (2015), the fossil fails to fulfill **CR2** and **CR5** for the  
 2186 intended node.

2187

### 2188 *Mastotermes sarthensis* Schlüter, 1989

2189 **Preliminary remarks:** As indicated in their tab. 2, an undetermined species of  
 2190 *Mastotermes* described by Schlüter (1978) was used as calibration point by Wang et al. (2017) as  
 2191 member of crown-Isoptera, presumably as stem-Euisoptera *sensu* Engel et al. (2009). The  
 2192 corresponding specimen was assigned to a species on its own, namely *Mastotermes sarthensis*,  
 2193 by Schlüter (1989).

2194 **Original description:** Schlüter, T. (1989) Neue Daten über harzkonservierte  
 2195 Arthropoden aus dem Cenomanium NW-Frankreichs. *Documenta Naturae*, **56**, 59–70.

2196 **Further descriptive accounts:** The holotype and only know specimen has been  
 2197 described by Schlüter prior to his 1989 account (see references therein), including Schlüter  
 2198 (1978), referred to by Wang et al. (2017).

2199 **Locality:** Bezonnais (age uncertain, ca. 94 MYA)

2200 **Discussion:** The rationale adopted by Wang et al. (2017) to use this fossil to calibrate the  
 2201 group ‘termites excluding *Mastotermes*’ is not evident given that it has been consistently  
 2202 assigned to *Mastotermes* (see original description, references therein, and Engel et al., 2007a;  
 2203 Nel & Paicheler, 1993) or regarded as *incertae sedis* (Wappler & Engel, 2006). The available  
 2204 data suggests that the species possessed an expanded plicatum in the hind wing, which is a  
 2205 plesiomorphy within Dictyoptera. In other words, the species could be a stem-Isoptera, a stem-  
 2206 Mastotermitidae or a stem-Euisoptera. The most conservative option is to consider it a stem-  
 2207 Isoptera. Given that it is more recent than the stem-Isoptera *Valditermes brenanae* (see ‘Section  
 2208 S2.1’), it follows that *Mastotermes sarthensis* is not useful as calibration point. In summary, as  
 2209 used by Wang et al. (2017), the fossil fails to fulfill **CR2** for the intended node.

2210

### 2211 *Miroblattites costalis* (Laurentiaux-Vieira & Laurentiaux, 1987)

2212 **Preliminary remarks:** Owing to its age, the species was putatively useful as stem-  
 2213 Dictyoptera.

2214 **Original description:** Laurentiaux-Vieira, F. & Laurentiaux, D. (1987) Un remarquable  
 2215 Archimylacride du Westphalien inférieur belge. Ancienneté du dimorphisme sexuel des Blattes.  
 2216 *Annales de la Société Géologique du Nord*, **106**, 37–47.

2217 **Further descriptive accounts:** Photographs of both sides of the specimen were first  
 2218 reproduced on pl. 29 in Laurentiaux (1958). A new drawing and photograph of the holotype was  
 2219 published as fig. 5 in Béthoux et al. (2011b); species erroneously referred to as ‘*Miroblatta*  
 2220 *costalis*’); a photograph of the holotype was published as fig. 4A in Prokop et al. (2014a).

2221 **Locality:** Charbonnages de Rieu-du-Coeur (ca. 314 MYA).

2222 **Discussion:** The putative placement of *Miroblatta costalis* as stem-Dictyoptera is based  
 2223 on the character state ‘pronotum expanded anteriorly and laterally’. This state was listed by  
 2224 Rasnitsyn (2002) and Grimaldi (2005) as synapomorphic of (total-)Dictyoptera (termed  
 2225 ‘Blattidea’ in the former). This option then assumes a loss in Mantodea. In the absence of stem-  
 2226 Mantodea possessing a large pronotum, this proposal can be considered speculative, yet not  
 2227 unrealistic, given that Isoptera had to have experienced such a loss, as well as some Mesozoic  
 2228 stem- or crown-Blattodea (Grimaldi, 2005). The occurrence of the character state could be  
 2229 conservatively considered as indicative of a stem-Dictyoptera.

2230 However at least some of the ‘Protorthoptera-Protoblattodea-Paraplecoptera’, regarded  
 2231 by some as relatives of Grylloblattodea, possess a laterally expanded pronotum. This is at least  
 2232 the case of *Euryptilon blattoides* (Martynov, 1940) (Euryptilonidae; see original description and  
 2233 Sharov (1962, 1991), and of some Epideigmatidae (Béthoux, 2007b) and Geinitziidae (Cui et al.,  
 2234 2012; Huang & Nel, 2008). According to Storozhenko (2002) the absence of ‘pronotal paranota’  
 2235 (a formulation also including lateral lobes provided with vein-like reticulations) is diagnostic of a  
 2236 taxon within the ‘Protorthoptera-Protoblattodea-Paraplecoptera’, implying that a laterally  
 2237 expanded pronotum occurs widely in the group. These data suggest that the character state  
 2238 cannot be considered a definitive indication of Dictyopteran affinities.

2239 In summary the species was not considered because it fails to fulfill **CR2**.

2240

### 2241 *Morphna paleo* Vršanský, Vidlička, Barna, Bugdaeva & Markevich, 2013

2242 **Preliminary remarks** As indicated in their tab. 1, the fossil was used as calibration point  
 2243 by Legendre et al. (2015) as member of stem-“Asian” Epilamprinae.

2244 **Original description:** Vršanský, P., Vidlička, L., Barna, P., Bugdaeva, E. & Markevich,  
 2245 V. (2013) Paleocene origin of the cockroach families Blaberidae and Corydiidae: evidence from  
 2246 Amur River region of Russia. *Zootaxa*, **3635**, 117-126.

2247 **Further descriptive accounts:** None.

2248 **Locality:** Archara-Boguchan (61.6 MYA).

2249 **Discussion:** Evangelista et al. (2017) discussed the weaknesses of the morphological  
 2250 character justification for this fossil’s phylogenetic placement. Regardless, we herein consider  
 2251 this fossil as of equal age to “*Gyna*” *obesa*. Then, given our taxon sampling, at best we could  
 2252 only consider *Morphna paleo* as stem-Blaberidae (or a crown group Blaberidae whose

2253 relationship to the Blaberidae we include is unknown). Given this, as a calibration point, this  
 2254 fossil would be redundant with “*Gyna*” *obesa*.

2255

2256 ***Mylacris anthracophila* Scudder, 1868**

2257 **Preliminary remarks:** As indicated in their fig. 1 and tab. 1, the fossil was used as  
 2258 calibration point by Bourguignon et al. (2018), in some of their analyses, as member of the  
 2259 crown-group (Dictyoptera + Phasmatodea + Grylloblattodea + Mantophasmatodea), presumably  
 2260 as stem-Dictyoptera.

2261 **Original description:** Scudder, S.H. (1868) Description of fossil insects found on Mazon  
 2262 Creek, and near Morris, Grundy co., Ill. *Geological Survey of Illinois. Volume III. Geology and*  
 2263 *Palaeontology. Palaeontology* (ed. by M.F. B. and A.H. Worthen), pp. 566-572. Schmidt, L. W.,  
 2264 New York.

2265 **Further descriptive accounts:** A drawing of one of the syntypes of the species (the  
 2266 forewing) was reproduced as fig. 1 in Durden (1969).

2267 **Locality:** Mazon Creek (306.9 MYA).

2268 **Discussion:** Neither apomorphy nor phylogenetic analysis was referred to by  
 2269 Bourguignon et al. (2018) in support of the systematic assignment of the species. These authors  
 2270 possibly followed Tong et al. (2015) who selected ‘late Carboniferous roachoid fossils (from  
 2271 ~315 MYA)’ for temporal calibration. These authors referred to Labandeira (1994) and Garwood  
 2272 and Sutton (2010). In the former, which is a compendium of fossil insect families (and therefore  
 2273 relies on earlier, systematics-orientated accounts) the Mylacridae, among other ‘Carboniferous  
 2274 roachoid families’ are considered members of the order Blattodea. This is not the option  
 2275 followed by Tong et al. (2015) nor Bourguignon et al. (2018), who regard *Mylacris*  
 2276 *anthracophila* as a stem-Dictyoptera. Garwood and Sutton (2010), who focused on a re-  
 2277 description of the Late Carboniferous *Aphthoroblattina eggintoni*, did not reveal any character  
 2278 state allowing to place the species either as a stem-Blattodea or a stem-Dictyoptera. Our own  
 2279 analysis, however, suggests that Bourguignon et al. (2018)’s use of this fossil is indeed  
 2280 appropriate: according to Durden (1969) *Mylacris anthracophila* possessed a pectinate fusion of  
 2281 RA onto RP, herein regarded as indicative of a stem-Dictyoptera indeed (see ‘Section S2.1’).

2282 Bourguignon et al. (2018) as well as Tong et al. (2015) applied an age of 315 MYA for  
 2283 this fossil. However, the minimum age for the corresponding locality, namely Mazon Creek, is  
 2284 306.9 MYA (Wolfe et al., 2016). The contemporaneous *Qilianiblattha namurensis*, selected  
 2285 herein (see ‘Section S2.1’), is then equally suitable.

2286

2287 ***Nanotermes isaacae* Engel & Grimaldi in Engel, Grimaldi, Nascimbene & Singh, 2011**

2288 **Preliminary remarks:** As indicated in their fig. 1 and tab. 1, an unspecified species of  
 2289 *Nanotermes* was used as calibration point by Bourguignon et al. (2018) as member of the crown-  
 2290 group (Termitidae + *Coptotermes* + *Heterotermes* + *Reticulitermes*), presumably as stem-  
 2291 Termitidae. To our knowledge, the only known species of this genus is *Nanotermes isaacae*.

2292           **Original description:** Engel, M.S., Grimaldi, D., Nascimbene, P.C. & Singh, H. (2011)  
 2293 The termites of Early Eocene Cambay amber, with the earliest record of the Termitidae  
 2294 (Isoptera). *Zookeys*, **148**, 105–123.

2295           **Further descriptive accounts:** None.

2296           **Locality:** Cambay amber (age uncertain, Early Eocene).

2297           **Discussion:** The original description does not provide supporting evidence for the  
 2298 placement in Termitidae. Unambiguous character states retrieved by Engel et al. (2009) as  
 2299 supporting the monophyly of Termitidae and Termitidae *nec Macrotermes* are either not  
 2300 applicable or not documented in *Nanotermes isaacae*. Engel et al. (2011) discuss how the  
 2301 comparatively poor preservation of the available material preclude a positive assignment at the  
 2302 sub-familial level.

2303           Given the above, and because the age of Cambay amber is poorly constrained, we  
 2304 refrained from using this species as calibration point in our analysis. In summary, as used by  
 2305 Bourguignon et al. (2018), the fossil fails to fulfill **CR2** for the intended node, and is not an ideal  
 2306 case regarding **CR4** and **CR5**.

2307           Note that our sample of extant species would make this fossil suitable to date the node we  
 2308 calibrated using *Archeorhinotermes rossi*, which is older than *Nanotermes isaacae* by ca. 50  
 2309 MYA (see ‘Section S2.1’).

2310

2311 ***Oedischia williamsoni* Brongniart, 1885**

2312           **Preliminary remarks:** The species was putatively useful as stem-Orthoptera.

2313           **Original description:** Brongniart, C. (1885) Les insectes fossiles des terrains primaires.  
 2314 Coup d'oeil rapide sur la faune entomologique des terrains paléozoïques. *Bulletin de la Société*  
 2315 *des Amis des Sciences naturelles de Rouen*, **1885**, 50-68.

2316           **Further descriptive accounts:** The holotype was further documented in Brongniart  
 2317 (1893). A new photograph of the holotype was published as fig. 94 in Carpenter (1992),  
 2318 complemented by a new drawing (fig. 95.4a), largely similar to that published as text-fig. 15 in  
 2319 Carpenter (1966).

2320           **Locality:** Commentry (298.8 MYA).

2321           **Discussion:** The placement of *Oedischia williamsoni* as a putative stem-Orthoptera is  
 2322 based on the following character states:

2323           Ultimate level:

2324           Class 1: (1) in forewing, large area between the anterior wing margin and ScA (‘precostal  
 2325 area’).

2326           Class 2: (2) CuPa forked (into CuPa $\alpha$  and CuPa $\beta$ ) just basal of the fusion of its anterior  
 2327 branch (CuPa $\alpha$ ) with CuA; (3) base of hind femur broad.

2328           Contextual level:

2329           Class 1: none further considered.

2330           Class 2: none further considered.



2331 The holotype of *O. williamsoni* is remarkable because it represents the earliest occurrence  
 2332 of jumping hind leg, diagnostic of (but not unique to) Orthoptera (or, Saltatoria), in association  
 2333 with wing venation character states unique to total-Orthoptera (see section on *Osnogerarus*  
 2334 *trecwithiensis*). The identification of this species as a stem-Orthoptera is hardly disputable.  
 2335 Indeed, it has been widely accepted [(Brongniart, 1885; Carpenter, 1992; Gorochov & Rasnitsyn,  
 2336 2002; Grimaldi, 2005; Hennig, 1981; Kukalová-Peck, 1991; Sharov, 1968; Zeuner, 1939);  
 2337 among others; see Kluge (2016) for alternative wording of character state (3)] and, to our  
 2338 knowledge, never been challenged.

2339 The current location of the material of this species is unknown (i.e. **CR1** is not fulfilled).  
 2340 However, there is no doubt that the holotype existed. In addition to XIX<sup>th</sup> century accounts,  
 2341 Carpenter (1966) reported that he made direct observations during his visits at the Muséum  
 2342 National d'Histoire Naturelle (Paris) during the decade preceding his publication. The Museum  
 2343 of Comparative Zoology (Harvard) houses the original negative of the photograph he took of the  
 2344 holotype (OB, pers. obs., 2002); and the Muséum National d'Histoire Naturelle houses the  
 2345 original photographic glass plate of the photograph reproduced in Brongniart (1885, 1893), a  
 2346 scan of which will be made available on request (O. Béthoux). The available data leaves no  
 2347 doubts on the occurrence of the relevant character states.

2348 However, the species was not selected because, as stem-Orthoptera, it represents a younger  
 2349 occurrence compared to *Osnogerarus trecwithiensis* (which, itself, was not selected for similar  
 2350 reasons; see the corresponding case, herein).

2351

2352 ***Osnogerarus trecwithiensis* Kukalová-Peck & Brauckmann, 1992**

2353 **Preliminary remarks:** The species was putatively useful as stem-Orthoptera. The  
 2354 identification of a number of Carboniferous species as stem-Orthoptera, such as *Miamia* spp. and  
 2355 the Cnemidolestodea, is debated. While one school (e.g., Béthoux, 2005b; Béthoux & Nel, 2002,  
 2356 2005; Prokop et al., 2014b) identifies them as stem-Orthoptera, another (e.g., Aristov, 2012;  
 2357 Rasnitsyn, 2002) considers them as stem representatives of various Polyneopteran lineages, or  
 2358 stem-Polyneoptera. The grounds for discrepancies essentially lay in the favoured insect wing  
 2359 venation groundplan, a topic addressed elsewhere (Béthoux, 2008a) but which can still be  
 2360 considered unsettled. Yet, both schools concur on the identification of a subset of these species  
 2361 as genuine stem-Orthoptera, including the one discussed below.

2362 **Original description:** Kukalová-Peck, J. & Brauckmann, C. (1992) Most Paleozoic  
 2363 Protorthoptera are ancestral hemipteroids: major wing braces as clues to a new phylogeny of  
 2364 Neoptera (Insecta). *Canadian Journal of Zoology*, **70**, 2452–2473.

2365 **Further descriptive accounts:** A photograph of a portion of the forewing of a cast of the  
 2366 holotype was reproduced as fig. 12 in Béthoux and Nel (2002); a drawing of the same cast, done  
 2367 by O. Béthoux, was reproduced as fig. 3 by Brauckmann and Herd (2006).

2368 **Locality:** Piesberg quarry (306.9 MYA).

2369 **Discussion:** The placement of *Osnogerarus trecwithiensis* as a putative stem-Orthoptera  
 2370 is based on the following character states:



2371 Ultimate level:

2372 Class 1: (1) in forewing, large area between the anterior wing margin and ScA ('precostal  
2373 area').

2374 Class 2: (2) CuPa forked (into CuPa $\alpha$  and CuPa $\beta$ ) just basal of the fusion of its anterior  
2375 branch (CuPa $\alpha$ ) with CuA.

2376 Contextual level:

2377 Class 1: none found / considered.

2378 Class 2: none found / considered.

2379 The species was assigned to the Geraridae, a family which has been the focus of much  
2380 debate. As a preliminary remark, the Paraneopteran affinities defended by Kukalová-Peck and  
2381 Brauckmann (1992) can be readily excluded: they were proved to rely on artefacts of preparation  
2382 (Béthoux & Briggs, 2008). Other accounts generally regarded the corresponding species as stem-  
2383 Orthoptera. according to Sharov (1968), who restricted the Protorthoptera to this single family  
2384 (he termed Sthenaropodidae), the corresponding species are stem-Orthoptera (inclusive of the  
2385 'Titanopterids', he regarded as deriving from stem-Caelifera); Gorochov (2001) regarded the  
2386 Geraridae as putatively sister-group related with 'Titanopterids', the common clade representing  
2387 stem-Orthoptera; on 'Titanopterids', see Béthoux (2007a). Note that Carpenter (1992) placed the  
2388 family within his Protorthoptera, equivalent to 'stem-Polyneoptera & stems to some of the main  
2389 Polyneopteran lineages'.

2390 The character state (1) has been generally recognized as indicative of affinities with  
2391 Orthoptera (Gorochov, 2001; Gorochov & Rasnitsyn, 2002; Sharov, 1968, 1971). Among  
2392 Geraridae, it is present with certainty at least in the selected species and in the slightly younger  
2393 *Gerarus fischeri* (Brongniart, 1885) (see Béthoux & Nel, 2003; locality Commentry, 298.8  
2394 MYA). Note that the character state is regarded by Hennig (1981) as a plesiomorphy, a position  
2395 contradicted by the tree topology obtained herein. It is therefore listed above under Class 1.  
2396 Among extant species, it unambiguously occurs only in Caelifera, Stenopelmatoidea and  
2397 Tettigonioidea (Béthoux, 2012a; Béthoux et al., 2012; Ragge, 1955).

2398 The character state (2) corresponds to a venation pattern that has been interpreted  
2399 differently under the same insect wing venation groundplan, but also under different insect wing  
2400 venation groundplans. Under the serial insect wing venation groundplan, the Zeuner-Sharov-  
2401 Gorochov interpretation diagnoses the occurrence of a fork of CuA (into CuA<sub>1</sub> and CuA<sub>2</sub>) before  
2402 the fusion of the anterior branch (CuA<sub>1</sub>) with MP with, regarded as both unique and derived.  
2403 Under the same groundplan, the Béthoux and Nel (2002)'s interpretation (of the same structure)  
2404 diagnoses the occurrence of a fusion of CuA (emerging from M + CuA) with the anterior branch  
2405 of CuPa. The fact that CuPa is branched before the fusion (of its anterior branch) with CuA is  
2406 considered both unique and derived.

2407 Under the M<sub>5</sub> wing venation groundplan, Rasnitsyn (2002) placed the Geraridae within  
2408 'Eoblattida', an assemblage regarded as including both putative stem-Polyneoptera and stem-  
2409 lineages of Polyneopteran main groups (therefore, to some extent, similar to Carpenter's  
2410 Protorthoptera). Based on fig. 360 in this contribution (second item) it can be derived that this

2411 author diagnoses a fusion of  $M_5$  with  $CuA_1$ . In the same book, Rasnitsyn in Gorochov and  
 2412 Rasnitsyn (2002) diagnose the same pattern for Orthoptera (fig. 432). According to the  $M_5$  wing  
 2413 venation groundplan,  $CuA$  (emerging from  $Cu$ ; concave) fuses with  $M_5$  (convex), the resulting  
 2414 vein being convex. A fork of  $CuA$  before the fusion with  $M_5$  is then to be regarded as derived  
 2415 and diagnostic of a stem- or total-Orthoptera (our analysis, and A. P. Rasnitsyn pers. com. to O.  
 2416 Béthoux, 2017; see also Aristov, 2014, pp. 40–41).

2417 To our knowledge, under this wing venation groundplan, the only resemblance to this  
 2418 pattern can be found in Archimylacridae [considered putative stem-Dictyoptera by some (see  
 2419 (Béthoux, 2008b; Laurentiaux-Vieira & Laurentiaux, 1980); among others] in which an oblique  
 2420 structure bridges branches belonging to  $M$  on one hand and  $CuA$ , after it forked, on the other (the  
 2421 oblique structure then being  $M_5$  under the eponym groundplan). According to A. P. Rasnitsyn  
 2422 (pers. com. to O. Béthoux, 2017), this organization was acquired convergently in stem-  
 2423 Blattodea/Dictyoptera ( $M_5$  being then lost in crown-Blattodea/Dictyoptera and stem-groups  
 2424 closer to the crown than Archimylacridae).

2425 In summary, the Geraridae can be confidently identified as stem-Orthoptera based on  
 2426 character state (2) under all interpretations, but the state is relegated into Class 2 because it is  
 2427 homoplastic under one of the proposed insect wing venation groundplans. Among extant species  
 2428 the corresponding structure is preserved only in Hagloidea, Tettigonioidea, and some  
 2429 Stenopelmatoidea (Béthoux, 2012a, b; Béthoux et al., 2012; Chivers et al., 2017; among recent  
 2430 accounts). It was altered in Caelifera, Grylloidea and Gryllotalpoidea (visible in putative stem-  
 2431 groups of these lineages; Béthoux, 2012a; Sharov, 1968, 1971). The character is present in  
 2432 related species from several contemporaneous localities, including Mazon Creek and Xiaheyan  
 2433 (Béthoux et al., 2012; Gu et al., 2017).

2434 However, because *Osnogerarus trecwithiensis* is contemporaneous to *Qilianiblatta*  
 2435 *namurensis*, and because the latter calibrates a split expected to have occurred later than the  
 2436 Orthoptera + sister-group split, it follows that *Osnogerarus trecwithiensis* is not useful for  
 2437 calibration, given the obtained topology.

2438

### 2439 *Palaeotaeniopteryx elegans* Sharov, 1961

2440 **Preliminary remarks:** The species was putatively useful as stem-Plecoptera.

2441 **Original description:** Sharov, A.G. (1961) Otryad Plecoptera in Paleozojskoe  
 2442 nasekomye Kuznetskovo bassejna. *Trudy Paleontologicheskogo instituta, Akademiya Nauk*  
 2443 *SSSR*, **85**, 225–234.

2444 **Further descriptive accounts:** None.

2445 **Locality:** Kuznetsk (268.3 MYA).

2446 **Discussion:** The placement of *Palaeotaeniopteryx elegans* as stem-Plecoptera is based on  
 2447 the following character states:

2448 Ultimate level:

2449 Class 1: (1) in both wing pairs, occurrence of a single cross-vein in the areas between RA  
 2450 and RP, and between RP and M/MA; (2) in hind wing, occurrence of a single cross-vein in the  
 2451 area between M/MP and CuA (in addition to the arculus).

2452 Class 2: (3) in hind wing, RP fused with MA; (4) in both wing pairs, occurrence of a  
 2453 strong cross-vein connecting M and CuA just distal of the origin of the latter ('arculus'); (5) in  
 2454 both wing pairs, ScP reaching RA.

2455 Contextual level:

2456 Class 1: none found / considered.

2457 Class 2: none found / considered.

2458 The species was originally placed in the family Taeniopterygidae, indicating that it would  
 2459 be a crown-Plecoptera. Sharov (1961) provided a brief description of the family, including the  
 2460 character states 'RP branched distally, with 2-4 branches', 'CuA with 1-4 branches', and 'CuP  
 2461 straight'. None of these character states are unique to the family.

2462 The species was further placed in the Palaeonemouridae by Sinitshenkova (1987).  
 2463 According to Sinitshenkova (2002) this family is composed of stem-Euholognatha (i.e. crown-  
 2464 Plecoptera). However, the character supporting the corresponding taxon (therein termed  
 2465 'Nemourina') refers to antennae, which are documented in a specimen putatively assigned to the  
 2466 species but which lacks wings, and therefore cannot be unambiguously related to the holotype of  
 2467 *Palaeotaeniopteryx elegans* (composed of a forewing). Among character state regarded as  
 2468 synapomorphic of the Plecoptera by Sinitshenkova (2002), the only putatively relevant one is  
 2469 'fore wing with 2 rows cross-veins aligned CuA'; however, the meaning of this formulation is  
 2470 obscure to us.

2471 The family Palaeonemouridae is relegated as stem-Plecoptera by Grimaldi (2005), echoing  
 2472 the general caution expressed by Zwick (2000) regarding the placement of fossil species (but  
 2473 who nevertheless admits the occurrence of Permian stem-Plecoptera). Note that Wolfe et al.  
 2474 (2016) relied on a personal communication to propose that *Palaeotaeniopteryx elegans* could be  
 2475 a crown-Plecoptera. Substantiation for such statement is yet to be published (and see below).

2476 The placement of *Palaeotaeniopteryx elegans* as stem-Plecoptera can be firmly  
 2477 established based on the occurrence of the character state (1). Note that its occurrence in this  
 2478 species' hind wing is based on a hind wing imprint found isolated from the holotype (a forewing)  
 2479 from the same locality. That the two specimens are conspecific (similar size, distal branching of  
 2480 RP) is likely but cannot be positively assessed based on the available data (at worst they  
 2481 represent closely related species). Yet, the character state remains relevant if converted into 'in  
 2482 forewing, occurrence of a single cross-vein [...]' or 'in hind wing, occurrence of a single cross-  
 2483 vein [...]'. Within stoneflies there are exceptions in which the distal part of the corresponding  
 2484 areas is filled with cross-veins. This is the case in Pteronarcyidae and Peltoperlidae (both  
 2485 Arctoperlaria), and generally in Antarctoperlaria. Given that the character state is undoubtedly  
 2486 derived, its occurrence either indicates that (i) Antarctoperlaria retain a plesiomorphic condition,  
 2487 hence that *Palaeotaeniopteryx elegans* is at least a stem-Arctoperlaria (hence a crown-  
 2488 Plecoptera), or that (ii) Antarctoperlaria display a secondary acquisition of cross-venation in the

2489 distal part of the corresponding areas (as is likely the case of the arctoperlarian Pteronarcyidae  
 2490 and Peltoperlidae), implying that *Palaeotaeniopteryx elegans* is a stem-Plecoptera. In the  
 2491 absence of suitable review on the wing venation of Antarctoperlaria, which would allow a proper  
 2492 appreciation of the character state distribution in the group, we conservatively considered  
 2493 *Palaeotaeniopteryx elegans* a stem-Plecoptera. The same discussion applies to character state  
 2494 (2). Given the relevance of character states (1) and (2), further supporting character states listed  
 2495 above do not need to be evaluated in detail.

2496 Considered a stem-Plecoptera, *Palaeotaeniopteryx elegans* is younger than *Qilianiblatta*  
 2497 *namurensis*. Because the latter calibrates a split expected to have occurred later than the  
 2498 Plecoptera + sister-group split, it follows that *Palaeotaeniopteryx elegans* is not useful for  
 2499 calibration, given the obtained topology.

2500

### 2501 *Periplaneta houlberti* Piton, 1940

2502 **Preliminary remarks:** As indicated in their fig. 1 and tab. 1, the fossil was used as  
 2503 calibration point by Bourguignon et al. (2018) as member of the crown-group Blattinae  
 2504 (including an Archiblattinae), presumably as stem-(*Blatta* + *Neostylopyga*) + (*Protagonista* +  
 2505 *Shelfordella* + *Periplaneta* spp.).

2506 **Original description:** Piton, L.E. (1940) Paléontologie du gisement éocène de Menat  
 2507 (Puy-de-Dôme) (flore et faune). *Mémoires de la Société d'Histoire Naturelle d'Auvergne*, **1**, 1–  
 2508 303.

2509 **Further descriptive accounts:** None (but see  
 2510 <https://science.mnhn.fr/institution/mnhn/collection/f/item/r07034>).

2511 **Locality:** Menat (ca. 60.0 MYA).

2512 **Discussion:** Piton (1940) described this fossil and placed it in the Blattinae based on the  
 2513 character states (1) narrow and lanceolate elytra, (2) large size, and (3) secondary branching of  
 2514 RA+RP branches. Based on our observation of the specimen (and see further descriptive  
 2515 accounts), the actual occurrence of the character state (1) is not substantiated: the posterior and  
 2516 apical wing margins are not preserved/exposed, and a half of the wing is probably missing,  
 2517 including the whole AA area. As for character state (2), it is obviously not decisive at such  
 2518 taxonomic level. As for character state (3), it is not unique to Blattinae (it can be found in many  
 2519 Blaberidae and Nyctiborinae, among others). The assignment to the genus *Periplaneta* proposed  
 2520 by Piton (1940) was not based on any explicit character state ('it seems to us that it is towards  
 2521 the genus *Periplaneta* (*sensu lato*) that our fossil should be accommodated'; transl. O. Béthoux,  
 2522 2018). Moreover, Piton (1940) refers to South American representatives of *Periplaneta*, a genus  
 2523 nowadays regarded as strictly afro-tropical and indo-malayan. It is then possible that Piton  
 2524 (1940) had *Pelmatosilpha* species in mind, which are the only macropterous representatives of  
 2525 Blattinae occurring in South America. Were this proposal substantiated with morphological  
 2526 evidence (which it is not), the fossil would then be a proper calibration point for Polyzosteriinae  
 2527 (as opposed to Blattinae). In summary, as used by Bourguignon et al. (2018), the fossil fails to  
 2528 fulfill **CR2** for the intended node.

2529 *Permotettigonia gallica* Nel & Garrouste in Garrouste, Hugel, Jacquelin, Rostan, Steyer,  
2530 Desutter-Grandcolas & Nel 2016

2531 **Preliminary remarks:** The species was putatively useful as stem-Tettigonioidea (in our  
2532 species sample, as sister-group to *Nippancistroger*, assuming a Stenopelmatoidea-Tettigonioidea  
2533 sister-group relationship).

2534 **Original description:** Garrouste, R., Hugel, S., Jacquelin, L., Rostan, P., Steyer, J.-S.,  
2535 Desutter-Grandcolas, L. & Nel, A. (2016) Insect mimicry of plants dates back to the Permian.  
2536 *Nature Communications*, **7**, 13735.

2537 **Further descriptive accounts:** None.

2538 **Locality:** Roua Valley (ca. 270 MYA).

2539 **Remarks:** Garrouste et al. (2016) interpreted *Permotettigonia gallica* as a Permian stem-  
2540 Tettigonioidea. Therefore the species is a potentially critical calibration point, given the relative  
2541 uncertainties on the position of *Raphogla rubra* (see the case in the ‘Section S2.1’). Indeed,  
2542 according to Song et al. (2015), Tettigonioidae are more closely related to Stenopelmatoidea than  
2543 to Grylloidea + Gryllotalpoidea.

2544 The assignment of *Permotettigonia gallica* was based on the character states (1) complete  
2545 absence of the vein [sic] MA, M and CuA, with no secondary branches, and (2) occurrence of an  
2546 archaediectyon. The meaning of the state (1) is obscure to us, as the authors labelled a vein ‘M’ on  
2547 their reconstruction of the forewing of the species (fig. 1b), and ‘M’ and ‘CuA’ veins on a  
2548 forewing of an extant Tettigonioidea they illustrated (suppl. fig. 2). The lack of ‘secondary  
2549 branches’ is equally obscure. Understood as ‘lack of secondary intercalary veins’, it is at best a  
2550 plesiomorphy. As for character state (2), based on our personal observations (O. Béthoux, 2017),  
2551 it does not occur; cross-venation is instead of scalariform type (i.e. without reticulation), a state  
2552 known in Late Palaeozoic and Triassic stem-Ensifera (Gorochoy, 1986; Marchal-Papier et al.,  
2553 2000; Sharov, 1968, 1971). It follows that the species occupies a phylogenetic position similar to  
2554 that of *Raphogla rubra*, which is older. *Permotettigonia gallica* was therefore not further  
2555 considered.

2556

2557 *Piniblattella vitimica* (Vishniakova, 1964)

2558 **Preliminary remarks:** As indicated in their tab. 1, the fossil was used as calibration  
2559 point by Legendre et al. (2015) as stem-Blaberoidea (hence crown-Blattodea).

2560 **Original description:** Vishniakova, V.N. (1964) Osobennosti jilkovaniya perednikh  
2561 krylev novogo nozdneyurskovo tarakana. *Paleontologicheskii Zhurnal*, **1964**, 82–87.

2562 **Further descriptive accounts:** The species and closely related ones were documented by  
2563 Vršanský (1997).

2564 **Locality:** Baissa (ca. 70 MYA).

2565 **Discussion:** While *Piniblattella* species are generally considered to be Blaberoidea  
2566 (Legendre et al., 2015), and possibly Blattellinae (Vršanský, 1997), we consider a generic  
2567 revision necessary to clarify some character states conflicting with such placements. Vršanský  
2568 (1997) notes that the subgenital plate in some individuals of *Piniblattella vitimica* is valvate, a



2569 character state well-known to be lost in the ancestral Blaberoidea (Hörnig et al., 2018). The  
 2570 presence of tergal glands on abdominal segments VII and VIII is also indicated by Vršanský  
 2571 (1997). While we cannot corroborate whether the supposed glands are internal or external, we  
 2572 note that tergal glands are present in all cockroaches but not always associated with external  
 2573 tergal modification (Roth, 1969, 2003). In other words, we considered structures described by  
 2574 Vršanský (1997) as insufficiently demonstrative. Moreover, while sclerotized and externally  
 2575 visible tergal glands posterior to abdominal segment I are most common in Blaberoidea, they are  
 2576 also present in Blattoidea (Roth, 1969). In summary, as used by Legendre et al. (2015), the fossil  
 2577 fails to fulfill **CR2** for the intended node.

2578

### 2579 *Praelocustopsis mirabilis* Sharov, 1968

2580 **Preliminary remarks:** The species was putatively useful as stem-Caelifera.

2581 **Original description:** Sharov, A.G. (1968) Filogeniya orthopteroidnykh nasekomykh.  
 2582 *Trudy Paleontologicheskogo instituta, Akademiya Nauk SSSR*, **118**, 1–216.

2583 **Further descriptive accounts:** None.

2584 **Locality:** Bugarikta (ca. 250 MYA)

2585 **Remarks:** *Praelocustopsis mirabilis* was regarded by Sharov (1968) as a stem-Caelifera  
 2586 comparatively closer to crown-Caelifera than the slightly younger ‘Locustaviidae’ (itself  
 2587 regarded as composed of the most ‘remote’ stem-Caelifera). The character state ‘in forewing,  
 2588 basal displacement (or translocation onto CuPa) of the free portion of CuA’ [interpreted by  
 2589 Sharov (1968) as ‘MP converted into a cross-vein’] as diagnostic of the ‘Locustaviidae’ (i.e.  
 2590 total-Caelifera; and see Béthoux & Ross, 2005). However, our examination of the material (O.  
 2591 Béthoux, pers. obs., 2002, 2017) let us believe that a distinct CuA occurs in this species [Sharov  
 2592 (1968) indeed represented a cross-vein stronger than others where the portion of CuA occurs].  
 2593 Another relevant character state could have been ‘in hind wing, distal emergence of M from a  
 2594 common stem with RP’, as figured by Sharov (1968: fig. 34D). However, our examination of the  
 2595 material (O. Béthoux, pers. obs., 2017) revealed that M is actually parallel to RP since the split  
 2596 of M + CuA (into M and CuA). There is no other unambiguous character state supporting the  
 2597 placement of the species as stem-Caelifera, although the general habitus of the species definitely  
 2598 suggests close affinities with this group.

2599 In any case, *Praelocustopsis mirabilis* would have been relevant to date the same split as  
 2600 *Raphogla rubra* (given the placement herein adopted for this species), but the latter is older (see  
 2601 ‘Section S2.1’). The same comment applies to other known putative stem-Caelifera.

2602

### 2603 *Prochaeradodis enigmaticus* Piton, 1940

2604 **Preliminary remarks:** As indicated in their tab. 1, the fossil was used as calibration  
 2605 point by Legendre et al. (2015) as stem-Choeradodinae (hence crown-Mantodea). As indicated in  
 2606 their tab. 2, a similar placement was assumed by Wang et al. (2017).



2607           **Original description:** Piton, L.E. (1940) Paléontologie du gisement éocène de Menat  
 2608 (Puy-de-Dôme) (flore et faune). *Mémoires de la Société d'Histoire Naturelle d'Auvergne*, **1**, 1–  
 2609 303.

2610           **Further descriptive accounts:** Nel and Roy (1996) provided a first revision of the  
 2611 known material, followed by Cui et al. (2018).

2612           **Locality:** Menat (ca. 60.0 MYA).

2613           **Discussion:** Cui et al. (2018) demonstrated that the species is a member of Blattodea (as  
 2614 opposed to a Mantodea) of uncertain familial affinities. Therefore, as used by Legendre et al.  
 2615 (2015) and Wang et al. (2017), the fossil fails to fulfill **CR2** for the intended node.

2616

2617 ***Prochresmoda grauvogeli* Nel, Marchal-Papier, Béthoux & Gall, 2004.**

2618           **Preliminary remarks:** The species was putatively useful as stem-Phasmatodea.

2619           **Original description:** Nel, A., Marchal-Papier, F., Béthoux, O. & Gall, J.-C. (2004) A  
 2620 'stick insect-like' from the Triassic of The Vosges (France) (Insecta: 'Phasmatodea'). *Annales de*  
 2621 *la Société Entomologique de France*, **40**, 31–36.

2622           **Further descriptive accounts:** None.

2623           **Locality:** Grès à Voltzia (240.5 My).

2624           **Discussion:** The systematic affinities of the species were considered uncertain in the  
 2625 original description. Moreover the affinities of the Chresmodidae, the family it is assigned to,  
 2626 remain unclear, despite recent discoveries (Delclòs et al., 2008; Zhang et al., 2017; Zhang et al.,  
 2627 2009). In summary the species was not considered because it fails to fulfill **CR2** for the intended  
 2628 node.

2629

2630 ***Reticulitermes antiquus* (Germar, 1813)**

2631           **Preliminary remarks:** As indicated in their fig. 1 and tab. 1, the fossil was used as  
 2632 calibration point by Bourguignon et al. (2018) as member of the crown-group (*Reticulitermes* +  
 2633 *Coptotermes* + *Heterotermes*), presumably as member of the genus *Reticulitermes*.

2634           **Original description:** Germar, C.G. (1813) Insekten in Bernstein eingeschlossen,  
 2635 beschrieben aus dem academischen Mineralien-Cabinet zu Halle. *Magazin der Entomologie*, **1**,  
 2636 11–18.

2637           **Further descriptive accounts:** See Emerson (1971) and Engel et al. (2007b) and  
 2638 references therein. A photograph of a specimen assigned to this species was reproduced as fig.  
 2639 382 in Belayeva (2002).

2640           **Locality:** Baltic amber (age uncertain, Eocene).

2641           **Discussion:** The phylogenetic position of the species was tested by Engel et al. (2009),  
 2642 who retrieved a relationship (*Coptotermes* + (*Heterotermes* + *Reticulitermes*), as opposed to  
 2643 Bourguignon et al. (2018)'s (*Reticulitermes* + (*Heterotermes* + *Coptotermes*)). Moreover, Engel  
 2644 et al. (2009) retrieved *Reticulitermes antiquus* as sister-group to a clade including extant species  
 2645 assigned to both *Reticulitermes* and *Heterotermes*, indicating that the generic placement is  
 2646 dubious (assuming that genera should be monophyletic). In the absence of a re-evaluation of the

2647 character states supporting the placement of the fossil species, there is disagreement between  
2648 morphology and molecular data.

2649         Given the above, and because the age of Baltic amber is poorly constrained, we refrained  
2650 from using this species as calibration point in our analysis. In summary, as used by Bourguignon  
2651 et al. (2018) the fossil fails to fulfill **CR2** and **CR3** for the intended node, and is not an ideal case  
2652 regarding **CR4** and **CR5**.

2653

## 2654 **References**

2655 Aristov, D.S. (2012) Composition and distribution of the family Cacurgidae (Insecta;  
2656 Grylloblattida). *Paleontological Journal*, **46**, 250–257.

2657 Aristov, D.S. (2014) Classification of the order Cnemidolestida (Insecta: Perlidea) with  
2658 descriptions of new taxa. *Far Eastern Entomologist*, **277**, 1–46.

2659 Bechly, G. (2007). Isoptera: termites. In *The Crato fossil beds of Brazil* (ed. by D.M. Martill, G.  
2660 Bechly & R.F. Loveridge), pp. 249–262. Cambridge University Press, Cambridge, UK.

2661 Belayeva, N.V. (2002). Order Termitida Latreille, 1802. The termites (=Isoptera Brullé, 1832).  
2662 In *History of Insects* (ed. by A.P. Rasnitsyn & D.L.J. Quicke), pp. 270–273. Kluwer Academic  
2663 Publishers, Dordrecht.

2664 Berendt, G.C. (1836) Mémoire pour servir à l'histoire des blattes antédiluviennes. *Annales de la*  
2665 *Société Entomologique de France*, **5**, 539–546, pl. 16.

2666 Béthoux, O. (2005a) Cnemidolestodea (Insecta): an ancient order reinstated. *Journal of*  
2667 *Systematic Palaeontology*, **3**, 403–408.

2668 Béthoux, O. (2005b) Wing venation pattern of Plecoptera (Neoptera). *Illiesia*, **1**, 52–81.

2669 Béthoux, O. (2007a) Cladotypic taxonomy applied: titanopterans are orthopterans. *Arthropod*  
2670 *Systematics & Phylogeny*, **65**, 135–156.

2671 Béthoux, O. (2007b) Emptying the Paleozoic wastebasket for insects: members of a  
2672 Carboniferous 'protorthopterous family' reassigned to natural groups. *Alavesia*, **1**, 41–48.

2673 Béthoux, O. (2008a) Groundplan, nomenclature, homology, phylogeny, and the question of the  
2674 insect wing venation pattern. *Alavesia*, **2**, 219–232.

2675 Béthoux, O. (2008b) Revision and phylogenetic affinities of the lobeatid species *bronsoni* Dana,  
2676 1864 and *silvatica* Laurentiaux & Laurentiaux-Vieira, 1980 (Pennsylvanian; *Archaeorthoptera*).  
2677 *Arthropod Systematics & Phylogeny*, **66**, 145–163.

2678 Béthoux, O. (2012a) *Grylloptera* – a unique origin of the stridulatory file in katydids, crickets,  
2679 and their kin (*Archaeorthoptera*). *Arthropod Systematics & Phylogeny*, **70**, 43–68.

2680 Béthoux, O. (2012b) King crickets, raspy crickets & weta, their wings, their fossil relatives.  
2681 *Journal of Orthoptera Research*, **21**, 179–225.

- 2682 Béthoux, O., Beckemeyer, R.J., Engel, M.S., & Hall, J.D. (2010) New Data on *Homocladus*  
2683 *grandis*, A Permian Stem-Mantodean (Polyneoptera: Dictyoptera). *Journal of Paleontology*, **84**,  
2684 746-753.
- 2685 Béthoux, O. & Briggs, D.E.G. (2008) How *Gerarus* lost its head: stem-group Orthoptera and  
2686 Paraneoptera revisited. *Systematic Entomology*, **33**, 529–547.
- 2687 Béthoux, O., Cui, Y., Kondratieff, B., Stark, B., & Ren, D. (2011a) At last, a Pennsylvanian  
2688 stem-stonefly (Plecoptera) discovered. *BMC Evolutionary Biology*, **11**, 248.
- 2689 Béthoux, O., Gu, J.-j., & Ren, D. (2012) A new Upper Carboniferous stem-orthopteran (Insecta)  
2690 from Ningxia (China). *Insect Science*, **19**, 153–158.
- 2691 Béthoux, O. & Nel, A. (2002) Venation pattern and revision of Orthoptera sensu nov. and sister  
2692 groups. Phylogeny of Palaeozoic and Mesozoic Orthoptera sensu nov. *Zootaxa*, **96**, 1–88.
- 2693 Béthoux, O. & Nel, A. (2003) Wing venation morphology and variability of *Gerarus fischeri*  
2694 (Brongniart, 1885) sensu Burnham (Panorthoptera; Upper Carboniferous, Commentry, France),  
2695 with inferences on flight performances. *Organisms Diversity & Evolution*, **3**, 173–183.
- 2696 Béthoux, O. & Nel, A. (2005) Some Palaeozoic 'Protorthoptera' are 'ancestral' orthopteroids:  
2697 major wing braces as clues to a new split among the 'Protorthoptera'. *Journal of Systematic*  
2698 *Palaeontology*, **2**, 285–309.
- 2699 Béthoux, O. & Ross, A. (2005) *Mesacridites* Riek, 1954 (Middle Triassic; Australia) transferred  
2700 from Protorthoptera to Orthoptera: Locustavidae. *Journal of Paleontology*, **79**, 607–610.
- 2701 Béthoux, O., Schneider, J.W., & Klass, K.D. (2011b) Redescription of the holotype of  
2702 *Phyloblatta gaudryi* (Agnus, 1903) (Pennsylvanian; Commentry, France), an exceptionally well  
2703 preserved stem-dictyopteran. *Geodiversitas*, **33**, 625-635.
- 2704 Béthoux, O. & Wieland, F. (2009) Evidence for Carboniferous origin of the order Mantodea  
2705 (Insecta: Dictyoptera) gained from forewing morphology. *Zoological Journal of the Linnean*  
2706 *Society*, **156**, 79-113.
- 2707 Bourguignon, T., Tang, Q., Ho, S.Y.W., Juna, F., Wang, Z., Arab, D.A., Cameron, S.L., Walker,  
2708 J., Rentz, D., Evans, T.A., & Lo, N. (2018) Transoceanic dispersal and plate tectonics shaped  
2709 global cockroach distributions: Evidence from mitochondrial phylogenomics. *Molecular Biology*  
2710 *and Evolution*, **35**, 1-14.
- 2711 Brannoch, S.K., Wieland, F., Rivera, J., Klass, K.-D., Béthoux, O., & Svenson, G.J. (2017)  
2712 Manual of praying mantis morphology, nomenclature, and practices (Insecta, Mantodea).  
2713 *ZooKeys*, **696**, 1-100.
- 2714 Brauckmann, C. & Herd, K.J. (2006) Insekten-Funde aus dem Westfalium D (Ober-Karbon) des  
2715 Piesberges bei Osnabrück (Deutschland). Teil 2: Neoptera. *Osnabrücker Naturwissenschaftliche*  
2716 *Mitteilungen*, **30/31 (for 2005)**, 19–65.

- 2717 Brongniart, C. (1885) Les Insectes fossiles des terrains primaires. Coup d'oeil rapide sur la faune  
2718 entomologique des terrains paléozoïques. *Bulletin de la Société des Amis des Sciences naturelles*  
2719 *de Rouen*, **1885**, 50–68.
- 2720 Brongniart, C. (1893) Recherches pour servir à l'histoire des insectes fossiles des temps  
2721 primaires précédées d'une étude sur la nervation des ailes des insectes. *Bulletin de la Société*  
2722 *d'Industrie Minérale de Saint-Etienne* (3), **7**, 124–615.
- 2723 Carpenter, F.M. (1966) The Lower Permian insects of Kansas. Part 11: The orders Protorthoptera  
2724 and Orthoptera. *Psyche*, **73**, 46–88.
- 2725 Carpenter, F.M. (1992). Superclass Hexapoda. In Treatise on Invertebrate Paleontology (ed. by  
2726 R.L. Kaesler), Vol. 4, pp. xxii+655. The Geological Society of America and the University of  
2727 Kansas, Boulder.
- 2728 Chivers, B.D., Béthoux, O., Sarria-S., F.A., Jonsson, T., Mason, A.C., & Montealegre-Z., F.  
2729 (2017) Functional morphology of tegmina-based stridulation in the relict species *Cyphoderris*  
2730 *monstrosa* (Orthoptera: Ensifera: Prophalangopsidae). *Journal of Experimental Biology*, **220**,  
2731 1112–1121.
- 2732 Cui, Y., Evangelista, D.A., & Béthoux, O. (2018) Prayers for fossil mantis unfulfilled:  
2733 *Prochaeradodis enigmaticus* Piton, 1940 is a cockroach (Blattodea). *Geodiversitas*, **40**, 355-362.
- 2734 Cui, Y., Storozhenko, S.Y., & Ren, D. (2012) New and little-known species of Geinitziidae  
2735 (Insecta: Grylloblattida) from the Middle Jurassic of China, with notes on taxonomy, habitus and  
2736 habitat of these insects. *Alcheringa*, **36**, 251–261.
- 2737 Delclòs, X., Nel, A., Azar, D., Bechly, G., Dunlop, J.A., Engel, M.S., & Heads, S.W. (2008) The  
2738 enigmatic Mesozoic insect taxon Chresmodidae (Polyneoptera): New palaeobiological and  
2739 phylogenetic data, with the description of a new species from the Lower Cretaceous of Brazil.  
2740 *Neues Jahrbuch für Geologie und Paläontologie, Abhandlungen*, **247**, 353–381.
- 2741 Du, S., Béthoux, O., Gu, J., & Ren, D. (2017) *Protomiamia yangi* gen. et sp. nov. (Early  
2742 Pennsylvanian; Xiaheyan, China), a sexually dimorphic Palaeozoic stem-Orthoptera. *Journal of*  
2743 *Systematic Palaeontology*, **15**, 193–204.
- 2744 Durden, C.J. (1969) A simple notation for the naming of segments of complex dendroids in  
2745 insect wing venation. *Journal of the New York Entomological Society*, **77**, 204–207.
- 2746 Emerson, A.E. (1971) Tertiary fossil species of the Rhinotermitidae (Isoptera), phylogeny of  
2747 genera, and reciprocal phylogeny of associated Flagellata (Protozoa) and the Staphylinidae  
2748 (Coleoptera). *Bulletin of the American Museum of Natural History*, **146**, 243–304.
- 2749 Engel, M.S., Grimaldi, D., & Krishna, K. (2007a) Primitive termites from the Early Cretaceous  
2750 of Asia (Isoptera). *Stuttgarter Beiträge zur Naturkunde (B)*, **371**, 1–32.
- 2751 Engel, M.S., Grimaldi, D.A., & Krishna, K. (2007b) A synopsis of Baltic amber termites  
2752 (Isoptera). *Stuttgarter Beiträge zur Naturkunde Serie B (Geologie und Paläontologie)*, **372**, 1-18.

- 2753 Engel, M.S., Grimaldi, D.A., & Krishna, K. (2009) Termites (Isoptera): Their Phylogeny,  
2754 Classification, and Rise to Ecological Dominance. *American Museum Novitates*, **3650**, 1-27.
- 2755 Evangelista, D.A., Djernæs, M., & Kohli, M.K. (2017) Fossil calibrations for the cockroach  
2756 phylogeny (Insecta, Dictyoptera, Blattodea), comments on the use of wings for their  
2757 identification, and a redescription of the oldest Blaberidae. *Palaeontologia Electronica*, **20.3**, 1-  
2758 23.
- 2759 Garrouste, R., Hugel, S., Jacquelin, L., Rostan, P., Steyer, J.-S., Desutter-Grandcolas, L., & Nel,  
2760 A. (2016) Insect mimicry of plants dates back to the Permian. *Nature Communications*, **7**, 13735.
- 2761 Garwood, R. & Sutton, M. (2010) X-ray micro-tomography of Carboniferous stem-Dictyoptera:  
2762 new insights into early insects. *Biol Lett*, **6**, 699-702.
- 2763 Gorochov, A.V. (1986) Triassovye priamokrilie nadsimeistva Hagloidea (Orthoptera) [Triassic  
2764 Orthoptera of the superfamily Hagloidea (Orthoptera)]. *USSR Academy of Sciences, Proceedings  
2765 of the Zoological Institute, Leningrad*, **143**, 65–100.
- 2766 Gorochov, A.V. (2001) On the higher classification of the Polyneoptera. *Acta Geologica  
2767 Leopoldensia*, **24**, 11–56.
- 2768 Gorochov, A.V. (2013) No evidence for Paleozoic origin of mantises (Dictyoptera: Mantina).  
2769 *Zoosystematica Rossica*, **22**, 6–14.
- 2770 Gorochov, A.V. & Rasnitsyn, A.P. (2002). Superorder Gryllidea Laicharting, 1781  
2771 (=Orthopteroidea Handlirsch, 1903). In *History of Insects* (ed. by A.P. Rasnitsyn & D.L.J.  
2772 Quicke), pp. 293–303. Kluwer Academic Publishers, Dordrecht.
- 2773 Gratshev, V.G. & Zherikhin, V.V. (1993) New fossil mantids (Insect, Mantida). *Paleontological  
2774 Journal*, **27**, 148-165.
- 2775 Grimaldi, D. (2003) A Revision of Cretaceous Mantises and Their Relationships, Including New  
2776 Taxa (Insecta: Dictyoptera: Mantodea). *American Museum Novitates*, **3412**, 1-47.
- 2777 Grimaldi, D.A., Engel, M.S., & Krishna, K. (2008) The species of Isoptera (Insecta) from the  
2778 early Cretaceous Crato Formation: a revision. *American Museum Novitates*, **3626**, 1–30.
- 2779 Grimaldi, D.A.E., Michael (2005) *Evolution of the Insects*.
- 2780 Gu, J.-J., Béthoux, O., & Ren, D. (2017) A new, rare and distinctive species of Panorthoptera  
2781 (Insecta, Archaeorthoptera) from the Upper Carboniferous of Xiaheyan (Ningxia, China). *Fossil  
2782 Record*, **20**, 253–257.
- 2783 Guan, Z., Prokop, J., Roques, P., Lapeyrie, J., & Nel, A. (2016) Revision of the enigmatic insect  
2784 family Anthracoptilidae enlightens the evolution of Palaeozoic stem-Dictyopterans. *Acta  
2785 Palaeontologica Polonica*, **61**, 71–87.
- 2786 Hennig, W. (1981) *Insect Phylogeny* Wiley & Sons, New York.



- 2787 Hörnig, M.K., Haug, C., Schneider, J.W., & Haug, J.T. (2018) Evolution of reproductive  
2788 strategies in Dictyopteran insects — clues from ovipositor morphology of extinct roachoids. *Acta*  
2789 *Palaeontologica Polonica*, **63**, 1-24.
- 2790 Huang, D.-Y. & Nel, A. (2008) New ‘Grylloblattida’ related to the genus *Prosepididontus*  
2791 Handlirsch, 1920 in the Middle Jurassic of China (Insecta: Geinitziidae). *Alcheringa*, **32**, 395–  
2792 403.
- 2793 Kluge, N.G. (2016) Structure of ovipositors and Cladoendesis of Saltatoria, or Orchesopia.  
2794 *Entomological Review*, **96**, 1015–1040.
- 2795 Kukalová-Peck, J. (1991). Fossil History and the Evolution of Hexapod Structures. In *The*  
2796 *Insects of Australia*, a textbook for students and researchers (ed. by I.D. Naumann, P.B. Crane,  
2797 J.F. Lawrence, E.S. Nielsen, J.P. Spradbery, R.W. Taylor, M.J. Whitten & M.J. Littlejohn), Vol.  
2798 1, pp. 141–179. Melbourne University Press, Melbourne.
- 2799 Kukalová-Peck, J. & Beutel, R.G. (2012) Is the Carboniferous †*Adiphlebia lacoana* really the  
2800 “oldest beetle”? Critical reassessment and description of a new Permian beetle family. *European*  
2801 *Journal of Entomology*, **109/110**, 633–645/180.
- 2802 Kukalová-Peck, J. & Brauckmann, C. (1992) Most Paleozoic Protorthoptera are ancestral  
2803 hemipteroids: major wing braces as clues to a new phylogeny of Neoptera (Insecta). *Canadian*  
2804 *Journal of Zoology*, **70**, 2452–2473.
- 2805 Labandeira, C.C. (1994) A compendium of fossil insect families. *Milwaukee Public Museum*  
2806 *Contributions in Biology and Geology*, **88**, 1–71.
- 2807 Laurentiaux-Vieira, F. & Laurentiaux, D. (1980) Nouvelle contribution à la connaissance du  
2808 genre Westphalien *Manoblatta* Pruvost (Blattaires, Archymylacridiens). *Annales de la Société*  
2809 *Géologique du Nord*, **99**, 415-423.
- 2810 Laurentiaux, D. (1958) Contribution à l'étude des insectes carbonifères, Université de Paris,  
2811 Paris.
- 2812 Legendre, F., Nel, A., Svenson, G.J., Robillard, T., Pellens, R., & Grandcolas, P. (2015)  
2813 Phylogeny of Dictyoptera: Dating the origin of cockroaches, praying mantises and termites with  
2814 molecular data and controlled fossil evidence. *PLoS One*, **10**, e0130127.
- 2815 Marchal-Papier, F., Nel, A., & Grauvogel-Stamm, L. (2000) Nouveaux Orthoptères (Ensifera,  
2816 Insecta) du Trias des Vosges (France). *Acta Geologica Hispanica*, **35**, 5–18.
- 2817 Martynov, A.V. (1940) Permian fossil Insects from Tshekarda. *Trudy Paleontologicheskogo*  
2818 *instituta, Akademiya Nauk SSSR*, **11**, 5–62.
- 2819 Nel, A. & Paicheler, J.-C. (1993) Les Isoptera fossiles. État actuel des connaissances,  
2820 implications paléoécologiques et paléoclimatologiques (Insecta, Dictyoptera). *Cahiers de*  
2821 *Paléontologie, C.N.R.S.*, **1993**, 101–179.



- 2822 Nel, A., Prokop, J., Nel, P., Grandcolas, P., Huang, D.-Y., Roques, P., Guilbert, E., Dostál, O., &  
2823 Szwedo, J. (2012) Traits and evolution of wing venation pattern in Paraneopteran insects.  
2824 *Journal of Morphology*, **273**, 480–506.
- 2825 Nel, A. & Roy, R. (1996) Revision of the fossil "mantid" and "ephemerid" species described by  
2826 Piton from the Palaeocene of Menat (France) (Mantodea: Chaeteessidae, Mantidae; Ensifera:  
2827 Tettigonioidea). *European Journal of Entomology*, **93**, 223-234.
- 2828 New, T.R. (1983) A revision of the Australian Osmylidae: Kempyninae (Insecta: Neuroptera).  
2829 *Australian Journal of Zoology*, **31**, 393–420.
- 2830 Parham, J.F., Donoghue, P.C., Bell, C.J., Calway, T.D., Head, J.J., Holroyd, P.A., Inoue, J.G.,  
2831 Irmis, R.B., Joyce, W.G., Ksepka, D.T., Patane, J.S., Smith, N.D., Tarver, J.E., van Tuinen, M.,  
2832 Yang, Z., Angielczyk, K.D., Greenwood, J.M., Hipsley, C.A., Jacobs, L., Makovicky, P.J.,  
2833 Muller, J., Smith, K.T., Theodor, J.M., Warnock, R.C., & Benton, M.J. (2012) Best practices for  
2834 justifying fossil calibrations. *Systematic Biology*, **61**, 346-59.
- 2835 Piton, L.E. (1940) Paléontologie du Gisement Éocène de Menat (Puy-de-Dôme) (Flore et Faune)  
2836 Imprimeries P. Vallier, France.
- 2837 Prokop, J., Krzeminski, W., Krzeminska, E., Hörschemeyer, T., Ilger, J.-M., Brauckmann, B.,  
2838 Grandcolas, P., & Nel, A. (2014a) Late Palaeozoic Paoliida is the sister group of Dictyoptera  
2839 (Insecta: Neoptera). *Journal of Systematic Palaeontology*, **12**, 601–622.
- 2840 Prokop, J., Roques, P., & Nel, A. (2014b) New non-holometabolous insects from the  
2841 Pennsylvanian of the Avion locality in Pas-de-Calais, France (Insecta: 'Exopterygota').  
2842 *Alcheringa*, **38**, 155–169.
- 2843 Ragge, D.R. (1955) The wing-venation of the Orthoptera Saltatoria with notes on dictyopteran  
2844 wing-venation British Museum (Natural History), London.
- 2845 Rasnitsyn, A.P. (2002). Infraclass Gryllones Laicharting, 1781. The grylloneans (=Polyneoptera  
2846 Martynov, 1938). In History of Insects (ed. by A.P. Rasnitsyn & D.L.J. Quicke), pp. 254–262.  
2847 Kluwer Academic Publishers, Dordrecht.
- 2848 Rentz, D.C.F. (2012) A guide to the cockroaches of Australia CSIRO Publishing, Collingwood,  
2849 Australia.
- 2850 Roth, L.M. (1969) The Evolution of the Male Tergal Glands in the Blattaria. *Annals of the*  
2851 *Entomological Society of America*, **62**, 176-208.
- 2852 Roth, L.M. (2002) The genus *Ischnoptera* Burmeister. I. The *darlingtoni*-species-group, with  
2853 seven new species (Blattaria: Blattellidae, Blattellinae). *Transactions of the American*  
2854 *Entomological Society*, **128**, 109-131.
- 2855 Roth, L.M. (2003) Lamproglandifera flavoglandis, n. gen., n. sp., from Brazil Is Described  
2856 (Blattidae: Lamproblattinae). *Transactions of the American Entomological Society*, **129**, 285-  
2857 293.

- 2858 Schlüter, T. (1978) Zur Systematik und Palökologie harzkonserverter Arthropoda einer  
2859 Taphozönose aus dem Cenomanium von NW-Frankreich. *Berliner Geowissenschaftliche*  
2860 *Abhandlungen (A)*, **9**, 1–150 +13 pls.
- 2861 Schlüter, T. (1989) Neue Daten über harzkonserverte Arthropoden aus dem Cenomanium NW-  
2862 Frankreichs. *Documenta Naturae*, **56**, 59–70.
- 2863 Sendi, H. & Azar, D. (2017) New aposematic and presumably repellent bark cockroach from  
2864 Lebanese amber. *Cretaceous Research*, **72**, 13-17.
- 2865 Sharov, A.G. (1961) Otryad Plecoptera (Order Plecoptera) in Paleozojskoe nasekomye  
2866 Kuznetskovo bassejna (Paleozoic insects from Kuznetsk basin). *Trudy Paleontologicheskogo*  
2867 *instituta, Akademiya Nauk SSSR*, **85**, 225–234.
- 2868 Sharov, A.G. (1962). Order Protoblattodea. In *Osnovy Palaeontology. Chlenistonogie,*  
2869 *Trakheinye i Khelitserovye* (ed. by Y.A. Orlov), Vol. 9, pp. 116–119. Akademyia Nauk SSSR,  
2870 Moscow.
- 2871 Sharov, A.G. (1968) Filogeniya orthopteroidnykh nasekomykh. *Trudy Paleontologicheskogo*  
2872 *instituta, Akademiya Nauk SSSR*, **118**, 1–216.
- 2873 Sharov, A.G. (1971) Phylogeny of the Orthopteroidea Israel Program for Scientific Translations,  
2874 Jerusalem.
- 2875 Sharov, A.G. (1991). Order Protoblattodea. In *Fundamentals of Paleontology. Arthropoda,*  
2876 *Tracheata, Chelicerata* (ed. by B.B. Rohdendorf), Vol. 9, pp. 146–150. Smithsonian Institution  
2877 Libraries, Washington D. C.
- 2878 Shelford, R. (1910) On a collection of Blattidae preserved in amber, From Prussia. *Journal of the*  
2879 *Linnean Society of London, Zoology*, **30**, 336-355.
- 2880 Sinitshenkova, N.D. (1987) Istoricheskoe rasvitie vesnjanok. *Trudy Paleontologicheskovo*  
2881 *Instituta Akademii nauk SSSR*, **221**, 1–143.
- 2882 Sinitshenkova, N.D. (2002). Order Perlida Latreille, 1810. The Stoneflies (= Plecoptera  
2883 Burmeister, 1839). In *History of Insects* (ed. by A.P. Rasnitsyn & D.L.J. Quicke), pp. 281–287.  
2884 Kluwer Academic Publishers, Dordrecht, The Netherlands.
- 2885 Šmídová, L. & Lei, X. (2017) The earliest amber-recorded type cockroach family was  
2886 aposematic (Blattaria: Blattidae). *Cretaceous Research*, **72**, 189-199.
- 2887 Song, H., Amedegnato, C., Ciglianod, M.M., Desutter-Grandcolas, L., Heads, S.W., Huang, Y.,  
2888 Otte, D., & Whiting, M.F. (2015) 300 million years of diversification: elucidating the patterns of  
2889 orthopteran evolution based on comprehensive taxon and gene sampling. *Cladistics*, **31**, 621-  
2890 651.
- 2891 Storozhenko, S.Y. (2002). Order Grylloblattida Walker, 1914 (=Notoptera, Crampton, 1915, =  
2892 Grylloblattodea Brues et Melander, 1932, + Protorthoptera Handlirsch, 1906, = Paraplecoptera

- 2893 Martynov, 1925, + Protoperlaria Tillyard, 1928). In History of Insects (ed. by A.P. Rasnitsyn &  
2894 D.L.J. Quicke), pp. 278–281. Kluwer Academic Publishers, Dordrecht.
- 2895 Tillyard, R.J. (1916) Studies in Australian Neuroptera. No. ii. Descriptions of new genera and  
2896 species of the families Osmylidae, Myrmeleontidae and Ascalaphidae. *Proceedings of the*  
2897 *Linnean Society of New South Wales*, **41**, 41-70.
- 2898 Tillyard, R.J. (1923) The stone-flies of New Zealand (Order Perlaria), with descriptions of new  
2899 genera and species. *Transactions and proceedings of the New Zealand Institute*, **54**, 197–217.
- 2900 Tong, K.J., Duchêne, S., Ho, S.Y.W., & Lo, N. (2015) Comment on “Phylogenomics resolves  
2901 the timing and pattern of insect evolution”. *Science*, **349**, 487-b.
- 2902 Vršanský, P. (1997) *Piniblattella* gen. nov. - the most ancient genus of the family Blattellidae  
2903 (Blattodea) from the Lower Cretaceous of Siberia. *Entomological Problems*, **28**, 67-79.
- 2904 Vršanský, P.V., Smidova, L., Valaska, D., Barna, P., Vidlicka, L., Takac, P., Pavlik, L.,  
2905 Kudelova, T., Karim, T.S., Zelagin, D., & Smith, D. (2016) Origin of origami cockroach reveals  
2906 long-lasting (11 Ma) phenotype instability following viviparity. *The Science of Nature*, **103**, 78.
- 2907 Wang, Z., Shi, Y., Qiu, Z., Che, Y., & Lo, N. (2017) Reconstructing the phylogeny of Blattodea:  
2908 Robust support for interfamilial relationships and major clades. *Scientific Reports*, **7**, 1-8.
- 2909 Wappler, T. & Engel, M.S. (2006) A new record of *Mastotermes* from the Eocene of Germany  
2910 (Isoptera: Mastotermitidae). *Journal of Paleontology*, **80**, 380–385.
- 2911 Winterton, S.L. & Makarkin, V.N. (2010) Phylogeny of moth lacewings and giant lacewings  
2912 (Neuroptera: Ithonidae, Polystoechotidae) using DNA sequence data, morphology, and fossils.  
2913 *Annals of the Entomological Society of America*, **103**, 511–522.
- 2914 Wolfe, J.A., Daley, A.C., Legg, D.A., & Edgecombe, G.D. (2016) Fossil calibrations for the  
2915 arthropod Tree of Life. *Earth-Science Reviews*, **160**, 43–110.
- 2916 Zeuner, F.E. (1939) Fossil Orthoptera Ensifera British Museum (Natural History), London.
- 2917 Zhang, W., Cai, W., Li, W., Yang, X., & Ge, S. (2017) A new species of Chresmodidae from  
2918 Mid-Cretaceous amber discovered in Myanmar. *Zoological Systematics*, **42**, 243–247.
- 2919 Zhang, X., Ren, D., Pang, H., & Shih, C. (2009) Late Mesozoic chresmodids with forewing from  
2920 Inner Mongolia, China (Polyneoptera: Archaeorthoptera). *Acta Geologica Sinica*, **84**, 38–46.
- 2921 Zwick, P. (2000) Phylogenetic system and zoogeography of the Plecoptera. *Annual Review of*  
2922 *Entomology*, **45**, 709–746.
- 2923

## 2924 **S2.3 Locality Ages**

2925            Here we provide the ages for each locality relevant to our chosen fossil calibrations.  
 2926 While we may have discussed other localities not mentioned here, particularly in regards to  
 2927 fossils we have excluded from the analysis, here we only focus on those localities relevant to our  
 2928 fossil calibrations.

### 2929 *Localities*

2930 Xiaheyan (306.9 MYA)

2931 **Geographic location:** Xiaheyan, Ningxia, China.

2932 **Geological settings:** Tupo Formation.

2933 **Stratigraphic data:** See below.

2934 **Age justification:** Ongoing studies are revealing that the age of the insect-yielding strata are  
 2935 younger than previously assumed. While the lowest (most ancient) strata are late Bashkirian  
 2936 (minimum age 315.0 Ma; Cohen et al., 2013), the upper (youngest) ones are Moscovian  
 2937 (minimum age 306.9 Ma; Cohen et al., 2013). The conservative 306.9 Ma age is to be used for  
 2938 Xiaheyan species whose precise origin was not documented.

2939

2940 Lodève (271.8 MYA)

2941 **Geographic location:** Lodève, Hérault, France.

2942 **Geological settings:** Mérifrons Member, Salagou Formation.

2943 **Stratigraphic data:** Artinskian to Kungurian, Early Permian.

2944 **Age justification:** See Wolfe et al. (2016); and references therein.

2945

2946 Elmo (271.8 MYA)

2947 **Geographic location:** Elmo, KS, USA.

2948 **Geological settings:** Carlton Member, Wellington Formation.

2949 **Stratigraphic data:** Leonardian regional stage, Early Permian.

2950 **Age justification:** See Wolfe et al. (2016); and references therein.

2951

2952 Isady (254.1 MYA)

2953 **Geographic location:** Isady, Vologda Region, Russian Federation.

2954 **Geological settings:** Kichuga Member, Poldarsa Formation.

2955 **Stratigraphic data:** Capitanian, Upper Permian.

2956 **Age justification:** The insect-bearing locality Isady belongs to the Kichuga Member of the  
 2957 Poldarsa Formation, itself dated as late Severodvinian based on multiple biostratigraphic  
 2958 markers (Golubev in Aristov et al., 2013; Arefiev et al. 2015). Recent accounts have considered  
 2959 the Severodvinian to correlate closely with the Capitanian (Biakov et al., 2017a; Biakov et al.,  
 2960 2017b; Davydov et al., 2018; Henderson et al., 2012; Lucas & Shen, 2018). Datings of the  
 2961 Capitanian-Wuchiapingian boundary converge towards 258–260 Ma (minimum age of 258.6 Ma  
 2962 according to Lucas & Shen, 2018). However, the Severodvinian has also been regarded as

- 2963 ending within the Wuchiapingian (e.g. Arefiev et al., 2015), a stage which upper boundary is  
 2964 254.1 Ma-old (Cohen et al., 2013).
- 2965
- 2966 Daohugou (158.1 MYA)
- 2967 **Geographic location:** Nincheng County, Inner Mongolia, China.
- 2968 **Geological settings:** Tiaojiang Formation.
- 2969 **Stratigraphic data:** Oxfordian, Upper Jurassic.
- 2970 **Age justification:** See Wolfe et al. (2016); and references therein.
- 2971
- 2972 Clockhouse Brickworks pit (130.3 MYA)
- 2973 **Geographic location:** Surrey, United-Kingdom.
- 2974 **Geological settings:** Lower Weald Clay.
- 2975 **Stratigraphic data:** Hauterivian/Barremian boundary, Lower Cretaceous.
- 2976 **Age justification:** See Wolfe et al. (2016); and references therein.
- 2977
- 2978 Montsec (125.5 MYA)
- 2979 **Geographic location:** Montsec, Spain.
- 2980 **Geological settings:** "La Pedrera Rúbies" and "La Cabrua" Formations.
- 2981 **Stratigraphic data:** Late Barremian or Early Aptian.
- 2982 **Age justification:** We followed Evangelista et al. (2017); see references therein). Note that a  
 2983 slightly older age (viz. 125.71 MYA) was proposed by Wolfe et al. (2016).
- 2984
- 2985 Myanmar amber (98.2 MYA)
- 2986 **Geographic location:** Kachin, Myanmar.
- 2987 **Geological settings:** Hukawng Basin.
- 2988 **Stratigraphic data:** Cenomanian, Upper Cretaceous.
- 2989 **Age justification:** See Wolfe et al. (2016); and references therein.
- 2990
- 2991 Menat (60.0 MYA)
- 2992 **Geographic location:** Puy-de-Dôme, France.
- 2993 **Geological settings:** Menat maar (?).
- 2994 **Stratigraphic data:** Thanetian, Paleocene.
- 2995 **Age justification:** The age of the Menat locality has been long discussed (see (Mayr et al., in  
 2996 press), and references therein; among many others), but the conflicting outcomes coupled with,  
 2997 occasionally, improper reports on previous accounts, prompted us to carry out an exhaustive  
 2998 review. Vincent et al. (1977), based on K/Ar ratios analyses of basaltic layers and of a  
 2999 hornblende occurring at the Menat fossiliferous outcrop, obtained ages ranging from  $51 \pm 2$  to  
 3000  $64 \pm 2$  Ma (average: 56.6 MYA). They also reported a reversed polarity Chron.
- 3001 Kedves in Kedves and Russell (1982; see also Kedves, 1967) studied the palynological  
 3002 content of the Menat fossiliferous layers and concluded that they are of Thanetian age (i.e. 56.0

3003 to 59.2 Ma; Cohen et al., 2013), owing to the occurrence of decisive biostratigraphic markers. In  
 3004 turn, these markers were recovered in marine sediments of the Kroisbach Member, as part of a  
 3005 palynological assemblage similar to that of Menat (Draxler, 2007). Calcarerous nannoplankton  
 3006 contained in the same sediments indicated the *Heliolithus riedelii* zone (i.e. zone NP8; Stradner  
 3007 in Gohrbandt, 1963). The only Chron of reversed polarity overlapping this zone is Chron C25r  
 3008 (Vandenberghé et al., 2012). This gives a maximum age of 58.8 Ma (upper boundary of NP8)  
 3009 and a minimum age of 57.7 Ma (lower boundary of C25r) for the Menat locality, fitting within  
 3010 the age range obtained by Vincent et al. (1977; especially that obtained from the hornblende,  
 3011  $58 \pm 2$  MYA).

3012 Wappler et al. (2009, suppl. data; and see Wedmann et al., 2009) suggested an age in the  
 3013 range of 60–61 Ma (Selandian) based on a personal communication from P. Gingerich to T.  
 3014 Wappler (2008), which indicated that *Plesiadapis insignis*, a fossil mammal recovered from  
 3015 Menat, is mostly similar to the North American species *Plesiadapis praecursor* and *Plesiadapis*  
 3016 *anceps*, themselves of Selandian age. Gingerich (1976) indeed reported that teeth length of the  
 3017 Menat species makes it overall similar to the two above-mentioned North American ones.  
 3018 However, he also stated on multiple occasions that the Menat species is difficult to compare with  
 3019 its supposed American counterparts. One possible reason underlying such caution is that the  
 3020 second lower premolar (P<sub>2</sub>) of the Menat species is much larger than it is in most other species of  
 3021 the genus. Also, and maybe more importantly, the former is known from more or less complete  
 3022 compressed skeletons ('road kill' fossilisation), this making a detailed study of the teeth and  
 3023 cranial morphology difficult, while the latter are known from isolated, 3-dimensionally  
 3024 preserved elements, including mandibles bearing teeth. We doubt the proposed Selandian age as  
 3025 currently justified, but it remains plausible. In summary, we hold that the minimum age with  
 3026 strongest justification is 57.7 Ma, but leave room for new evidence to support the older age of 60  
 3027 Ma.

3028

## 3029 **References**

3030 Arefiev, M.P., Golubev, V.K., Kuleshov, V.N., & Pokrovsky, B.G. (2015) Paleogeographical  
 3031 reorganization of the Moscow syneclise during the Severodvinian (Capitanian–Wuchiapingian)  
 3032 time based on Isotopic ( $\delta^{13}\text{C}$  and  $\delta^{18}\text{O}$ ) and paleontological data, Permian Period, East  
 3033 European Platform. *Paleontological Journal*, **49**, 1206–1227.

3034 Aristov, D.S., Bashkuev, A., Golubev, V.K., Gorochoy, A.V., Karasev, E.V., Kopylov, D.S.,  
 3035 Ponomarenko, A.B., Rasnitsyn, A.P., Rasnitsyn, D.A., Sinitshenkova, N.D., Sukatsheva, I.D., &  
 3036 Vassilenko, D.V. (2013) Fossil insects of the Middle and Upper Permian of European Russia.  
 3037 *Paleontological Journal*, **47**, 641–832.

3038 Biakov, A.S., Goryachev, N.A., Vedernikov, I.L., Brynko, I.V., & Tolmacheva, E.V. (2017a)  
 3039 New results of U–Pb SHRIMP dating of Zircons from Upper Wuchiapingian (Upper Permian)  
 3040 deposits in Northeastern Russia. *Doklady Earth Sciences*, **477**, 1348–1352.

3041 Biakov, A.S., Shpikerman, V.I., Vedernikov, I.L., & Tolmacheva, E.V. (2017b) The first U–Pb  
 3042 SIMS age datings of zircons from Upper Permian deposits of the Northeastern Russia:



- 3043 significance for interregional correlations. *Stratigraphy and Geological Correlations*, **25**, 256–  
3044 264.
- 3045 Cohen, K.M., Finney, S.C., Gibbard, P.L., & Fan, J.-X. (2013) The ICS International  
3046 Chronostratigraphic Chart (updated v2017/02). *Episodes*, **36**, 199–204.
- 3047 Davydov, V.I., Biakov, A.S., Schmitz, M.D., & Silantiev, V.V. (2018) Radioisotopic calibration  
3048 of the Guadalupian (middle Permian) series: Review and updates. *Earth-Science Reviews*, **176**,  
3049 222–240.
- 3050 Draxler, I. (2007) Significant palynomorphs from the Thanetian Kroisbach-Member in Salzburg  
3051 (Eastern Alps, Austria). *Jahrbuch der Geologischen Bundesanstalt*, **147**, 357–377.
- 3052 Evangelista, D.A., Djernæs, M., & Kohli, M.K. (2017) Fossil calibrations for the cockroach  
3053 phylogeny (Insecta, Dictyoptera, Blattodea), comments on the use of wings for their  
3054 identification, and a redescription of the oldest Blaberidae. *Palaeontologia Electronica*,  
3055 **20.3.1FC**, 1–23.
- 3056 Gingerich, P.D. (1976) Cranial anatomy and evolution of early Tertiary Plesiadapidae  
3057 (Mammalia, Primates). *Papers on Paleontology*, **15**, 1–141.
- 3058 Gohrbandt, K. (1963) Zur Gliederung des Paläogens im Helvetikum nördlich von Salzburg nach  
3059 planktonischen Foraminiferen. *Mitteilungen der Geologischen Gesellschaft, Wien*, **56**, 1–116.
- 3060 Henderson, C.M., Davydov, V.I., Wardlaw, B.R., Gradstein, F.M., & Hammer, Ø. (2012). The  
3061 Permian Period. In *The Geologic Time Scale* (ed. by F.M. Gradstein, J.G. Ogg, M.D. Schmitz &  
3062 G.M. Ogg), Vol. 2, pp. 652–679. Elsevier.
- 3063 Kedves, M. (1967) Quelques types de sporomorphes du bassin lignitifère de Menat. *Acta*  
3064 *Biologica Szegediensis*, **13**, 11–23.
- 3065 Kedves, M. & Russell, D.E. (1982) Palynology of the Thanetian layers of Menat. The geology of  
3066 the Menat Basin, France. *Palaeontographica Abteilung B*, **182**, 87–150.
- 3067 Lucas, S.G. & Shen, S.-Z. (2018). The Permian timescale: an introduction. In *The Permian*  
3068 *Timescale* (ed. by S.G. Lucas & S.-Z. Shen), pp. 1–19. Geological Society, Special Publications,  
3069 London.
- 3070 Mayr, G., Hervet, S., & Buffetaut, E. (in press) On the diverse and widely ignored Paleocene  
3071 avifauna of Menat (Puy-de-Dôme, France): new taxonomic records and unusual soft tissue  
3072 preservation. *Geological Magazine*.
- 3073 Vandenberghe, N., Hilgen, F.J., Speijer, R.P., Ogg, J.G., Gradstein, F.M., Hammer, O., Hollis,  
3074 C.J., & Hooker, J.J. (2012). The Paleogene Period. In *The Geologic Time Scale* (ed. by F.M.  
3075 Gradstein, J.G. Ogg, M.D. Schmitz & G.M. Ogg), Vol. 2, pp. 855–921. Elsevier.

- 3076 Vincent, P.M., Aubert, M., Boivin, P., Cantagrel, J.-M., & Lenat, J.-F. (1977) Découverte d'un  
3077 volcanisme paléocène en Auvergne : les maars de Menat et leurs annexes ; étude géologique et  
3078 géophysique. *Bulletin de la Société Géologique de France*, (7), **19**, 1057–1070.
- 3079 Wappler, T., Currano, E.D., Wilf, P., Rust, J., & Labandeira, C.C. (2009) No post-Cretaceous  
3080 ecosystem depression in European forests? Rich insect-feeding damage on diverse middle  
3081 Palaeocene plants, Menat, France. *Proceedings of the Royal Society B, Biological Sciences*, **176**,  
3082 4271–4277.
- 3083 Wedmann, S., Wappler, T., & Engel, M.S. (2009) Direct and indirect fossil records of  
3084 megachilid bees from the Paleogene of Central Europe (Hymenoptera: Megachilidae).  
3085 *Naturwissenschaften*, **96**, 703–712.
- 3086 Wolfe, J.A., Daley, A.C., Legg, D.A., & Edgecombe, G.D. (2016) Fossil calibrations for the  
3087 arthropod Tree of Life. *Earth-Science Reviews*, **160**, 43–110.
- 3088

## 3089 **S3 Evolution of morphology, behavior and life history**

### 3090 **S3.1 Current knowledge about phenotypic evolution in Blattodea**

3091 The study of phenotypes is a key issue in understanding evolutionary relationships among  
3092 Blattodea. In precladistic times there were systematic studies of cockroach wings (Rehn, 1951),  
3093 tergal glands (Roth, 1969), proventriculus and genitalia (McKittrick, 1964). More formal  
3094 analyses were put forth in cladistics times, utilizing mostly genital morphology (Deitz et al.,  
3095 2003; Grandcolas, 1996; Klass & Meier, 2006; Klass, 2001). In the era of phylogenetic  
3096 systematics similar character systems have been used in conjunction with molecular data  
3097 (Djernæs et al., 2012; Djernæs et al., 2015; Ware et al., 2008).

3098 Although one can discuss the evolution of phenotypic characters in the context of the  
3099 above cited studies, it is perhaps more useful to discuss phenotypic evolution with a phylogenetic  
3100 topology derived from independent data (to avoid circular reasoning). Yet, few studies have used  
3101 phylogenetic topologies inferred from non-morphological data to investigate the evolution of  
3102 phenotypic features. Maekawa et al. (2003) inferred evolutionary patterns of soil and wood  
3103 burrowing among Panesthiinae cockroaches using their molecular phylogeny. Legendre et al.  
3104 (2014) discerned evolution of social behaviors among species of Blaberidae. Bourguignon, et al.  
3105 (2018) inferred patterns of biogeographical evolution among all cockroaches and termites.  
3106 Finally, most Dictyopteran systematic studies have, usually without formal analyses, inferred the  
3107 evolution of eusociality, sub-sociality, and parental care through phylogenetic hypotheses  
3108 inferred from independent data.

3109

### 3110 **S3.2 Ancestral state reconstruction of phenotypic traits**

3111 Morphological data was collected from previous publications (Djernæs et al., 2012;  
3112 Djernæs et al., 2015; Klass & Meier, 2006; McKittrick, 1964). Table S11 provides a list of the  
3113 included characters including their literature sources. Body size data was either taken from  
3114 taxonomic publications, or measured directly using specimens in the collection of Museum  
3115 national d'Histoire naturelle (Paris) or specimens identified by Dominic Evangelista. Body  
3116 length was measured as the length along the mid-line from the anterior most point to the end of  
3117 the abdomen (wings not considered). Body width was measured as the greatest body width  
3118 (wings not considered). Information on sociality and parental care was taken from published  
3119 literature (Bell et al., 2007; Gilbert & Manica, 2015; Wong et al., 2013). Additional characters  
3120 were considered (e.g. presence of *Blattabacterium*) but were excluded because of inappropriate  
3121 sampling or incomplete information.

3122 Species were assigned categorical character states for our 19 selected morphological,  
3123 behavioral and parental care characters (Table S11 and Supplementary File  
3124 “Blattodea\_ancStates\_datamatrix.nex” provided on Dryad). We inferred the most parsimonious  
3125 ancestral states of all characters along our best ML tree topology with the software Mesquite v.  
3126 3.3 (trace all characters / Parsimony Ancestral State) (Maddison & Maddison, 2017). Note that  
3127 Mesquite does not allow ancestral state reconstruction under the Dollo parsimony (Maddison &

3128 Maddison, 2008) optimality criterion, which penalizes the loss and subsequent regain of a  
 3129 character. Thus, certain reconstructions appear to show the loss of a character state in one lineage  
 3130 and its subsequent re-evolution in a descendant lineage.

3131 In addition to the parsimony ancestral state reconstruction of all characters, we also used  
 3132 a Bayesian ancestral state reconstruction with stochastic character mapping for all characters  
 3133 related to wing morphology (characters 15-18, see below). There are many lineages, particularly  
 3134 in Blattoidea, that are missing wings in the extant species, but whose ancestors may or may not  
 3135 have been missing wings. Stochastic character mapping allows us to infer the state of ancestors  
 3136 when the state of extant taxa is unknown. We specified this by providing a prior probability of  
 3137 0.5 for both states when wings were absent (in characters 16-18). The exact prior probabilities  
 3138 (“morpho\_data\_selected\_PriorProb\_version.csv”), input tree (“95datedTree.run1.tre”), and R  
 3139 script (“PhytoolsCode.R”) utilized can be found in the Supplementary File folder “Stochastic  
 3140 character analysis” found on DRYAD. Specifically, we used the software package Phytools  
 3141 (Revell, 2012) to stochastically map characters onto the phylogeny using specified prior  
 3142 probabilities and an equal rates matrix with the function `make.simmap` (Bollback, 2006). We did  
 3143 this for 100 trials and visualized the summary of all results mapped onto the tree.

3144

### 3145 **S3.3 Detailed description of selected characters**

3146 **Character 1: Body size (anterior margin of head - posterior margin of last segment,**  
 3147 **without cerci or other appendages) in mm: (0) smaller than 6.5; (1) 6.5-15; (2) 15-30; (3)**  
 3148 **above 30.** Information about body size of specimens was measured preferably on adult females  
 3149 of the collection of the Muséum national d'Histoire naturelle (Paris, France). In some cases, we  
 3150 relied on published species descriptions. Body size can be an indicator of other biological traits  
 3151 such as: reproductive strategy (Werner, 2011), population size (Blackburn, 1993), or locomotion  
 3152 and dispersal (Gutierrez, 1997; Ness, 2004).

3153 **Character 2: Ratio between body length and maximum width: (0) smaller than 2; (1) 2-2.5;**  
 3154 **(2) 2.6-3.5; (3) 3.5-5; (4) above 5.** Information about this ratio was measured preferably on  
 3155 females of the collection of the Muséum national d'Histoire naturelle (Paris, France). In some  
 3156 cases, we relied on species descriptions or images.

3157 **Character 3: Postovipositional maternal care: (0) absent; (1) present.** This form of care is  
 3158 found in Blaberids, *Blattella*, *Supella* and *Cryptocercus* (Bell et al., 2007; Gilbert & Manica,  
 3159 2015; Wong et al., 2013). Termites also show this behaviour during the early stages of colony  
 3160 foundation (Nalepa, 1984; Nalepa et al., 2001; Park et al., 2002; Seelinger & Seelinger, 1983;  
 3161 Watson et al., 1985).

3162 **Character 4: Long-lasting biparental care: (0) absent; (1) present.** Although biparental care  
 3163 is known in various roaches, long-term biparental care sensu Klass et al. (2008) is only found in  
 3164 *Cryptocercus* and the termites (Klass et al., 2008).

3165 **Character 5: Eusociality: (0) absent, (1) present.** Among Blattodea, only termites exhibit  
 3166 eusociality (Bell et al., 2007).

3167 **Character 6: Mode of reproduction: (0) Oviparity; (1) ovoviviparous or false viviparous;**  
 3168 **(2) viviparity.** We define oviparity as development of young in an ootheca that is not incubated  
 3169 within the mother until birth. We define ovoviviparity as development of young inside an  
 3170 ootheca that is incubated within the mother until birth. We define viviparity as development of  
 3171 young inside the mother, without the presence of an ootheca, until birth. Ovoviviparity, a.k.a.  
 3172 false viviparity, are found in Blaberidae with the remaining Dictyoptera being oviparous.  
 3173 Viviparity is found only in *Diploptera punctata* (Djernæs et al., 2012; Klass & Meier, 2006;  
 3174 McKittrick, 1964).

3175 **Character 7: Ootheca: (0) absent; (1) present.** An ootheca is present in all Dictyoptera with  
 3176 the exception of Euisoptera (i.e. termites excluding *Mastotermes*) (Nalepa & Lenz, 2000) and  
 3177 viviparous taxa (Bell et al., 2007).

3178 **Character 8: Ootheca: (0) deposited; (1) carried around.** Most oviparous cockroaches deposit  
 3179 their ootheca (either by attaching it to substrate or just dropping it) but some Blattellinae carry it  
 3180 around for a significant amount of time. All ovoviviparous cockroach species carry their  
 3181 ootheca, by definition (Djernæs et al., 2012; Klass & Meier, 2006; McKittrick, 1964).

3182 **Character 9: Ootheca deposition: (0) laid directly into dug hole; (1) laid first, hole**  
 3183 **prepared, then ootheca moved into hole; (2) laid and ignored.** Corydioidea are known to drop  
 3184 their ootheca without putting it into a hole whereas the oviparous Blaberoidea and Blattoidea  
 3185 usually dig a hole and then drop the ootheca into it. In *Lamproblatta* and *Cryptocercus*, mothers  
 3186 lay the ootheca first, then dig the hole, and finally place the ootheca into the hole (Cleveland,  
 3187 1934; McKittrick, 1964).

3188 **Character 10: Advanced rotation of ootheca in vestibulum: (0) absent; (1) present.** The  
 3189 rotation refers to a turn of the ootheca such that its keel is lateral rather than dorsal. This  
 3190 character is coded according to Klass & Meier (2006).

3191 **Character 11: Position of the ootheca during formation: (0) outside the body; (1) inside the**  
 3192 **body.** Mantodea form their ootheca externally, on substrate. In contrast, Blattodea form it  
 3193 internally, although it is sometimes glued to substrate after its internal formation.

3194 **Character 12: Orientation of phallomere asymmetry: (0) normal: left complex on left side,**  
 3195 **right phallomere on right side; (1) reversed: left complex on right side, right phallomere on**  
 3196 **left side.** Character 107 of Klass & Meier (2006). Following Klass (1997): the left phallomere  
 3197 complex is defined as the complex bearing the hooked sclerite (hla) ancestrally in Mantodea and  
 3198 Blattodea. In living taxa, this state is seen in most Mantodea, and most lineages of Blattodea (all  
 3199 Solumblattodea and many Blaberoidea). Additional information on this character is provided in  
 3200 Klass (1997).

3201 **Character 13: Symmetry of external genitalia: (0) strongly asymmetrical; (1) (almost)**  
 3202 **bilaterally symmetrical (including virtual absence).** External genitalia refers to the genital  
 3203 phallomeres (not paraprocts or subgenital plate, or supraanal plate). This character is coded  
 3204 according to Klass & Meier (2006).

3205 **Character 14: Nest (built galleries): (0) absent; (1) present.** Subsocial and social taxa in  
 3206 Blattodea build nests by boring through wood or soil. This is ubiquitous among termites and

3207 *Cryptocercus* (Deitz et al., 2003). It is also present in some Blaberidae (Legendre et al., 2014;  
3208 Maekawa et al., 2003), but we do not include these taxa here.

3209 **Character 15: Wings: (0) absent; (1) present.** The coding is based on specimens of the  
3210 collection of the Muséum national d'Histoire naturelle (Paris, France). In some cases, we relied  
3211 on species descriptions.

3212 **Character 16: Wings: (0) cannot be dropped; (1) can be dropped.** Termites drop their wings  
3213 along a predefined breaking line (Myles, 1988).

3214 **Character 17: Plicatum of hindwing folding: (0) folding simple; (1) folded fan-like.**  
3215 Corydioidea have a simple, non-fanwise fold in their wing. All non-termite cockroaches with  
3216 large wings have a plicatum that folds along the radiant-shaped anal veins, like an accordion  
3217 (Rehn, 1951). Euisoptera lack a folded plicatum entirely.

3218 **Character 18: Tegminization of forewings: (0) absent; (1) present.** All studied Blattodea,  
3219 with the exception of termites and *Nocticola*, have sclerotized front wings. They are considered  
3220 to be a protection against damage in small and narrow spaces. Termites dealate before entering a  
3221 life in the ground and *Nocticola* lives in caves.

3222 **Character 19: Number of ocelli: (0) zero; (1) two; (2) three.** All studied extant Blattodea have  
3223 two ocelli, although in some they are severely reduced. The only exception is *Cryptocercus* that  
3224 lacks them completely. Extant Mantodea have three ocelli (Brannoch et al., 2017).

3225

### 3226 **S3.4 Results and discussion**

3227 Table S12 provides the results of the parsimony mapping for the major clades. Full  
3228 results of parsimony ancestral state reconstructions can be found in Supplementary File  
3229 “Blattodea\_ancStates\_datamatrix.nex” deposited on Dryad. Here we will focus on overall trends  
3230 in the results as well as interpretations not discussed in the main text.

3231 Overall, our results of the parsimony ancestral state reconstructions are mostly consistent  
3232 with expected patterns or they remain ambiguous because of missing data. Ovovivipary and  
3233 vivipary are limited to Blaberidae and did not arise elsewhere. Similarly, extended care of  
3234 ootheca is also shared among all Blaberidae, even though it seems to have evolved independently  
3235 at least once, but missing character information may be affecting this inference. Nearly all  
3236 Corydioidea are thought to lay ootheca and subsequently ignore it. Our reconstruction for the  
3237 ancestor of Corydioidea and Corydiidae s.s., however, is ambiguous because of missing data in  
3238 *Nocticola* and *Tivia*.

3239 Results for the parsimony ancestral state reconstructions of characters 16-18 were  
3240 ambiguous for many nodes in Blattoidea because a few major line-ages (Lamproblattidae,  
3241 Cryptocercidae, Tryonicidae) lack wings. The Bayesian analysis, utilizing stochastic character  
3242 mapping, brings some insight into the evolution of these characters. This analysis finds that the  
3243 ancestor of Kittrickia, Tutricablattae and Blattoidea most likely had wings (either brachypterous  
3244 or macropterous) whereas this was ambiguous in the parsimony reconstruction. Given that, it is  
3245 meaningful to discuss the inferred state of characters 16-18 for these nodes. The results of all the  
3246 Bayesian analyses can be seen in the tree visualizations on the data uploaded to DRYAD.



3247 The parsimony and Bayesian analyses agree that the ancestor of Blattoidea did not drop  
 3248 its wings (as seen in termites; although see Evangelista, 2017 for a behavioral observation  
 3249 regarding Eurycotis that might affect these re-sults). The parsimony reconstruction was  
 3250 ambiguous for the ancestors of Kittrickeya and Tutricablattae. The Bayesian reconstruction gives  
 3251 the ancestor of Kittrickeya has ~0.25 posterior probability (pp) for wing dropping and the ancestor  
 3252 of Tutricablattae has a >0.50 pp of dropping its wings. This finding is noteworthy because it  
 3253 indicates it is plausible for wing-dropping to be plesiomorphic to Isoptera.

3254 We coded hindwing folding (character 17) as a categorical state in the parsimony analysis  
 3255 but as a binary state (presence or absence of fan-wise folding) in the Bayesian analysis with prior  
 3256 probability of 0.5 for wing-less taxa. The results of the Bayesian analysis show that the hindwing  
 3257 of the ancestors for Solumblattodea, Blattoidea, Kittrickeya and Tutricablattae were likely not  
 3258 folded fan-wise and the ancestor of Blattoidae is ambiguous.

3259 The parsimony reconstruction inferred character 18 as an ambiguous state for Kittrickeya  
 3260 and Tutricablattae. However, the Bayesian analysis shows that it is likely the ancestor of  
 3261 Kittrickeya had tegminized forewings (>0.75 pp) but tegminization was unclear for the ancestor of  
 3262 Tutricablattae with marginally more support (>0.50 pp) for a membranous forewing in this  
 3263 species.

3264 There were some cases where missing data for extant taxa was limiting our inference for  
 3265 ancestral nodes. Having a more complete character matrix would improve our reconstructions in  
 3266 this regard. Increased taxon sampling would also improve our inference of some traits. This is  
 3267 particularly true for our inference of body size evolution, which we find changes very often  
 3268 among the subgroups of Blattodea.

3269

3270

3271

3272

## 3273 **References**

3274 Bell, W.J., Roth, L.M., & Nalepa, C. (2007) *Cockroaches: Ecology, Behavior and Natural*  
 3275 *History* Johns Hopkins University Press, Baltimore.

3276 Blackburn, T.M., Brown, V.K., Doube, B.M., Greenwood, J.J.D., Lawton, J., & Stork, N.E.  
 3277 (1993) The Relationship between Abundance and Body Size in Natural Animal Assemblages.  
 3278 *Journal of Animal Ecology*, **62**, 519-528.

3279 Brannoch, S.K., Wieland, F., Rivera, J., Klass, K.-D., Béthoux, O., & Svenson, G.J. (2017)  
 3280 Manual of praying mantis morphology, nomenclature, and practices (Insecta, Mantodea).  
 3281 *ZooKeys*, **696**, 1-100.

3282 Bollback, J.P. (2006) Stochastic character mapping of discrete traits on phylogenies. *BMC*  
 3283 *Bioinformatics*, **7**, 88.

3284 Cleveland, L.R. (1934) The wood-feeding roach *Cryptocercus*, its protozoa, and the symbiosis  
 3285 between protozoa and roach. *Mem. Amer. Acad. Art. Sci.*, **17**, 185-342.

- 3286 Deitz, L., Nalepa, C.A., & Klass, K.D. (2003) Phylogeny of the Dictyoptera re-examined  
3287 (Insecta). *Entomologische Abhandlungen*, **61**.
- 3288 Djernæs, M., Klass, K.-D., Picker, M.D., & Damgaard, J. (2012) Phylogeny of cockroaches  
3289 (Insecta, Dictyoptera, Blattodea), with placement of aberrant taxa and exploration of out-group  
3290 sampling. *Systematic Entomology*, **37**, 65-83.
- 3291 Djernæs, M., Klass, K.D., & Eggleton, P. (2015) Identifying possible sister groups of  
3292 Cryptocercidae+Isoptera: A combined molecular and morphological phylogeny of Dictyoptera.  
3293 *Molecular Phylogenetics and Evolution*, **84**, 284-303.
- 3294 Evangelista, D. (2017). Species account: *Eurycotis blattoides*. In *Suriname: Natural History &*  
3295 *Ecology* (ed. by H. Hiwat & B.D. Dijn), **1**, WWF Guianas, pp. 190.
- 3296 Gilbert, J.D. & Manica, A. (2015) The evolution of parental care in insects: A test of current  
3297 hypotheses. *Evolution*, **69**, 1255-70.
- 3298 Gutierrez, D. & Menendez, R. (1997) Patterns in the distribution, abundance and body size of  
3299 carabid beetles (Coleoptera: Caraboidea) in relation to dispersal ability. *Journal of*  
3300 *Biogeography*, **24**, 903-914.
- 3301 Grandcolas, P. (1996) The phylogeny of cockroach families: A cladistic appraisal of morpho-  
3302 anatomical data. *Canadian Journal of Zoology*, **74**, 508-527.
- 3303 Klass, K.-D. (1997) The external male genitalia and the phylogeny of Blattaria and Mantodea.  
3304 *Bonner Zoologische Monographien*, **42**, 1-340.
- 3305 Klass, K.-D. & Meier, R. (2006) A phylogenetic analysis of Dictyoptera (Insecta) based on  
3306 morphological characters. *Entomologische Abhandlungen*, **63**, 3-50.
- 3307 Klass, K.D. (2001) Morphological evidence on Blattarian phylogeny: "Phylogenetic histories and  
3308 stories" (Insecta, Dictyoptera). *Berliner Entomologische Zeitschrift*, **48**, 223-265.
- 3309 Klass, K.D., Nalepa, C., & Lo, N. (2008) Wood-feeding cockroaches as models for termite  
3310 evolution (Insecta: Dictyoptera): *Cryptocercus* vs. *Parasphaeria boleiriana*. *Molecular*  
3311 *Phylogenetics and Evolution*, **46**, 809-17.
- 3312 Legendre, F., D'Haese, C.A., Deleporte, P., Pellens, R., Whiting, M.F., Schliep, K., &  
3313 Grandcolas, P. (2014) The evolution of social behaviour in Blaberid cockroaches with diverse  
3314 habitats and social systems: Phylogenetic analysis of behavioural sequences. *Biological Journal*  
3315 *of the Linnean Society*, **111**, 58–77.
- 3316 Maddison, W.P. & Maddison, D.R. (2008) *Mesquite: A modular system for evolutionary*  
3317 *analysis*.
- 3318 Maddison, W.P. & Maddison, D.R. (2017) *Mesquite: A modular system for evolutionary*  
3319 *analysis*, Version 3.31.

- 3320 Maekawa, K., Lo, N., Rose, H.A., & Matsumoto, T. (2003) The evolution of soil-burrowing  
3321 cockroaches (Blattaria: Blaberidae) from wood-burrowing ancestors following an invasion of the  
3322 latter from Asia into Australia. *Proceedings of the Royal Society of London. Series B: Biological*  
3323 *Sciences*, **270**, 1301-7.
- 3324 McKittrick, F.A. (1964) Evolutionary studies of cockroaches. *Cornell Experiment Station*  
3325 *Memoir*, **389**, 1-134.
- 3326 Myles, T.G. (1988) Termite social evolution. PhD, The University Of Arizona.
- 3327 Nalepa, C.A. (1984) Colony composition, protozoan transfer and some life history characteristics  
3328 of the woodroach *Cryptocercus punctulatus* Scudder (Dictyoptera: Cryptocercidae). *Behav Ecol*  
3329 *Sociobiol*, **14**, 273-279.
- 3330 Nalepa, C.A. & Lenz, M. (2000) The ootheca of *Mastotermes darwiniensis* Froggatt (Isoptera:  
3331 Mastotermitidae): homology with cockroach oothecae. *Proc. R. Soc. Lond. B*, **267**, 1809-1813.
- 3332 Nalepa, C.A., Miller, L.R., & Lenz, M. (2001) Flight characteristics of *Mastotermes*  
3333 *darwiniensis* (Isoptera, Mastotermitidae). *Insectes Sociaux*, **48**, 144-148.
- 3334 Ness, J.H., Bronstein, J.L., Andersen, A.N., & Holland, J.N. (2004) Ant body size predicts  
3335 dispersal distance of ant-adapted seeds: Implications of small-ant invasions. *Ecology*, **85**, 1244-  
3336 1250.
- 3337 Park, Y.C., Grandcolas, P., & Choe, J.C. (2002) Colony composition, social behavior and some  
3338 ecological characteristics of the korean wood-feeding cockroach (*Cryptocercus kyebangensis*).  
3339 *Zoological Science*, **19**, 1133-1139.
- 3340 Rehn, J.W.H. (1951) Classification of the Blattaria as indicated by their wings (Orthoptera).  
3341 *Memoirs of the American Entomological Society*, **14**, 1-134.
- 3342 Revell, L.J. (2012) phytools: An R package for phylogenetic comparative biology (and other  
3343 things). *Methods in Ecology and Evolution*, **3**, 217-223.
- 3344 Roth, L. (1969) The evolution of male tergal glands in the Blattaria. *Annals of the Entomological*  
3345 *Society of America*, **62**, 178-208.
- 3346 Seelinger, G. & Seelinger, U. (1983) On the Social Organisation, Alarm and Fighting in the  
3347 Primitive Cockroach *Cryptocercus punctulatus* Scudder. *Ethology*, **61**, 315-333.
- 3348 Ware, J.L., Litman, J., Klass, K.-D., & Spearman, L.A. (2008) Relationships among the major  
3349 lineages of Dictyoptera: The effect of outgroup selection on Dictyopteran tree topology.  
3350 *Systematic Entomology*, **33**, 429-450.
- 3351 Watson, J.A.L., Okot-Kotber, B.M., & Noirot, C. (1985) Caste Differentiation in Social Insects.  
3352 *Current Themes in Tropical Science*. Pergamon, Oxford, UK.

3353 Werner, J. & Griebeler, E.M. (2011) Reproductive biology and its impact on body size:  
3354 comparative analysis of mammalian, avian and dinosaurian reproduction. *PLoS One*, **6**, e28442.

3355 Wong, J.W.Y., Meunier, J., & Kölliker, M. (2013) The evolution of parental care in insects: the  
3356 roles of ecology, life history and the social environment. *Ecological Entomology*, **38**, 123-137.

3357

3358

3359

## S4 Taxonomic terminology

### 3360 S4.1 Criteria for naming clades

3361 In Table S13 and below, we clarify the meaning of taxonomic names used in the main  
 3362 text and formally propose new ones for previously unnamed clades. The names utilized here  
 3363 follow Beccaloni and Eggleton (2013), which is the naming scheme utilized for the cockroach  
 3364 species file online database (Beccaloni, 2018). We treated names for clades based on the  
 3365 following criteria: implied monophyly (e.g. Nocticolinae, instead of Nocticolidae, which makes  
 3366 Corydiidae paraphyletic), clarity (e.g. while Corydiidae, Corydiidae *s.s.* or Corydiidae *s.l.* can be  
 3367 ambiguous, Corydioidea should easily be understood to contain the Corydiidae and  
 3368 Nocticolidae), ease of use (e.g. Blattoidea instead of “Blattidae + Tryonicidae + Lamproblattidae  
 3369 + Cryptocercidae + Termitoidea”), or historical usage (e.g. we treat Isoptera as an unranked  
 3370 name for termites, since it is still in such wide usage despite being an invalid ordinal rank). Also,  
 3371 we voted to use the name of genera in our dataset for clades we sampled poorly (e.g. we refer to  
 3372 *Lamproblatta* instead of Lamproblattidae, even though this one genus could be a representative  
 3373 of the whole family, which contains only 10 species). Finally, we propose new names for  
 3374 important clades recovered with strong support. In some cases, we attempt to make these names  
 3375 consistent with traditional Linnaean taxonomic procedure despite the fact that any rank above  
 3376 species does not represent any natural classification but rather an artificial, man-made system.  
 3377 We provide detailed justification and character support for each newly defined clade. See Table  
 3378 S13 for a list of all preferred names and their synonymy.

3379

### 3380 S4.2 Systematic entomology for the newly proposed terms

3381 **Solumblattodea** Evangelista and Wipfler *nom. nov.*

3382 **Systematic scope.** The taxon includes Corydioidea Saussure, 1864 and Blattoidea  
 3383 Latreille, 1810.

3384 **Diagnosis.** Adult female subgenital plate valvate (divided), as opposed to simple and  
 3385 undivided. Male genital sclerites not separated and left phallomere (side with hook) complex, as  
 3386 opposed to separated by soft membranes and simplified left (side with hook) phallomeres.

3387 **Remarks.** We found strong statistical support for this clade (bootstrap analysis and Four-  
 3388 cluster Likelihood Mapping; Figure S4). Also, the character “female subgenital plate valvate” is  
 3389 highly conserved and does not appear in any other extant taxa (i.e., in the sister group,  
 3390 Blaberoidea). However, the character is likely plesiomorphic as it is present in Mantodea  
 3391 (Hörnig et al., 2018).

3392 **Etymology.** Derived from latin meaning “ground cockroaches”. This refers to the affinity  
 3393 of many species for sand (Corydiinae), caves (Nocticolinae), or soil (many termites).  
 3394 Additionally, many major lineages are flightless (Cryptocercidae, Lamproblattidae, Tryonicidae,  
 3395 Duchailiinae, *Eurycotis*) or poor fliers (e.g., Corydiinae, Blattinae) limiting these taxa to the  
 3396 ground-dwelling or arboreal lifestyles.

3397

3398 **Kittrickea** Wipfler and Evangelista *nom. nov.*

3399 **Systematic scope.** This taxon includes Lamproblattidae McKittrick, 1964,  
3400 Cryptocercidae Handlirsch, 1925, and Isoptera Brullé, 1832 (or synonymously called  
3401 Termitoidae, Latreille, 1802).

3402 **Diagnosis.** A-B-C ootheca laying sequence (A = lay ootheca; B = dig protective hole; C  
3403 = deposit ootheca in hole), as opposed to B-A-C. Absence of muscle 14, as opposed to presence  
3404 of muscle 14.

3405 **Remarks.** McKittrick (1965) discussed the relationship between *Cryptocercus* and  
3406 Isoptera, and stated “*L. albipalpus* is phylogenetically the closest known cockroach to  
3407 *Cryptocercus*” citing her then recent work McKittrick (1964) as supporting evidence. McKittrick  
3408 (1964) did not actually show this in a formal phylogenetic analysis but did in fact discuss  
3409 morphological and behavioral similarity among the two clades. Particularly, she discusses  
3410 similarities in the proventriculus, female genitalia, and ootheca protection sequence.

3411 The formalized morphological analysis of Klass and Meier (2006) did not recover this  
3412 clade but did give one male genital character (absence of muscle 14) common to *Lamproblatta*,  
3413 *Anaplecta* and *Cryptocercus*. We do not include *Anaplecta*, or any Anaplectidae in this clade as  
3414 of yet, but further systematic studies could prove its presence in this clade. Prior studies have  
3415 suggested this as a possibility (Djernæs et al., 2015; Evangelista et al., 2018).

3416 **Etymology.** This taxon is named after Frances Ann McKittrick, who was the first to give  
3417 evidence for this phylogenetic hypothesis.

3418  
3419 **Tutricablattae** Wipfler and Evangelista *nom. nov.*

3420 **Systematic scope.** The taxon includes Cryptocercidae Handlirsch, 1925, and Isoptera  
3421 Brullé, 1832 (or Termitoidae Latreille, 1802).

3422 **Diagnosis.** Living in colonies with social structure. Having biparental care at least in  
3423 some colonial stages. Wood feeding. Forming galleries or nests in wood. Hindgut fauna of  
3424 oxymonadid and hypermastigid flagellates. Performs anal trophallaxis. Antenna moniliform as  
3425 opposed to filiform. In male genitalia muscle 15 absent. In proventriculus primary pulvilli greatly  
3426 expanded (partially overlapping neighboring sclerites).

3427 **Remarks.** Behavioral, life history, and physiological support for this relationship is given  
3428 in Klass et al. (2008) and morphological support for the relationship is given in Klass & Meier  
3429 (2006). Molecular phylogenetic studies support this relationship unequivocally (Djernæs et al.,  
3430 2012; Djernæs et al., 2015; Inward et al., 2007; Legendre et al., 2015; Ware et al., 2008).

3431 **Etymology.** The name Tutricablattae derives from the latin “tutrices” meaning female  
3432 guardians and “blatta” meaning cockroaches.

3433  
3434 **References**

3435 Beccaloni, G. (2018) Cockroach Species File Online. Version 5.0/5.0. World Wide Web  
3436 electronic publication, World Wide Web electronic publication.

3437 Beccaloni, G. & Eggleton, P. (2013) Order: Blattodea. *Zootaxa*, **3703**, 46.



- 3438 Djernæs, M., Klass, K.-D., Picker, M.D., & Damgaard, J. (2012) Phylogeny of cockroaches  
3439 (Insecta, Dictyoptera, Blattodea), with placement of aberrant taxa and exploration of out-group  
3440 sampling. *Systematic Entomology*, **37**, 65-83.
- 3441 Djernæs, M., Klass, K.D., & Eggleton, P. (2015) Identifying possible sister groups of  
3442 Cryptocercidae+Isoptera: A combined molecular and morphological phylogeny of Dictyoptera.  
3443 *Molecular Phylogenetics and Evolution*, **84**, 284-303.
- 3444 Evangelista, D., Thouzé, F., Kohli, M.K., Lopez, P., & Legendre, F. (2018) Topological support  
3445 and data quality can only be assessed through multiple tests in reviewing Blattodea phylogeny.  
3446 *Molecular Phylogenetics and Evolution*.
- 3447 Grandcolas, P. (1996) The phylogeny of cockroach families: A cladistic appraisal of morpho-  
3448 anatomical data. *Canadian Journal of Zoology*, **74**, 508-527.
- 3449 Hörnig, M.K., Haug, C., Schneider, J.W., & Haug, J.T. (2018) Evolution of reproductive  
3450 strategies in Dictyopteran insects — clues from ovipositor morphology of extinct roachoids. *Acta*  
3451 *Palaeontologica Polonica*, **63**, 1-24.
- 3452 Inward, D., Beccaloni, G., & Eggleton, P. (2007) Death of an order: A comprehensive molecular  
3453 phylogenetic study confirms that termites are eusocial cockroaches. *Biology Letters*, **3**, 331-5.
- 3454 Klass, K.-D. & Meier, R. (2006) A phylogenetic analysis of Dictyoptera (Insecta) based on  
3455 morphological characters. *Entomologische Abhandlungen*, **63**, 3-50.
- 3456 Klass, K.D., Nalepa, C., & Lo, N. (2008) Wood-feeding cockroaches as models for termite  
3457 evolution (Insecta: Dictyoptera): *Cryptocercus* vs. *Parasphaeria boleiriana*. *Molecular*  
3458 *Phylogenetics and Evolution*, **46**, 809-17.
- 3459 Legendre, F., Nel, A., Svenson, G.J., Robillard, T., Pellens, R., & Grandcolas, P. (2015)  
3460 Phylogeny of Dictyoptera: Dating the origin of cockroaches, praying mantises and termites with  
3461 molecular data and controlled fossil evidence. *PLoS One*, **10**, e0130127.
- 3462 McKittrick, F.A. (1964) Evolutionary studies of cockroaches. *Cornell Experiment Station*  
3463 *Memoir*, **389**, 1-134.
- 3464 McKittrick, F.A. (1965) A contribution to the understanding of cockroach-termite affinities.  
3465 *Annals of the Entomological Society of America*, **58**, 18-22.
- 3466 Princis, K. (1966) Blattariae: Suborbo Blattoidea: Fam. Blattidea, Nocticolidae W. Junk, 's-  
3467 Gravenhage.
- 3468 Roth, L.M. (1988) Some cavernicolous and epigeal cockroaches with six new species, and a  
3469 discussion of the Nocticolidae (Dictyoptera: Blattaria). *Revue Suisse de Zoologie*, **95**, 297-321.
- 3470 Roth, L.M. (2003) Systematics And Phylogeny Of Cockroaches (Dictyoptera: Blattaria).  
3471 *Oriental Insects*, **37**, 1-186.

- 3472 Wang, Z., Shi, Y., Qiu, Z., Che, Y., & Lo, N. (2017) Reconstructing the phylogeny of Blattodea:  
3473 Robust support for interfamilial relationships and major clades. *Scientific Reports*, **7**, 1-8.
- 3474 Ware, J.L., Litman, J., Klass, K.-D., & Spearman, L.A. (2008) Relationships among the major  
3475 lineages of Dictyoptera: The effect of outgroup selection on Dictyopteran tree topology.  
3476 *Systematic Entomology*, **33**, 429-450.
- 3477

3478 **Appendix: Supplementary files and descriptions provided via the**  
 3479 **Digital Repository DRYAD**

3480

3481 Files can be found here: <https://doi.org/10.5061/dryad.p5t5gh1>

3482

3483 **Supplementary Archive 1.**

3484 This archive contains all files relevant to molecular analyses (see Supplementary text S1:

3485 Datasets and molecular analyses). [Supplementary\_Archive\_1.zip: 54.17 MB,

3486 md5sum:e5cad31efa62d6015f2666ee781396c7]

3487

3488 The archive contains the following subdirectories:

3489 **S1.1\_OrthologSet**

3490 Files can be used as input for Orthograph. The subdirectory includes a table with all orthologous sequence groups

3491 (OGs) as used in this study from the OrthoDB8 database. We provide the table with annotation and without; latter

3492 serves as input Orthograph (\*\_orthograph.txt), and the four official gene sets on amino-acid (\*.protein.fas) and

3493 nucleotide level (\*.CDS.fas) cleaned and with corresponding headers (FASTA format) for the reciprocal BLAST

3494 search (= ready to use for HaMStR-ad and Orthograph). Shortcuts: EDAN: *E. danica*, LFUL: *L. fulva*, RPRO: *R.*

3495 *prolixus*, ZNEV: *Z. nevadensis*, see Supplementary Table S3 and Methods section.

3496

3497 **S1.2\_Datasets**

3498 This subdirectory includes two supermatrices (PHYLIP format) and respective partition files (NEXUS format)

3499 including selected models (\*partitions.nex, assigned models to each partition are listed at the bottom). The

3500 partitioning based on protein domains annotation.

- 3501 • decisive supermatrix (superalignment) on amino-acid level + corresponding partition file including selected
- 3502 models (“decisive amino-acid dataset”, see Figure 1)

- 3503 • supermatrix on nucleotide level including only 2<sup>nd</sup> codon positions + corresponding partition file including
- 3504 selected models (“full nucleotide dataset”, see Supplementary Figure S3)

3505

3506

3507 **S1.3\_AU\_Tests**

3508 This subdirectory includes supplementary files and results of all AU-test analyses in plain text format.

- 3509 • Blattodea\_AUtest\_command.txt: command as used in IQTree

- 3510 • Blattodea\_AUtest\_trees.tre: all trees tested in Newick format (best ML tree inferred plus 13 alternative topologies, see comments and Supplementary Table S7)

- 3511 • Blattodea\_AUtest.log; Blattodea\_Autest.iqtree: IQTree output files

- 3512 • Blattodea\_AUtest\_information\_on\_tested\_trees.txt: additional information corresponding to the log file and
- 3513 AUtest result

3514

3515 **S1.4\_Anallacta**

3516 This subdirectory includes the alignment (nucleotide level, FASTA format) of cytochrome oxidase I (COI)

3517 sequences of i) a cultured specimen of *Anallacta* sp. (SANGER sequences) and ii) extracted from the transcriptome

3518 used in this study, see also Supplementary text S1).

3519

3520 **S1.5\_Dating**

3521 This subdirectory includes files and subdirectories related to divergence time analyses (plain text files).

- 3522 • Blattodea\_calibrations.tre: tree with minimum and maximum prior age calibrations (NEWICK format as
- 3523 required for MCMCTree), see Figure S5 and Supplementary material S2.

- 3524
- 3525
- 3526
- 3527
- 3528
- 3529
- 3530
- 3531
- 3532
- 3533
- 3534
- 3535
- 3536
- 3537
- 3538
- 3539
- 3540
- 3541
- 3542
- 3543
- 3544
- 3545
- *Blattodea\_mcmcTree.cti*: MCMCTree control file (example filenames) for the main analyses after generation of the Hessian matrix. Note that for all runs parameters were kept identical.
  - *Blattodea\_supermatrix\_aa\_reduced\_95.fas*: reduced amino-acid dataset (FASTA format). See Supplementary texts S1. For resulting divergence dates see Figure 1.
  - *Blattodea\_priorOnly\_noData\_1run.tre*: tree inferred from the analysis utilizing priors only used to check if priors were conflicting and to map effective and specified priors in relation to each other. For further details see Supplementary text S1 and Figure S6.
  - *Blattodea\_FigTree\_full\_aa\_run3.tre*: Chronogram inferred from unreduced amino-acid dataset (replicate run 3, chosen arbitrarily among 4 replicates, for details see Supplementary text S1).
  - *Blattodea\_FigTree\_95\_aa\_run1.tre*: Chronogram inferred from the reduced amino-acid dataset (replicate run 3, chosen arbitrarily among 4 replicates, for details see Supplementary text S1).
  - *Blattodea\_FigTree\_95\_aa\_run1\_altCalibrations.tre*: Chronogram inferred from the reduced amino-acid dataset with alternative prior calibrations (for details see Supplementary text S1 and Table S9).
  - Subdirectory “dated\_trees\_unreduced”>: Chronograms (NEWICK format) inferred from the unreduced amino-acid dataset, 4 replicates; the chronogram from run 3 was arbitrarily chosen as the representative for dates reported in our stud (also see Supplementary text S1 and Table S9).  
Files: *FigTree\_full\_run1.tre*; *FigTree\_full\_run2.tre*; *FigTree\_full\_run3.tre*; *FigTree\_full\_run4.tre*
  - Subdirectory “dated\_trees\_reduced”>: Chronograms (NEWICK format) inferred from the reduced amino-acid dataset, 4 replicates; the chronogram from run 1 was arbitrarily chosen as the representative for dates reported in our study (also see Supplementary text S1 and Table S9).  
Files: *FigTree\_95\_run1.tre*; *FigTee\_95\_run2.tre*; *FigTree\_95\_run3.tre*; *FigTree\_95\_run4.tre*

### 3546 **S1.6 Blattabacterium**

3547 This subdirectory includes a spreadsheet with the number of transcripts identified as *Blattabacterium* for each taxon  
3548 (sheet 1) and the sequence name and organismal identity of each candidate transcript (sheet 2), details are provided  
3549 in Supplementary text S1.

3550

3551

### 3552 **Supplementary Archive 2.**

3553 This archive refers to analyses as described in Supplementary text S3: Evolution, Morphology &  
3554 Behavior. [Supplementary\_Archive\_2.zip: 93.97 KB,  
3555 md5sum:84590a5ef1d875f748a8c0e3cad4483d]

3556

### 3557 **Ancestral state reconstruction**

3558 The file includes the input character matrix (NEXUS format) and output (Figure 3) of the ancestral state  
3559 reconstructions for 19 morphological characters listed in the Supplementary text S3. Details on character states are  
3560 provided in S3.3, see Table S11 for a more readable summary of the input matrix and Table S12 for the ancestral  
3561 states of selected nodes only. This matrix was used as input for parsimony analysis with Mesquite.

3562 File: *Blattodea\_ancStates\_datamatrix.nex*

3563

### 3564 **Subdirectory “Stochastic character analysis”**

3565 This subdirectory includes supplementary files, subdirectories and results of the stochastic character mapping  
3566 Bayesian ancestral state inference with Phytools.

- 3567
- 3568
- 3569
- 3570
- *PhytoolsCode.R*: R-script used to analyze the input data.
  - *95datedTree.run1.tre*: divergence dated tree obtained with the reduced dataset.
  - *morpho\_data\_selected\_PriorProb\_version.csv* : Input data matrix with prior probabilities for the two states of each character analyzed.

3571

- 3572
- 3573
- 3574
- **Character 15** - subdirectory with results of the analyses for character 15 (wing presence and absence).
    - *Info.txt*: Output from the Phytools (make.simmap) analysis, summary output, description of the color code used in the corresponding figure, and notes about the results.

- 3575  
3576  
3577  
3578  
3579  
3580  
3581  
3582  
3583  
3584  
3585  
3586  
3587  
3588  
3589  
3590  
3591  
3592  
3593  
3594  
3595  
3596  
3597
- Wing presence and absence.png: result of the Bayesian ancestral state reconstruction of wing presence and absence in Blattodea. Red coloration indicates posterior probability of wing presence; black coloration indicates posterior probability of wing absence.
  - **Character 16** - subdirectory with results of the analyses for character 16 (wings dropped or retained).
    - Info.txt: Output from the Phytools (make.simmap) analysis, summary output, description of the color code used in the corresponding figure, and notes about the results.
    - Wing dropping.png: results of the Bayesian ancestral state reconstruction of wing dropping and retention in Blattodea. Red coloration indicates posterior probability of wing dropping; black coloration indicates posterior probability of wing retention.
  - **Character 17** - subdirectory with results of the analyses for character 17 (hindwing folding simple or fanlike).
    - Info.txt: Output from the Phytools (make.simmap) analysis, summary output from a summary of that analysis, a description of the color code used in the corresponding figure, and notes about the results.
    - Hindwing folding.png: A Bayesian ancestral state reconstruction of hindwing folding in Blattodea. Red coloration indicates posterior probability of a non-fan-like fold; black coloration indicates posterior probability of fan-like fold.
  - **Character 18** - subdirectory with results of the analyses for character 18 (forewing tegminization).
    - Info.txt: Output from the Phytools (make.simmap) analysis, summary output, a description of the color code used in the corresponding figure, and a notes about the results.
    - Tegminization.png: A Bayesian ancestral state reconstruction of hindwing folding in Blattodea. Red coloration indicates posterior probability of a tegminized forewings; black coloration indicates posterior probability of membranous forewings.
